# Supplementary material for: The sterlet sturgeon genome sequence and the mechanisms of segmental rediploidization
Source: Springer Nature journal article supplement (doi:10.1038/s41559-020-1166-x), 2020-03-30

In the format provided by the authors and unedited.

# The sterlet sturgeon genome sequence and the mechanisms of segmental rediploidization

Kang Du<sup>1,2</sup>, Matthias Stöck<sup>3</sup>  , Susanne Kneitz<sup>1</sup>, Christophe Klopp<sup>4,5</sup> , Joost M. Woltering<sup>6</sup>, Mateus Contar Adolphi<sup>1</sup>, Romain Feron<sup>7</sup> , Dmitry Prokopov<sup>8</sup> , Alexey Makunin<sup>8</sup> , Ilya Kichigin<sup>8</sup>, Cornelia Schmidt<sup>1</sup>, Petra Fischer<sup>1</sup>, Heiner Kuhl<sup>3</sup>, Sven Wuertz<sup>3</sup>, Jörn Gessner<sup>3</sup>, Werner Kloas<sup>3</sup>, Cédric Cabau<sup>4,5</sup>, Carole Iampietro<sup>9</sup>, Hugues Parrinello<sup>10</sup>, Chad Tomlinson<sup>11</sup>, Laurent Journot<sup>10</sup>, John H. Postlethwait<sup>12</sup>, Ingo Braasch<sup>13</sup>, Vladimir Trifonov<sup>8</sup>, Wesley C. Warren<sup>14</sup>, Axel Meyer<sup>6</sup> , Yann Guiguen<sup>15</sup>  and Manfred Scharl<sup>2,16,17</sup>  

<sup>1</sup>Physiological Chemistry, Biocenter, University of Wuerzburg, Wuerzburg, Germany. <sup>2</sup>Developmental Biochemistry, Biocenter, University of Wuerzburg, Wuerzburg, Germany. <sup>3</sup>Leibniz-Institute of Freshwater Ecology and Inland Fisheries, IGB, Berlin, Germany. <sup>4</sup>Plate-forme Bio-informatique Genotoul, Mathématiques et Informatique Appliquées de Toulouse, INRA, Castanet-Tolosan, France. <sup>5</sup>SIGENAE, GenPhySE, Université de Toulouse, INRA, ENVT, Castanet-Tolosan, France. <sup>6</sup>Lehrstuhl für Zoologie und Evolutionsbiologie, Department of Biology, University of Konstanz, Konstanz, Germany. <sup>7</sup>Department of Ecology and Evolution, University of Lausanne, and Swiss Institute of Bioinformatics, Lausanne, Switzerland. <sup>8</sup>Institute of Molecular and Cellular Biology, Siberian Branch of the Russian Academy of Sciences, Novosibirsk State University, Novosibirsk, Russia. <sup>9</sup>INRAE, US 1426, GeT-PlaGe, Genotoul, Castanet-Tolosan, France. <sup>10</sup>Montpellier GenomiX (MGX), c/o Institut de Génomique Fonctionnelle, Montpellier, France. <sup>11</sup>McDonnell Genome Institute, Washington University School of Medicine, St. Louis, MO, USA. <sup>12</sup>Institute of Neuroscience, University of Oregon, Eugene, OR, USA. <sup>13</sup>Department of Integrative Biology, Michigan State University, East Lansing, MI, USA. <sup>14</sup>Bond Life Sciences Center, University of Missouri, Columbia, MO, USA. <sup>15</sup>INRA, UR1037 LPGP, Fish Physiology and Genomics, Rennes, France. <sup>16</sup>The Xiphophorus Genetic Stock Center, Department of Chemistry and Biochemistry, Texas State University, San Marcos, TX, USA. <sup>17</sup>Hagler Institute for Advanced Study and Department of Biology, Texas A&M University, College Station, TX, USA.   
e-mail: [matthias.stoock@igb-berlin.de](mailto:matthias.stoock@igb-berlin.de); [phch1@biozentrum.uni-wuerzburg.de](mailto:phch1@biozentrum.uni-wuerzburg.de)

In the format provided by the authors and unedited.

# The sterlet sturgeon genome sequence and the mechanisms of segmental rediploidization

Kang Du<sup>1,2</sup>, Matthias Stöck<sup>3</sup>  , Susanne Kneitz<sup>1</sup>, Christophe Klopp<sup>4,5</sup> , Joost M. Woltering<sup>6</sup>, Mateus Contar Adolphi<sup>1</sup>, Romain Feron<sup>7</sup> , Dmitry Prokopov<sup>8</sup> , Alexey Makunin<sup>8</sup> , Ilya Kichigin<sup>8</sup>, Cornelia Schmidt<sup>1</sup>, Petra Fischer<sup>1</sup>, Heiner Kuhl<sup>3</sup>, Sven Wuertz<sup>3</sup>, Jörn Gessner<sup>3</sup>, Werner Kloas<sup>3</sup>, Cédric Cabau<sup>4,5</sup>, Carole Iampietro<sup>9</sup>, Hugues Parrinello<sup>10</sup>, Chad Tomlinson<sup>11</sup>, Laurent Journot<sup>10</sup>, John H. Postlethwait<sup>12</sup>, Ingo Braasch<sup>13</sup>, Vladimir Trifonov<sup>8</sup>, Wesley C. Warren<sup>11</sup>, Axel Meyer<sup>6</sup> , Yann Guiguen<sup>14</sup>  and Manfred Schartl<sup>2,15,16</sup>  

<sup>1</sup>Physiological Chemistry, Biocenter, University of Wuerzburg, Wuerzburg, Germany. <sup>2</sup>Developmental Biochemistry, Biocenter, University of Wuerzburg, Wuerzburg, Germany. <sup>3</sup>Leibniz-Institute of Freshwater Ecology and Inland Fisheries, IGB, Berlin, Germany. <sup>4</sup>Plate-forme Bio-informatique Genotoul, Mathématiques et Informatique Appliquées de Toulouse, INRA, Castanet-Tolosan, France. <sup>5</sup>SIGENAE, GenPhySE, Université de Toulouse, INRA, ENVT, Castanet-Tolosan, France. <sup>6</sup>Lehrstuhl für Zoologie und Evolutionsbiologie, Department of Biology, University of Konstanz, Konstanz, Germany. <sup>7</sup>Department of Ecology and Evolution, University of Lausanne, and Swiss Institute of Bioinformatics, Lausanne, Switzerland. <sup>8</sup>Institute of Molecular and Cellular Biology, Siberian Branch of the Russian Academy of Sciences, Novosibirsk State University, Novosibirsk, Russia. <sup>9</sup>INRAE, US 1426, GeT-PlaGe, Genotoul, Castanet-Tolosan, France. <sup>10</sup>Montpellier GenomiX (MGX), c/o Institut de Génomique Fonctionnelle, Montpellier, France. <sup>11</sup>Bond Life Sciences Center, University of Missouri, Columbia, MO, USA. <sup>12</sup>Institute of Neuroscience, University of Oregon, Eugene, OR, USA. <sup>13</sup>Department of Integrative Biology, Michigan State University, East Lansing, MI, USA. <sup>14</sup>INRA, UR1037 LPGP, Fish Physiology and Genomics, Rennes, France. <sup>15</sup>The Xiphophorus Genetic Stock Center, Department of Chemistry and Biochemistry, Texas State University, San Marcos, TX, USA. <sup>16</sup>Hagler Institute for Advanced Study and Department of Biology, Texas A&M University, College Station, TX, USA.  e-mail: [matthias.stoeck@igb-berlin.de](mailto:matthias.stoeck@igb-berlin.de); [phch1@biozentrum.uni-wuerzburg.de](mailto:phch1@biozentrum.uni-wuerzburg.de)

## Supplementary Note

### The sterlet sturgeon genome sequence and the mechanisms of segmental rediploidization

Du Kang<sup>1</sup>, Matthias Stöck<sup>2,\*</sup>, Susanne Kneitz<sup>1</sup>, Christophe Klopp<sup>3</sup>, Joost Woltering<sup>4</sup>, Mateus Adolfi<sup>1</sup>, Romain Feron<sup>5</sup>, Dmitry Prokopov<sup>6</sup>, Alexey Makunin<sup>6</sup>, Ilya Kichigin<sup>6</sup>, Cornelia Schmidt<sup>1</sup>, Petra Fischer<sup>1</sup>, Heiner Kuhl<sup>2</sup>, Sven Wuertz<sup>2</sup>, Jörn Gessner<sup>2</sup>, Werner Kloas<sup>2</sup>, Cedric Cabau<sup>3</sup>, Carole Iampietro<sup>7</sup>, Hugues Parrinello<sup>8</sup>, Chad Tomlinson<sup>9</sup>, Laurent Journot<sup>8</sup>, John H. Postlethwait<sup>10</sup>, Ingo Braasch<sup>11</sup>, Vladimir Trifonov<sup>6</sup>, Wesley C. Warren<sup>9,12</sup>, Axel Meyer<sup>4</sup>, Yann Guiguen<sup>13</sup>, Manfred Schartl<sup>14,15,16\*</sup>

<sup>1</sup> Physiological Chemistry, Biocenter, University of Wuerzburg, 97074 Wuerzburg, Germany

<sup>2</sup> Leibniz-Institute of Freshwater Ecology and Inland Fisheries, IGB, Müggelseedamm 301, D-12587 Berlin, Germany

<sup>3</sup> Plate-forme Bio-informatique Genotoul, Mathématiques et Informatique Appliquées de Toulouse, INRA, Castanet Tolosan, France and SIGENAE, GenPhySE, Université de Toulouse, INRA, ENVT, Castanet Tolosan, France

<sup>4</sup> Lehrstuhl für Zoologie und Evolutionsbiologie, Department of Biology, University of Konstanz, Universitätsstraße 10, 78457 Konstanz, Germany

<sup>5</sup> Department of Ecology and Evolution, University of Lausanne, and Swiss Institute of Bioinformatics, 1015 Lausanne, Switzerland.

<sup>6</sup> Institute of Molecular and Cellular Biology, Siberian Branch of the Russian Academy of Sciences, Novosibirsk State University, 630090 Novosibirsk, Russia.

<sup>7</sup> INRA, US 1426, GeT-PlaGe, Genotoul, Castanet-Tolosan, France

<sup>8</sup> Montpellier GenomiX (MGX), c/o Institut de Génomique Fonctionnelle, 141 rue de la cardonille, 34094 Montpellier Cedex 05, France

<sup>9</sup> Bond Life Sciences Center, University of Missouri, Columbia, MO USA

<sup>10</sup> Institute of Neuroscience, University of Oregon, Eugene, Oregon, OR 97401, USA

30 <sup>11</sup> Department of Integrative Biology, Michigan State University, MI 48824, USA

31 <sup>12</sup> Bond Life Sciences Center, University of Missouri, Columbia, MO, USA

32 <sup>13</sup> INRA, UR1037 LPGP, Fish Physiology and Genomics, F-35042 Rennes, France

33 <sup>14</sup> The Xiphophorus Genetic Stock Center, Department of Chemistry and Biochemistry,  
34 Texas State University, San Marcos, Texas, USA

35 <sup>15</sup> Hagler Institute for Advanced Study and Department of Biology, Texas A&M University,  
36 College Station, Texas 77843, USA

37 <sup>16</sup> Developmental Biochemistry, Biocenter, University of Wuerzburg, 97074 Wuerzburg,  
38 Germany

39

40 \* Corresponding authors

41

42

43

44

45

46

47

48

49

50

51

52

53

54

55

56

57

58

59

60

## 61 **Supplementary Note 1. Genome assembly**

62 The first smartdenovo assembly of the PacBio reads had a length of 1.56 Gb  
63 (Supplementary Table 1) which is 16.1% lower than the expected 1.86-1.87  
64 (<http://www.genomesize.com>) and showed multiple contigs having twice the expected raw  
65 read coverage. 1193 contigs, corresponding to 280 Mb had a twice larger depth as expected  
66 and were processed with freebayes, HAPCUT2, fgbio and vcf-consensus to generate  
67 haplotyped contigs. Only 83 contigs did not end in a single haplotyped segment and had to  
68 be split in different sub-contigs. 1,110 contigs were haplotyped as a single segment. The  
69 single and multiple segment haplotype contigs corresponded to 472 Mb and 88 Mb,  
70 respectively. The re-duplication led to an assembly size of 1.84 Gb and the assembly did  
71 not present the double coverage pattern (Supplementary Table 1). In the following step the  
72 Hi-C data were used for scaffolding and manual inspection, which decreased assembly size  
73 to 1.8Gb because all re-duplicated contigs showing no link to other contigs were removed.

## 74 **Supplementary Note 2. B chromosome**

75 B chromosomes (Bs) are enigmatic accessory elements to the regular chromosome set (A).  
76 They are found in some but not all individuals within a population and are considered either  
77 non-functional, beneficial or harmful<sup>1</sup>. B chromosome refers to those chromosomes that  
78 are essential for life and may be lacking in some individuals<sup>1</sup>. For scaffold 60 we noticed  
79 a high content of repeat elements (89.7%) and only three low quality genes annotated (two  
80 failed to be supported by transcript evidence, another showing protein similarity to  
81 XP\_028669235 but is only a fragment of a full length orthologue) (Supplementary Table  
82 2). Additionally, the gene evidence from homology collected for scaffold 60 revealed that  
83 all protein alignments either contained frameshift/premature stop or a fragmented  
84 alignment (< 30% alignment). When assembled transcripts from the RNA-seq data were  
85 used, all mapped transcripts had no blast hit to the NR database. Moreover, no ncRNA was  
86 found on this scaffold. Taking together, scaffold 60 most probably represents a fully  
87 assembled B-chromosome.

## 88 **Supplementary Note 3. Relative rate of gene evolution**

89 To compare the molecular evolutionary rate between the sterlet lineage and the other fish,  
90 we first collected 275 one-to-one orthologs among sterlet, medaka, platyfish, fugu,

91 zebrafish, arapaima, arowana, spotted gar, coelacanth, elephant shark and sea lamprey.  
92 Protein sequences for each ortholog were aligned using MUSCLE and trimmed using  
93 trimAl. The 275 alignments were then concatenated into a super-alignment. From this we  
94 reconstructed phylogenomic trees using RAxML and MrBayes respectively. In particular,  
95 from the super alignment we retrieved the Fourfold Degenerate Synonymous Site (4DTV)  
96 and used it to optimize the branch length of RAxML tree. Hence in total we obtained three  
97 phylogenomic trees to compare molecular evolutionary rate between different lineages.

98 Lineage pairwise distance was calculated using cophenetic.phylo<sup>2</sup> for all three trees  
99 (Supplementary Table 4). With sea lamprey as outgroup we found that sterlet evolved  
100 almost as slow as coelacanth or elephant shark, and clearly slower than teleosts.

101 Surprisingly, suggested by Tajima's relative rate test and two-cluster test implemented by  
102 MEGA7 (<https://www.megasoftware.net/>) and LINTRE  
103 (<http://www.kms.ac.jp/~genomelb/takezaki/lintre/index.html>) respectively  
104 (Supplementary Table 5, 6), sterlet is the slowest evolving in comparison with elephant  
105 shark, coelacanth and gar.

#### 106 **Supplementary Note 4. Time inference for the sterlet whole genome** 107 **duplication**

108 The age of WGDs were normally deduced linearly based on the pairwise dS (synonymous  
109 substitutions) values of ortholog pairs and the amount of MY (million year) a dS unit  
110 represents<sup>3 4</sup>. However, synonymous substitutions in different lineage are accumulated in  
111 different speed, hence it is important to make calibration from an event happened in the  
112 lineage or a close lineage. In a previous study, the age of Ss4R (salmonid-specific 4th WGD)  
113 was deduced to ~100 mya based the divergence time of Atlantic salmon and rainbow trout.  
114 Our recalculation revealed the same results, however, when used as the calibration the  
115 divergence time of rainbow trout and spotted gar, Ss4R was wrongly estimated to 33 mya  
116 (Supplementary Table 21).

117 Given the ancient origin and slow molecular evolutionary rate of sterlet, the divergence of  
118 sterlet and spotted gar is hardly to be an appropriate calibration. Instead we made use of  
119 the available transcriptomes of five sturgeon species (*Acipenser baerii*, *Acipenser*

120 *oxyrinchus*, *Acipenser schrencki*, *Acipenser sinensis* and *Acipenser transmontanus*;  
121 <http://publicsturgen.org/home.html>). Among the five sturgeons, spotted gar,  
122 arapaima, Asian arowana, medaka, fugu, zebrafish and spotted gar; 387 one-to-one  
123 orthologs were identified to reconstruct the phylogeny tree using RAxML 8.2.9 and  
124 MrBayes 3.2.6<sup>5 6</sup>; and to infer the divergence time using MCMCTree<sup>7</sup> (Supplementary Fig.  
125 6a). The result is mainly in agreement with a previous study<sup>8</sup>.

126 We then calculated the pairwise dS for 9914 sterlet ohnolog pairs, 9009 one-to-one  
127 orthologous pairs between sterlet and *A. baerii*, 7893 between sterlet and *A. sinensis*, 8540  
128 between sterlet and *A. schrencki*, 7939 between sterlet and *A. transmontanus*, and 6289  
129 between sterlet and *A. oxyrinchus* using codeML under “-runmodel=-2” (Supplementary  
130 Fig. 6b; Supplementary Table 10). Results with S\*dS <=1 were discarded. The alignment  
131 between two sequences was first constructed using MAFFT<sup>9</sup> in amino acid sequence then  
132 translated to coding sequence using pal2nal<sup>10</sup>.

133 According to the results, the pairwise dS between sterlet ohnolog pairs (median value 0.068)  
134 is even larger than that of one-to-one orthologous pairs between sterlet and *A. oxyrinchus*  
135 (median value 0.059), indicating the WGD happened before the divergence of sterlet and  
136 *A. oxyrinchus*. To verify that we collected 8159 pairs of sterlet ohnolog with their orthologs  
137 in the five other sturgeon species and constructed gene tree for each group using TreeBeST  
138 0.5.1<sup>11</sup>. Topology of gene trees confirmed that the WGD happened before the divergence  
139 of sterlet and *A. oxyrinchus* (for examples see Supplementary Fig. 26).

140 Given that the dS value between sterlet and *A. oxyrinchus* and that among sterlet ohnolog  
141 pairs is closest, we use their divergence as the time calibration, and deduced that the WGD  
142 happened at around 170 (121~237) mya.

### 143 **Supplementary Note 5. DNA sequence alignment revealing ohnology** 144 **and arm exchange between chromosomes in sterlet**

145 According to the chord diagram of sterlet (Fig. 2b), chromosome 1 and 2, 3 and 4, 5 and 6,  
146 8 and 9 show homoeology and common ancestry over their whole lengths, while  
147 chromosome 7, 10-31 and 36 reveal more complex structural relations. The remaining  
148 small chromosomes (32-35 and 37-55) have lost their homeologous counterpart completely.

149 To verify this pattern, we aligned the DNA sequences of those homeologous chromosome  
150 pairs using LAST (<http://last.cbrc.jp/>) under instruction of example “2017 human-ape  
151 alignments” (<https://github.com/mcfrith/last-genome-alignments>). Alignments with error  
152 probability > 1e-8 were discarded.

153 The results confirmed the homeology relationships as revealed in the chord diagram  
154 (Supplementary Fig. 7, 8, 13), and deciphered a history of chromosomal translocations and  
155 inversions. Intriguingly, the break of homology frequently is located in the centre of the  
156 metacentric chromosomes. A peak of repeat element content in the same region can be  
157 taken as evidence that these are the centromeres (Supplementary Fig. 8, 11), and that entire  
158 chromosome arms were reciprocally exchanged.

### 159 **Supplementary Note 6. Sequencing of single sterlet chromosomes** 160 **validates genome wide assembly and ohnology relationships**

161 We studied several pairs of sterlet paralogous chromosomes with different morphology:  
162 the paralogous pairs of large chromosomes ARU1/ARU2, ARU3/ARU4, ARU5/ARU6,  
163 ARU8/9 and two paralogous regions on chromosome ARU7.

164 We previously generated chromosome-specific sequence libraries from microdissected *A.*  
165 *ruthenus* metaphase chromosomes<sup>12,13</sup> (Supplementary Fig. 9). Following amplification  
166 and Illumina sequencing, the datasets representing sterlet chromosomes ARU1, ARU2,  
167 ARU3, ARU4, ARU5, ARU6, ARU7, ARU8, ARU9, ARU13 and ARU14 were obtained.  
168 We applied DOPseq to analyze each dataset<sup>14</sup> (<https://github.com/lca-imcb/dopseq>): we  
169 aligned the reads from chromosome specific library onto sterlet scaffolds. We only  
170 analyzed regions with p-value <0.01.

171 Most reads from sequenced chromosomes (ARU1 - ARU9) densely marked corresponding  
172 scaffolds (from HiC\_scaffold\_1 to HiC\_scaffold\_9). Besides, reads from each  
173 chromosome revealed additional signals on paralogous scaffolds (or scaffold parts)  
174 (Supplementary Fig. 10; Supplementary Data 1).

175 This confirmed previously obtained physical mapping data, when single chromosome  
176 microdissection derived libraries painted in whole mount in-situ hybridizations two  
177 paralogous regions in sterlet genome<sup>12</sup>.



178 Thus, using sequences from microdissected sterlet chromosomes we could unambiguously  
179 assign scaffolds to physical chromosomal regions and determined paralogous regions.

### 180 **Supplementary Note 7. Double conserved synteny, identification of** 181 **ohnolog/singleton, and WGD retention rate**

182 A WGD in the sterlet genome is suggested by a dS plot of sterlet paranome<sup>15</sup>  
183 (Supplementary Fig. 5).

184 To confirm and reveal the WGD pattern of sterlet, we mapped 18341 gar genes  
185 ([http://www.ensembl.org/Lepisosteus\\_oculatus/Info/Annotation](http://www.ensembl.org/Lepisosteus_oculatus/Info/Annotation)) to the sterlet genome.  
186 Based on sequence similarity and conserved microsynteny (at least four genes arranged in  
187 a row with a gap of less than 15 genes), 12216 gar genes were confirmed as single-copy  
188 orthologs to 22211 sterlet genes (Supplementary Table 9). 8764 gar genes mapped onto  
189 two different sterlet chromosomes, while 3452 genes interspersed between ohnologs  
190 mapped only to one sterlet chromosome, resulting in a WGD retention rate of 71.7%.

191 Considering a single species as outgroup (here: species that did not undergo the WGD)  
192 may cause reduced identification of orthologs and thus ohnologs or singletons. Hence, we  
193 added coelacanth and elephant shark as outgroup to identify ohnologs and singletons in  
194 sterlet. We first included 11765 pairs of paralogs in sterlet that have only a single-copy  
195 ortholog in gar, coelacanth or elephant shark, then confirmed 9914 of them to show  
196 paralogous synteny (at least 5 genes ranked in a row with a gap of less than 15 genes).  
197 These genes are considered to be high fidelity ohnologs. For detailed information about  
198 location and corresponding single-copy genes in outgroup species see Table sterlet\_ohno  
199 for DCS checking (Supplementary Table 8).

200 With this conservative criterion, we also identified 10050 ohnolog pairs in Atlantic salmon  
201 and 10210 in rainbow trout, as results from the Ss4R; 8383 in goldfish, resulting from the  
202 carp WGD (Cs4R). To depict ohnology relationship between chromosomes, we  
203 investigated on which chromosome each ohnolog is located, and generated the chord  
204 diagram for sterlet (Fig. 2b), goldfish, rainbow trout (Supplementary Fig. 24) and Atlantic  
205 salmon (Supplementary Fig. 27) using circos<sup>16</sup> or package “circlize” in R<sup>17</sup>.

206 Singletons were defined as those genes with “one to one” orthology in other species which  
207 did not experience the WGD. We identified 4175 singletons in sterlet, 8832 in Atlantic  
208 salmon, 8998 in rainbow trout and 6754 in goldfish, as results from the rediploidization of  
209 the corresponding special WGD. The presence of 9914 ohnolog pairs and 4175 singletons  
210 in sterlet results in a duplicate retention rate of 70%, confirming to the estimation from the  
211 DCS analysis above.

212 The remaining genes (“undefined genes”) were neither categorized as ohnolog or singleton  
213 from the latest WGD, either because their single-copy orthology relationships were lost in  
214 the species that did not experience this WGD or because they resulted from an older WGD,  
215 or because they had relationships other than 1:1 or 2:1 (which means the gene is a local  
216 duplication in either one or both species).

217 To reveal the pattern of deduplication all ohnologs, singletons, undefined genes and their  
218 location information on chromosomes, were depicted for sterlet, goldfish, Atlantic salmon  
219 and rainbow trout on loci-plots (Supplementary Fig. 12).

## 220 **Supplementary Note 8. Gene fate after Ars3R**

221 Deduplication, subfunctionalization and neofunctionalization are suggested to be the three  
222 possible fates of gene pairs after gene duplication<sup>18</sup>. The dN/dS value and expression  
223 patterns can give clues for investigating the fate of paralogous genes.

224 In sterlet, we found 4175 singletons and 9914 pairs of ohnolog, indicating a 70-%  
225 deduplication rate as a result from Ars3R, higher to the rates in goldfish (43.7%), Atlantic  
226 salmon (46.7%) and rainbow trout (46.9%, despite the different time when each WGD  
227 had happened (sterlet ~180mya, goldfish ~14mya and salmonids ~95mya) (Supplementary  
228 Table 11). dN/dS value was calculated to evaluate the selection pressure. For each singleton  
229 or ohnolog pair, we collected their one-copy orthologs in other species. Protein sequences  
230 were aligned using MAFFT<sup>19</sup> and transformed to CDS using pal2nal<sup>10</sup>. Gaps were trimmed  
231 using Gblocks<sup>20</sup>. Then for each alignment, an unrooted gene tree was reconstructed using  
232 QuickTree 2.5 guided by the species phylogeny<sup>21</sup>. We calculated the dN/dS value using  
233 codeML under branch-free model. No GO terms are significantly enriched for the common  
234 singletons (using *fdr-p* value).

235 When the dN/dS values were compared between sterlet singletons and ohnologs, we found  
236 that ohnolog present a higher percentage with high dN/dS values than singleton  
237 (Supplementary Fig. 20), indicating less stringent purifying selection on ohnologs.

238 To test for positive selection of each ohnolog pair, we implemented an LRT (likelihood-  
239 ratio test) between two pairwise models using PAML<sup>7</sup>. In the null model we set the omega  
240 to 0.5, while in the alternative model, the omega was freely estimated. Only those ohnolog  
241 pairs with LRT p-value smaller than 0.05, alternative lnL (log-Likelihood) larger than null  
242 lnL and the estimated omega higher than 0.5 were scored as being under positive selection.  
243 Out of 9914 ohnolog pairs of sterlet 207 such pairs were found.

244 To investigate the expression status of ohnologs we extracted the TPM for each paralog  
245 from the RNA-seq data of 23 different sterlet organs and developmental stages. To be able  
246 to assign reads with high confidence to one of the ohnologs we filtered the alignment file  
247 for uniquely aligned reads with no mismatches. Genes with either no discriminating SNPs  
248 or unexpressed in any of the samples (TPM<5) were excluded from further analyses  
249 (n=671). The remaining 4369 pairs were categorized either as either showing similar  
250 expression from both ohnologs in all samples (n=1139) or showing different expression  
251 patterns in at least two samples (n= 3230) (Supplementary Fig. 16, 28). Within the last  
252 group we found 38 pairs with only one gene expressed in all samples, the other being  
253 unexpressed in all samples (Supplementary Fig. 28). For 341 ohnolog pairs duplicates  
254 expression was partitioned between different organs or developmental stages, indicating  
255 subfunctionalization.

## 256 **Supplementary Note 9. Comparison of the conservation of synteny from** 257 **Ars3R with other WGDs**

258 To compare the Ars3R with the teleost WGDs the gar genome was used as reference. 16243  
259 spotted gar genes and their “1 to X” ( $X \geq 1$ ) orthologs in Atlantic salmon, rainbow trout,  
260 goldfish, zebrafish, medaka, arapaima and sterlet were investigated. To identify duplicated  
261 genes, which are the result of a WGD rather than local gene duplications, we only included  
262 those rows with pairwise synteny confirmed, meaning at least 4 genes to be ranked in a  
263 row with gap size of less than 15 genes.

264 In the end, 15216 gar genes were kept for the analysis. By checking their orthologs'  
265 location on chromosomes, we found 27 genes with their orthologs located on at least two  
266 different chromosomes in sterlet, arapaima, zebrafish, medaka, and on at least four  
267 chromosomes in Atlantic salmon, rainbow trout and goldfish (Supplementary Table 12),  
268 indicating they were always retained after WGDs. In addition, 191 genes have their  
269 orthologs always located on one chromosome in each species, indicating they were always  
270 deduplicated (Supplementary Table 13).

271 To investigate if these genes were retained or deduplicated by chance, we ran 10,000 time  
272 simulations under a stochastic process of keeping or losing duplication after WGDs  
273 (Supplementary Fig. 17). Results show that the observed counts are always higher than  
274 expectation distribution, indicating that number of commonly retained or duplicate lost  
275 gene is above the stochastic expectation.

276 Intriguingly, according to their location on gar chromosomes, we found amongst the 191  
277 genes that always were deduplicated 102 genes neighboring each other (with in between  
278 not more than 5 genes); and 39 genes arranged in 8 synteny blocks (with at least 4 genes  
279 in a row a gap of less than 15 genes). These are significantly higher numbers than under  
280 expectation of a random process (10,000 bootstraps of 191 no-return resampling from the  
281 15216 gar genes; Supplementary Fig. 18, 19), indicating it is not a stochastic process. In  
282 summary, this indicates that many genes evolved dependent on their physical distance,  
283 namely, that if one gene is lost this leads to the “death” of its neighbor.

#### 284 **Supplementary Note 10. Expansion and contraction of gene families**

285 CAFE 4.2<sup>22</sup> was used to analyze the dynamic of gene family size. We imported the gene  
286 group (family) size resulting from Hcluster\_sg, and a corresponding species tree adapted  
287 from TIMETREE database (<http://www.timetree.org/>). Gene families were defined by  
288 clustering 445,487 genes from 15 species after an all vs. all blast. Since CAFE assumes  
289 that each family has at least one gene at the root of the tree, we only included those gene  
290 families into the analysis that occur in more than 12 branches. Also failure of CAFE could  
291 be caused by a very large change in gene family size on a single branch. 8,139 gene families  
292 are present in the most recent common ancestor (MRCA) of all taxa and have <100 gene  
293 copies, hence qualified for the analysis of gene family size dynamics. We put aside the

294 gene families with one or more species that have  $\geq 100$  gene copies, and analyzed them  
295 later with estimated parameter values.

296 To build model 1, we set that all the branches share a single changing rate ( $\lambda$ ), and ran 1000  
297 Monte Carlo random samplings with p value threshold of 0.01 to search for the  $\lambda$  value.  
298 Then we built model 2 by setting different  $\lambda$  for the branches leading to sterlet branch,  
299 representing Ars3R; to Atlantic salmon, rainbow trout, and goldfish, representing the Ss4R  
300 and Cs4R, to the rest of teleost branches, representing branches that only underwent the  
301 Ts3R; and to the rest of the tree (underwent 1R and 2R). The two models were compared  
302 by a likelihood test based on 100 simulations. The results suggested that model 2 fit better  
303 than model 1, and the branches with 4R and Ars3R ( $\lambda$  0.0062 and 0.0017) have their gene  
304 family changed much faster than in branches with more ancient polyploidization ( $\lambda$  0.0007  
305 and 0.0004).

306 Since model 2 had a better fit it was used to parse the gene family size data. At last, a gene  
307 family was reported as significantly changed in size only when the p value was  $<0.01$ . In  
308 goldfish, 597 gene families expanded and five contracted, in Atlantic salmon ten expanded,  
309 in rainbow trout two expanded and one contracted, in sterlet 63 expanded and three  
310 contracted (Supplementary Table 22). No common gene family was detected to expand or  
311 contract in all four tetraploid lineages.

### 312 **Supplementary Note 11. Ab-initio annotation of zp gene family**

313 To identify zona pellucida genes in sterlet, arapaima, coelacanth, elephant shark, gar,  
314 goldfish, medaka, Atlantic salmon, Tanaka snailfish, rainbow trout, zebrafish  
315 (Supplementary Table 20), Antarctic blackfin icefish<sup>23</sup>, Mariana hadal snailfish and Tanaka  
316 snailfish<sup>24</sup>, we adapted the method used for identification of olfactory receptor genes<sup>25</sup>.  
317 First we collected 117 zona pellucida proteins from the previous study<sup>26</sup>, and used them as  
318 query to blast to the assemblies using blastp<sup>27</sup>. Results with alignment less than 40 aa were  
319 discarded. Then to determine the gene structure, each query protein was aligned to its hit  
320 region using GeneWise<sup>28</sup>. This method identified 130 zona pellucida genes in Antarctic  
321 blackfin icefish, similar to<sup>23</sup> and 116 in sterlet.

322 **Supplementary Note 12. Evolution of sterlet Hox clusters after genome**  
323 **tetraploidization and inference of the ancestral vertebrate Hox**  
324 **complement**

325 *Hox* genes are highly conserved developmentally active transcription factors, which have  
326 been widely used to understand gene evolution after genome duplications, generally within  
327 the context of subfunctionalization, degeneration or neofunctionalization<sup>29</sup>. The genomic  
328 history of vertebrate *Hox* clusters was shaped by the 1R and 2R rounds of duplication  
329 leading to four original gnathostome *Hox* clusters (*Hoxa-d*) that are maintained as the  
330 minimal *Hox* complement in all vertebrates. After their 3R duplication, the rapidly  
331 evolving teleosts underwent extensive loss and remodelling of their initial eight *Hox*  
332 clusters (*Hoxaa - Hoxdb*)<sup>30-34</sup> as well as subsequent subfunctionalization of ohnologs<sup>35,36</sup>.  
333 Analysis of the sterlet genome finds 88 *hox* genes arranged in eight clusters (Fig. 4a). An  
334 intact *hoxd14* gene is present on chromosome 12 whereas the *hoxd14* ohnolog on  
335 chromosome 10 has been pseudogenized through several frameshift mutations in exon1  
336 and exon2. Interestingly, selective loss of one *hoxd14* ohnolog has apparently  
337 independently occurred in Polyodon<sup>37</sup>. No further loss or pseudogenization of *hox* genes  
338 was detected. Therefore, the fates of *hox* genes following genome duplications in sterlet  
339 and teleosts differs strongly. LAGAN Vista comparison of the *hoxd* flanking gene deserts,  
340 which are involved in the long-range transcriptional regulation of the cluster<sup>38-41</sup>, indicates  
341 that all ultra conserved elements shared with gar are retained in each of the sterlet's  
342 ohnologous *hoxd* synteny regions (Supplementary Fig. 21). This suggests that the low  
343 divergence of the sterlet *Hox* clusters extends to their regulatory regions and strengthens  
344 the hypothesis of a slow post-tetraploidization evolution. *Hoxa14*, *hoxd5* or *hoxb14* were  
345 not detected in the slowly evolving sterlet genome. This indicates an extreme stability of  
346 the number of *hox* genes present in the early branching ray finned fish, with an identical  
347 *hox* complement in gar and sterlet, that share a last common ancestor ~335MYA. This  
348 provides further evidence for a scenario whereby *hoxd5* and *hoxb14* were lost in the  
349 common ancestor of bony vertebrates (Osteichthyes) and *hoxa14* in the common ancestor  
350 of actinopterygians<sup>41</sup> (Figure hox/b

351 **Supplementary Note 13. Glutamate receptor ohnolog retention**  
352 **following the sterlet genome duplication**

353 We and others have previously found that following the Teleost WGD (Ts3R), nervous  
354 system and neuronal genes with functions in cognition and/or behavior particularly often  
355 escaped the non-functionalization fate and were over-retained in teleosts as ohnologous  
356 pairs compared to the genome-wide background TGD ohnolog retention rate [e.g.<sup>42-44</sup>].

357 Our previous survey<sup>42</sup> furthermore revealed that among these nervous system genes,  
358 glutamate receptor (GRGs) genes show particularly high Ts3R ohnolog retention rates:  
359 clupeocephalan teleosts such as medaka and zebrafish have retained 74.1% and 70.4%  
360 (20/27 and 19/27; Supplementary Fig. 22; Supplementary Table 18) of GRGs as Ts3R  
361 ohnologous pairs, respectively, even after more than 200 million years since the Ts3R  
362 duplication event. This exceptionally high ohnolog retention rate is seen across teleost  
363 lineages, as e.g. the distantly related osteoglossiform teleost arowana has kept 70.4%  
364 (19/27; Supplementary Fig. 22; Supplementary Table 18) of GRG Ts3R ohnologs as well.

365 Here we asked whether a convergent trend is observed following the sterlet whole genome  
366 duplication (Ars3R) event. Using the gene annotation as a guide, we generated a manually  
367 curated annotation of sterlet orthologs of 27 GR genes of both the metabotropic and  
368 ionotropic type as present in the spotted gar. Spotted gar thereby serves as an “unduplicated”  
369 ray-finned outgroup to both the sterlet and the teleost genome duplications.

370 An overview of our GRG ohnolog survey in sterlet compared to human, gar, and the teleost  
371 representatives zebrafish, medaka, and arowana is shown (Supplementary Fig. 22);  
372 accession numbers are given (Supplementary Table 18).

373 Of the 27 GRGs present in gar, 26 were at least present in one copy in the sterlet genome.  
374 Ionotropic NMDA gene *grin2B* was not found in the sterlet genome at all. At this point,  
375 we cannot distinguish between a loss of this gene in the sturgeon lineage before the Ars3R  
376 event or independent losses of both Ars3R ohnologs following duplication. Hence, *grin2B*  
377 was excluded from calculating the Ars3R GRG ohnolog retention rate for sterlet.

378 We found that 23 of 26 GR genes have retained their Ars3R ohnolog after the sterlet-  
379 specific genome duplication, resulting in an ohnolog retention rate of 88.5%, which is

380 significantly higher than the genome-wide Ars3R ohnolog retention rate of 70% [8,534  
381 Ars3R ohnolog pairs. Thus, GRG genes have been convergently over-retained following  
382 the Ars3R and Ts3R genome duplication events compared to the genome-wide average  
383 although to a lower extent in sterlet than in teleosts.

384

385

- 386 1 Valente, G. T. *et al.* B chromosomes: from cytogenetics to systems biology.  
387 *Chromosoma* **126**, 73-81 (2017).
- 388 2 Paradis, E., Claude, J. & Strimmer, K. APE: analyses of phylogenetics and  
389 evolution in R language. *Bioinformatics* **20**, 289-290 (2004).
- 390 3 Berthelot, C. *et al.* The rainbow trout genome provides novel insights into  
391 evolution after whole-genome duplication in vertebrates. *Nature*  
392 *communications* **5**, 3657 (2014).
- 393 4 Chen, Z. *et al.* De novo assembly of the goldfish (*Carassius auratus*) genome and  
394 the evolution of genes after whole-genome duplication. *Science Advances* **5**,  
395 eaav0547 (2019).
- 396 5 Ronquist, F. *et al.* MrBayes 3.2: efficient Bayesian phylogenetic inference and  
397 model choice across a large model space. *Systematic biology* **61**, 539-542 (2012).
- 398 6 Stamatakis, A. RAxML version 8: a tool for phylogenetic analysis and post-  
399 analysis of large phylogenies. *Bioinformatics* **30**, 1312-1313 (2014).
- 400 7 Yang, Z. PAML 4: phylogenetic analysis by maximum likelihood. *Molecular*  
401 *biology and evolution* **24**, 1586-1591 (2007).
- 402 8 Luo, D. *et al.* Highly Resolved Phylogenetic Relationships within Order  
403 Acipenseriformes According to Novel Nuclear Markers. *Genes* **10**, 38 (2019).
- 404 9 Castresana, J. Selection of conserved blocks from multiple alignments for their  
405 use in phylogenetic analysis. *Molecular biology and evolution* **17**, 540-552 (2000).
- 406 10 Suyama, M., Torrents, D. & Bork, P. PAL2NAL: robust conversion of protein  
407 sequence alignments into the corresponding codon alignments. *Nucleic acids*  
408 *research* **34**, W609-W612 (2006).
- 409 11 Ponting, C. (2007).
- 410 12 Romanenko, S. A. *et al.* Segmental paleotetraploidy revealed in sterlet  
411 (*Acipenser ruthenus*) genome by chromosome painting. *Molecular cytogenetics*  
412 **8**, 90 (2015).
- 413 13 Andreyushkova, D. *et al.* Next generation sequencing of chromosome-specific  
414 libraries sheds light on genome evolution in paleotetraploid sterlet (*Acipenser*  
415 *ruthenus*). *Genes* **8**, 318 (2017).
- 416 14 Makunin, A. I. *et al.* Contrasting origin of B chromosomes in two cervids (Siberian  
417 roe deer and grey brocket deer) unravelled by chromosome-specific DNA  
418 sequencing. *BMC genomics* **17**, 618 (2016).
- 419 15 Maere, S. *et al.* Modeling gene and genome duplications in eukaryotes.  
420 *Proceedings of the National Academy of Sciences* **102**, 5454-5459 (2005).



421 16 Krzywinski, M. *et al.* Circos: an information aesthetic for comparative genomics.  
422 *Genome research* **19**, 1639-1645 (2009).

423 17 Gu, Z., Gu, L., Eils, R., Schlesner, M. & Brors, B. circlize implements and enhances  
424 circular visualization in R. *Bioinformatics* **30**, 2811-2812 (2014).

425 18 Lien, S. *et al.* The Atlantic salmon genome provides insights into rediploidization.  
426 *Nature* **533**, 200 (2016).

427 19 Nakamura, T., Yamada, K. D., Tomii, K. & Katoh, K. Parallelization of MAFFT for  
428 large-scale multiple sequence alignments. *Bioinformatics* **34**, 2490-2492 (2018).

429 20 Talavera, G. & Castresana, J. Improvement of phylogenies after removing  
430 divergent and ambiguously aligned blocks from protein sequence alignments.  
431 *Systematic biology* **56**, 564-577 (2007).

432 21 Howe, K., Bateman, A. & Durbin, R. QuickTree: building huge Neighbour-Joining  
433 trees of protein sequences. *Bioinformatics* **18**, 1546-1547 (2002).

434 22 De Bie, T., Cristianini, N., Demuth, J. P. & Hahn, M. W. CAFE: a computational  
435 tool for the study of gene family evolution. *Bioinformatics* **22**, 1269-1271 (2006).

436 23 Kim, B.-M. *et al.* Antarctic blackfin icefish genome reveals adaptations to  
437 extreme environments. *Nature ecology & evolution* **3**, 469 (2019).

438 24 Wang, K. *et al.* Morphology and genome of a snailfish from the Mariana Trench  
439 provide insights into deep-sea adaptation. *Nature ecology & evolution* **3**, 823  
440 (2019).

441 25 Niimura, Y. On the origin and evolution of vertebrate olfactory receptor genes:  
442 comparative genome analysis among 23 chordate species. *Genome Biology and  
443 Evolution* **1**, 34-44 (2009).

444 26 Cao, L. *et al.* Neofunctionalization of zona pellucida proteins enhances freeze-  
445 prevention in the eggs of Antarctic notothenioids. *Nature communications* **7**,  
446 12987 (2016).

447 27 Camacho, C. *et al.* BLAST+: architecture and applications. *BMC bioinformatics* **10**,  
448 421 (2009).

449 28 Birney, E., Clamp, M. & Durbin, R. GeneWise and genomewise. *Genome research*  
450 **14**, 988-995 (2004).

451 29 Meyer, A. & Van de Peer, Y. From 2R to 3R: evidence for a fish - specific genome  
452 duplication (FSGD). *Bioessays* **27**, 937-945 (2005).

453 30 Amores, A. *et al.* Zebrafish hox clusters and vertebrate genome evolution.  
454 *Science* **282**, 1711-1714 (1998).

455 31 Mungpakdee, S. *et al.* Differential evolution of the 13 Atlantic salmon Hox  
456 clusters. *Mol Biol Evol* **25**, 1333-1343, doi:10.1093/molbev/msn097 (2008).

457 32 Martin, K. J. & Holland, P. W. Enigmatic orthology relationships between Hox  
458 clusters of the African butterfly fish and other teleosts following ancient whole-  
459 genome duplication. *Mol Biol Evol* **31**, 2592-2611, doi:10.1093/molbev/msu202  
460 (2014).

461 33 Kuraku, S. & Meyer, A. The evolution and maintenance of Hox gene clusters in  
462 vertebrates and the teleost-specific genome duplication. *Int J Dev Biol* **53**, 765-  
463 773, doi:10.1387/ijdb.072533km (2009).

464 34 Woltering, J. M. & Durston, A. J. The zebrafish hoxDb cluster has been reduced to  
465 a single microRNA. *Nat Genet* **38**, 601-602, doi:10.1038/ng0606-601 (2006).

466 35 McClintock, J. M., Kheirbek, M. A. & Prince, V. E. Knockdown of duplicated  
467 zebrafish hoxb1 genes reveals distinct roles in hindbrain patterning and a novel  
468 mechanism of duplicate gene retention. *Development* **129**, 2339-2354 (2002).

469 36 Takamatsu, N. *et al.* Duplicated Abd-B class genes in medaka hoxAa and hoxAb  
470 clusters exhibit differential expression patterns in pectoral fin buds. *Dev Genes*  
471 *Evol* **217**, 263-273, doi:10.1007/s00427-007-0137-4 (2007).

472 37 Crow, K. D., Smith, C. D., Cheng, J.-F., Wagner, G. P. & Amemiya, C. T. An  
473 independent genome duplication inferred from Hox paralogs in the American  
474 paddlefish—a representative basal ray-finned fish and important comparative  
475 reference. *Genome biology and evolution* **4**, 937-953 (2012).

476 38 Montavon, T. *et al.* A regulatory archipelago controls Hox genes transcription in  
477 digits. *Cell* **147**, 1132-1145, doi:10.1016/j.cell.2011.10.023 (2011).

478 39 Beccari, L. *et al.* A role for HOX13 proteins in the regulatory switch between  
479 TADs at the HoxD locus. *Genes Dev* **30**, 1172-1186, doi:10.1101/gad.281055.116  
480 (2016).

481 40 Woltering, J. M., Noordermeer, D., Leleu, M. & Duboule, D. Conservation and  
482 divergence of regulatory strategies at Hox Loci and the origin of tetrapod digits.  
483 *PLoS Biol* **12**, e1001773, doi:10.1371/journal.pbio.1001773 (2014).

484 41 Braasch, I. *et al.* The spotted gar genome illuminates vertebrate evolution and  
485 facilitates human-teleost comparisons. *Nat Genet* **48**, 427-437,  
486 doi:10.1038/ng.3526 (2016).

487 42 Schartl, M. *et al.* The genome of the platyfish, *Xiphophorus maculatus*, provides  
488 insights into evolutionary adaptation and several complex traits. *Nature genetics*  
489 **45**, 567 (2013).

490 43 Roux, J., Liu, J. & Robinson-Rechavi, M. Selective constraints on coding  
491 sequences of nervous system genes are a major determinant of duplicate gene  
492 retention in vertebrates. *Molecular biology and evolution* **34**, 2773-2791 (2017).

493 44 Bayés, A. *et al.* Evolution of complexity in the zebrafish synapse proteome.  
494 *Nature communications* **8**, 14613 (2017).

495

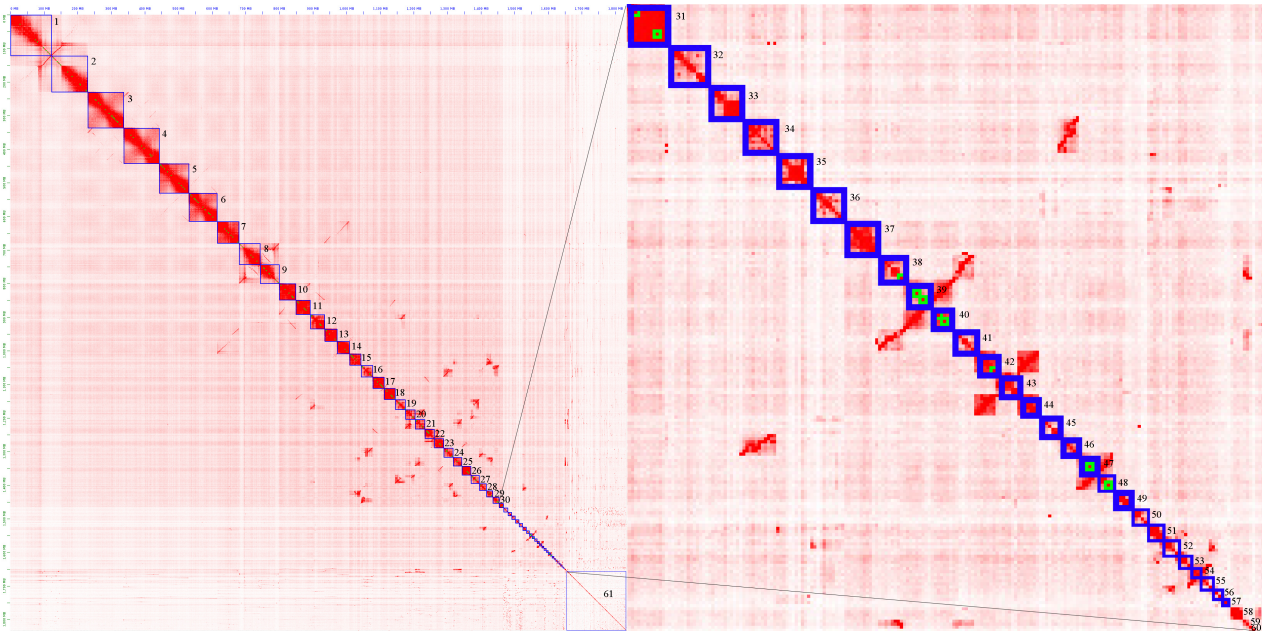

**Supplementary Fig. 1. Heatmap of interactions within and among chromosomes according to Hi-C analysis.** Chromosomes size scaffolds are indicated by the blue frames and numbered according to size.

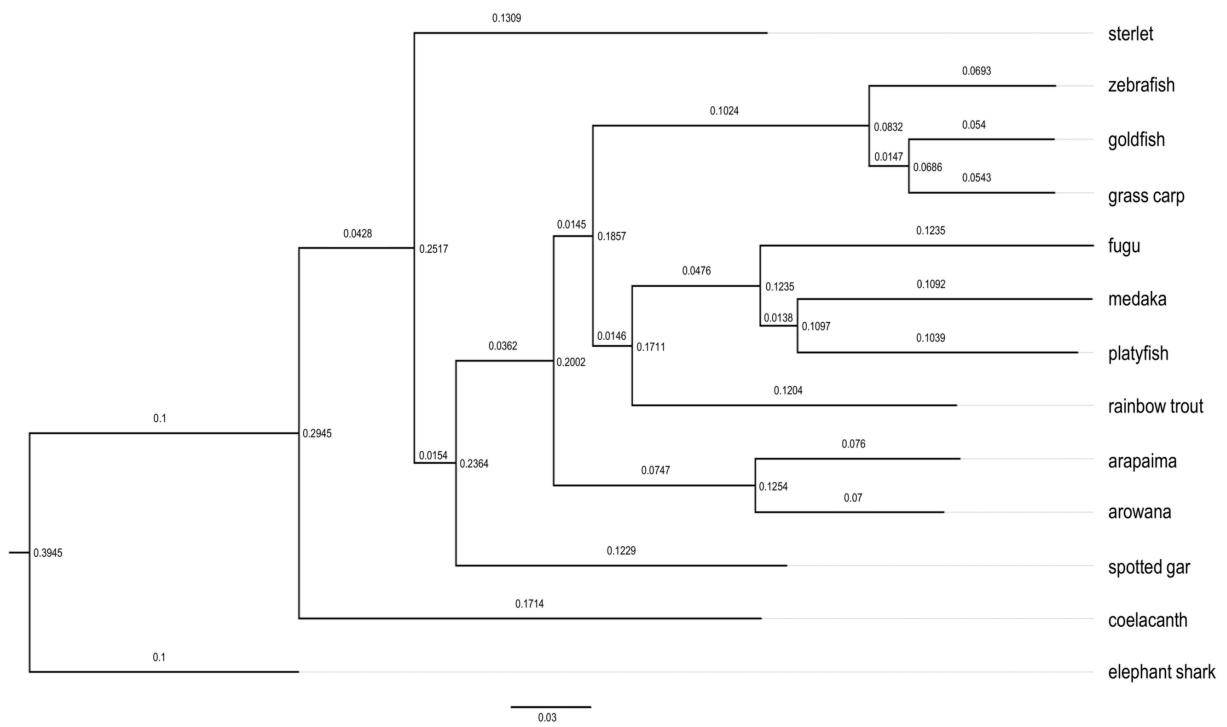

**Supplementary Fig. 2.** phylogenetic tree drawn by the interactive Tree Of Life tool (iTOL, <https://itol.embl.de/>) with default settings based on all homologes resulting from comparison2 (positive selection analysis). Numbers on the branch indicate branch length. Bar represents 0.03 substitutions per site.

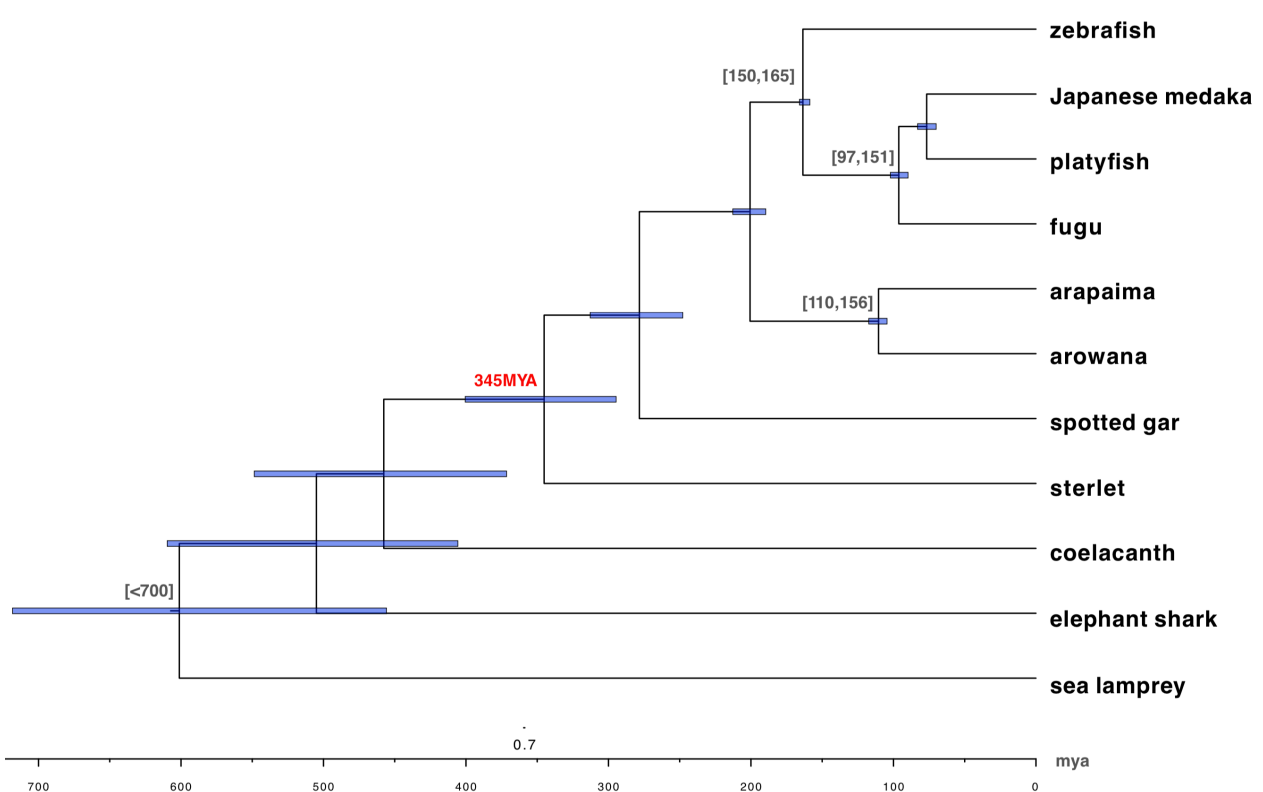

**Supplementary Fig. 3. Divergence time of sterlet.** The timescale was calculated from a phylogenetic tree based on 275 one-to-one orthologs using MCMCtree. Branch lengths were calibrated by using the fossil records for the split of medaka/fugu, zebrafish/stickleback, arapaima/arowana and sea lamprey. Numbers in black brackets indicate MYA of the fossil calibrations. Blue bars refer to the 95% confidence interval. Red numbers indicates the estimated time of sterlet divergence 345 MYA (295 - 400, 95% confidence level).

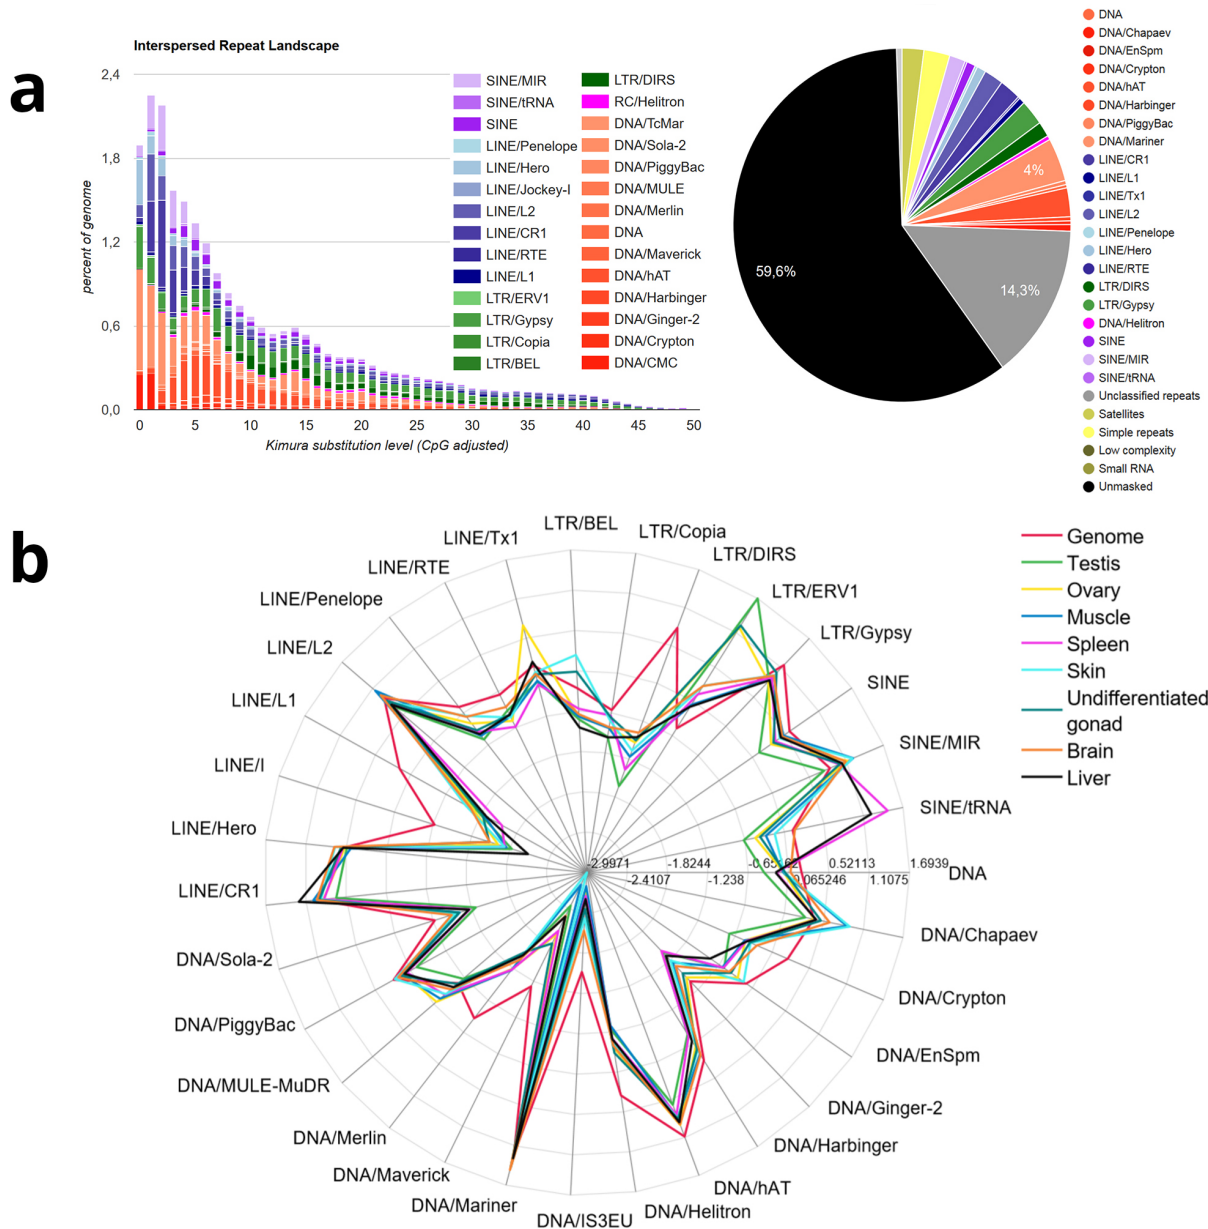

**Supplementary Fig. 4. Evolutionary history and expression of TEs.** a) Copy-divergence analysis of TE classes in sterlet, based on Kimura 2 parameter distances. The percentages of TEs in genomes (y axis) are clustered based on their Kimura values (x axis; K values from 0 to 50; arbitrary values). Older copies are located on the right side of the graphs while recent copies are located on the left side. b) The proportion of TE superfamily representation in the genome and eight organ transcriptomes of sterlet. The proportion of each TE superfamily was initially calculated as (% of TE superfamily  $\hat{\sim}$  100) / total % of TEs in the genome or transcriptome, and then for the spider graph transformed to  $\log_{10}$  values. The expression of LTR/ERV1 elements in gonads and SINE/tRNA in liver and spleen might be the result of their activity rather than of general background expression because their relative fraction is notably higher in the transcriptome than in the genome.

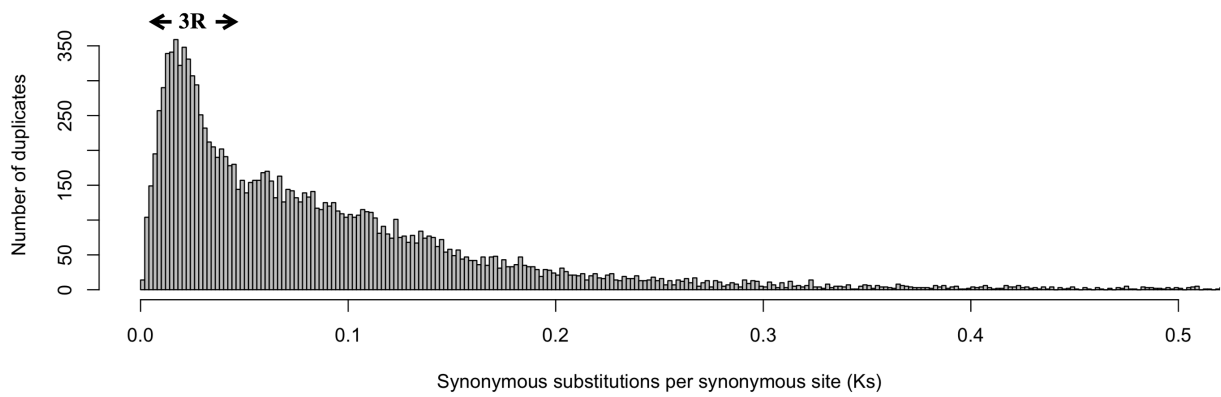

**Supplementary Fig. 5.** Age distribution of the sterlet paranome based on Ks values . The 3R event is obvious and indicated, while there is no visible signal from the 2R and 1R WGDs probably due to their very ancient occurrence.

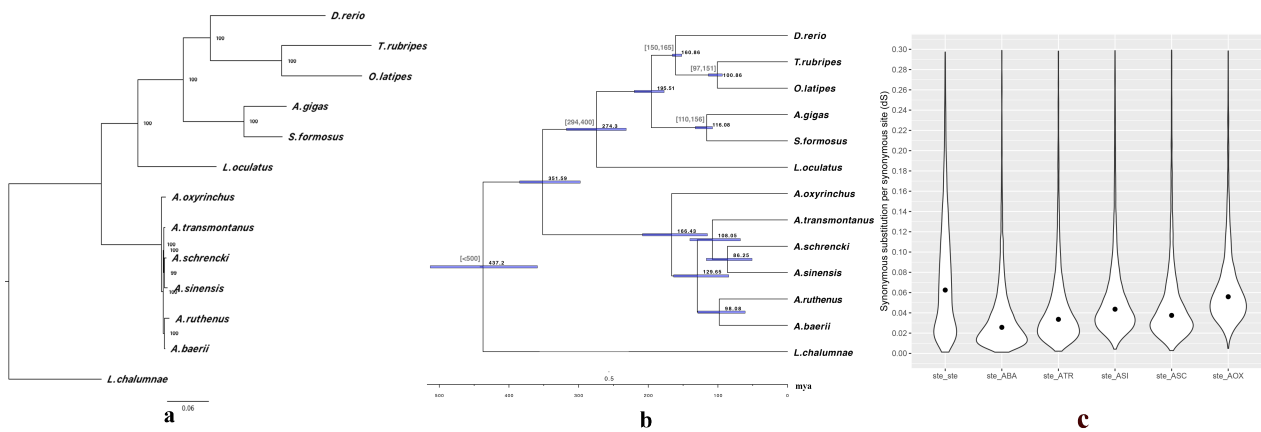

**Supplementary Fig. 6. Estimation of sterlet WGD age.** a) Phylogenetic tree showing the divergence of protein sequence among species b) Chronogram showing the divergence times of sturgeons and Teleosts with *L. chalumnae* as out group. Divergence time were calibrated by using the fossil records for the split of medaka/fugu, zebrafish/stickleback, arapaima/arrowana, and inferred time for gar/sterlet and coelacanth (the root). Numbers in black brackets indicate MYA of the calibrations. Blue bars refer to the 95% confidence interval. c) Violinplot comparing the distribution of pairwise dS among orthologous pairs between sterlet and *A. baerii* (ste\_ABA); sterlet and *A. transmontanus* (ste\_ATR); sterlet and *A. schrencki* (ste\_ASC); sterlet and *A. sinensis* (ste\_ASI); sterlet and *A. oxyrinchus* (ste\_AOX); and between sterlet ohnolog pairs (ste\_ste). Pairwise dS was calculated using codeml (PAML 4.9, runmodel=-2).



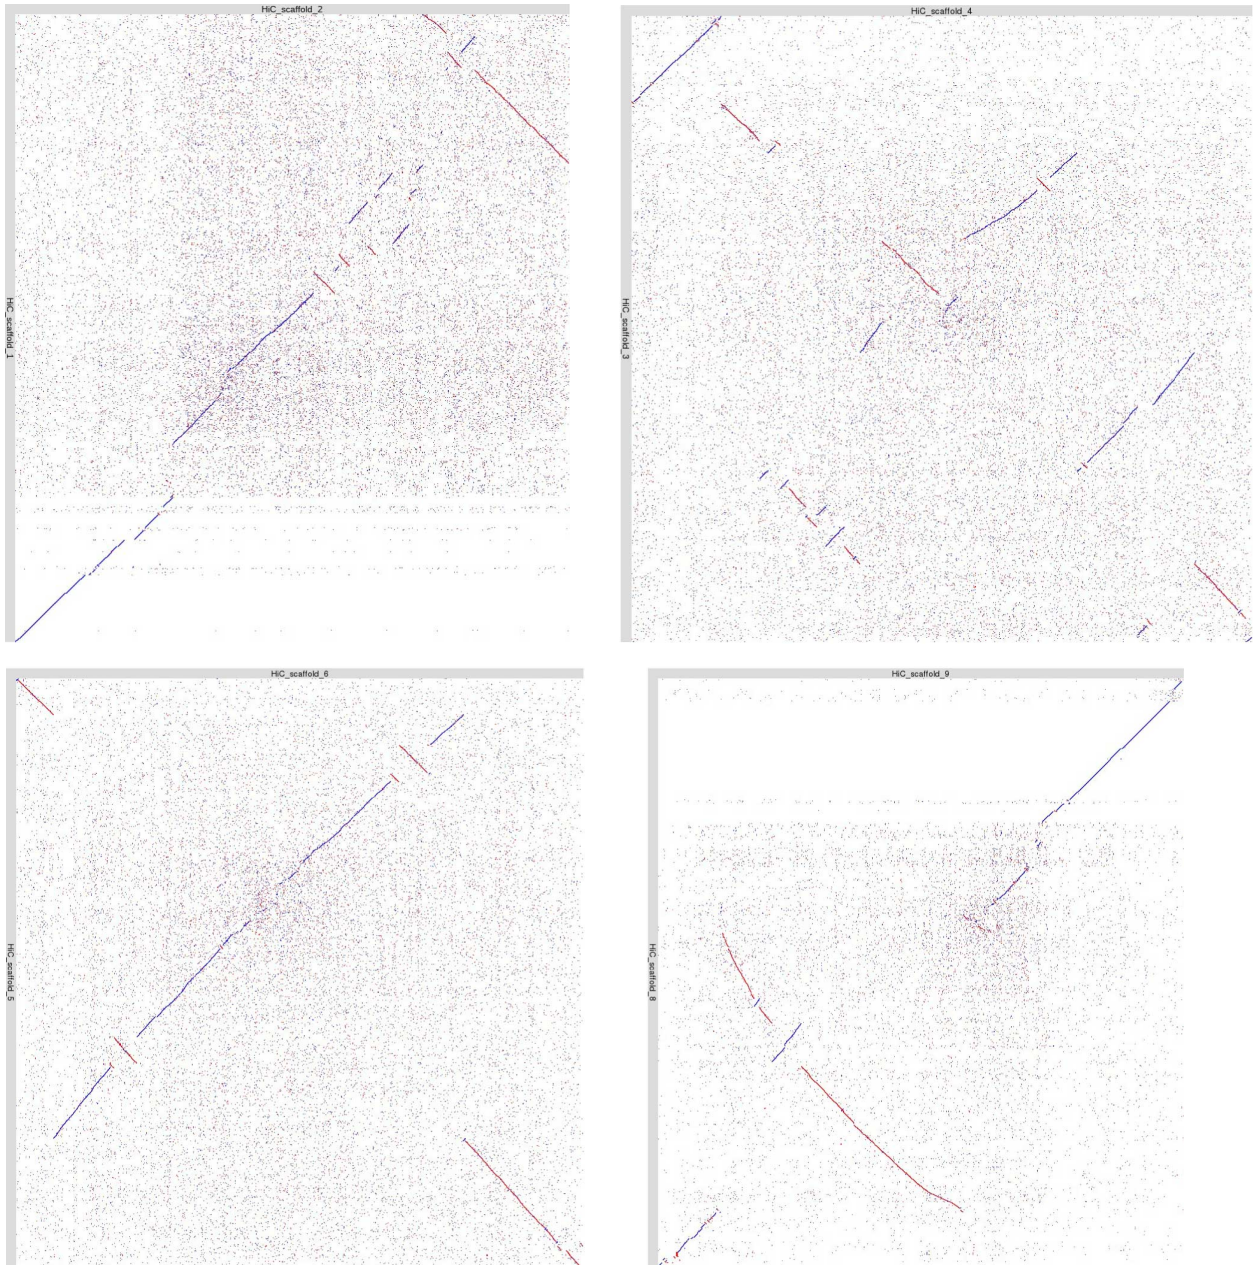

**Supplementary Fig. 7. Dotplots showing sequence alignments between sterlet chromosomes 1 and 2 (upper left), 3 and 4 (upper right), 5 and 6 (bottom left), 8 and 9 (bottom right).**

Corresponding chromosomes were aligned using LAST. Alignments with error probability  $> 10e-8$  were discarded. The long homologous regions imply gene synteny and conservation of the gene order.

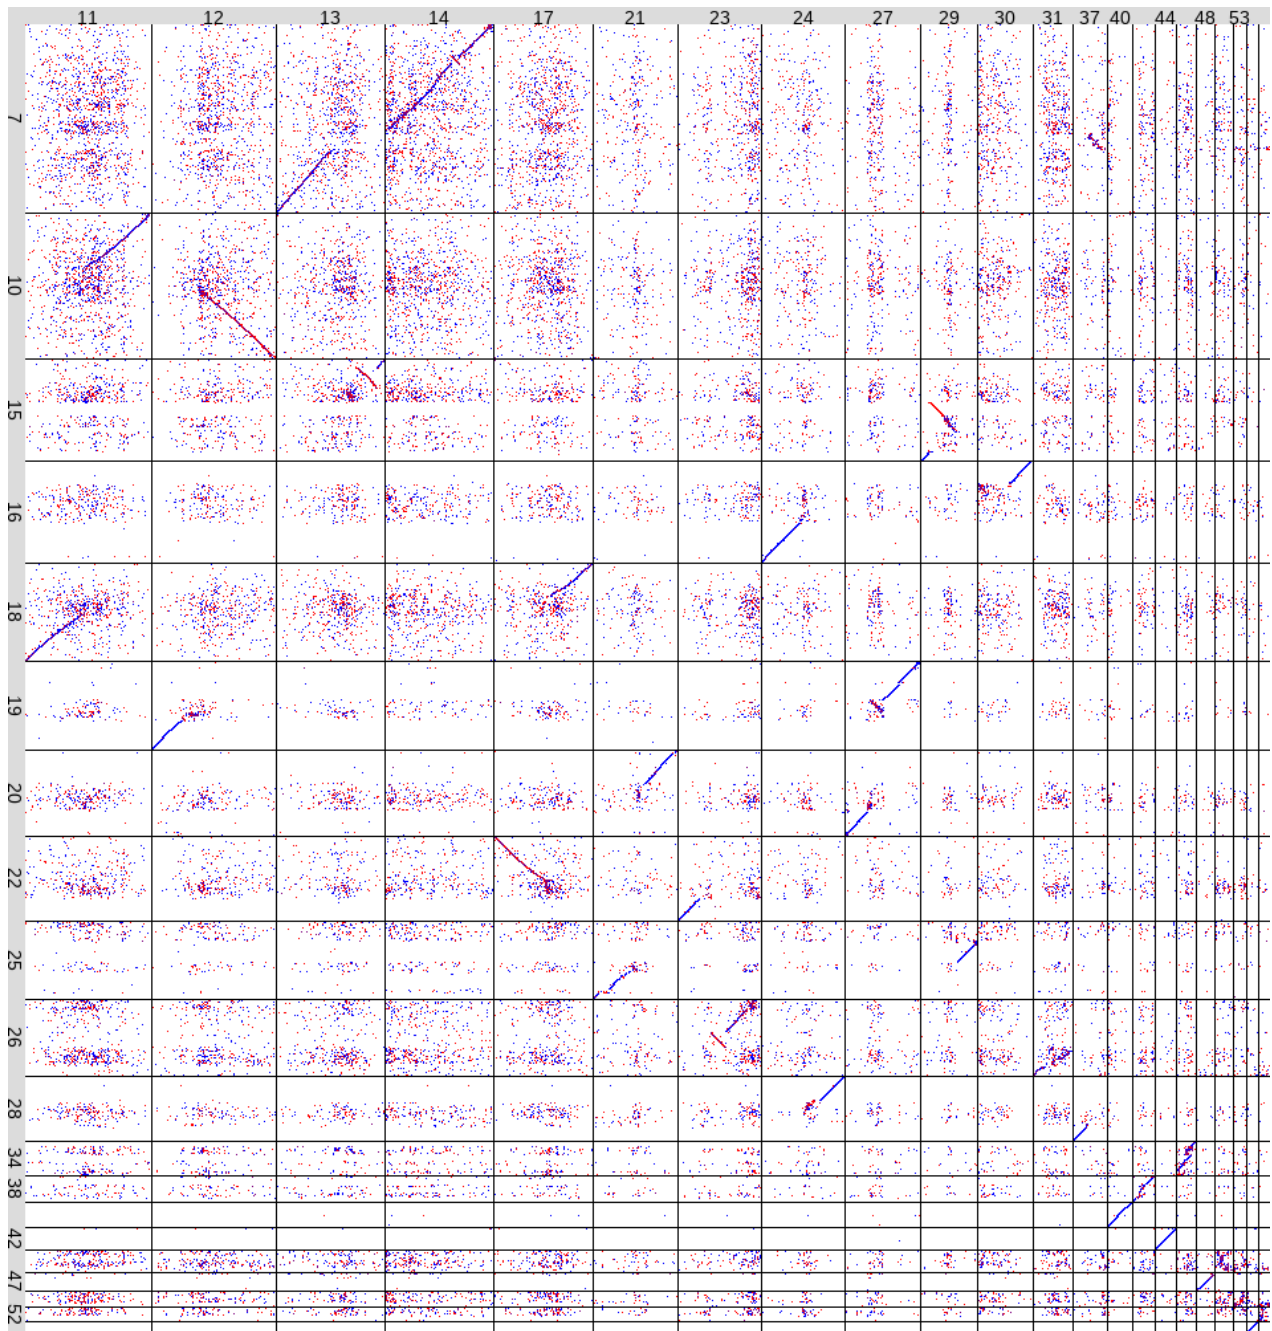

**Supplementary Fig. 8. Dotplots showing sequence alignments among sterlet chromosomes 7, 10-31, 34, 37-44, 46-49 and 51-56.** Corresponding chromosomes were aligned using LAST. Alignments with error probability  $> 10e-8$  were discarded. The long homologous regions imply gene synteny and conservation of the gene order.

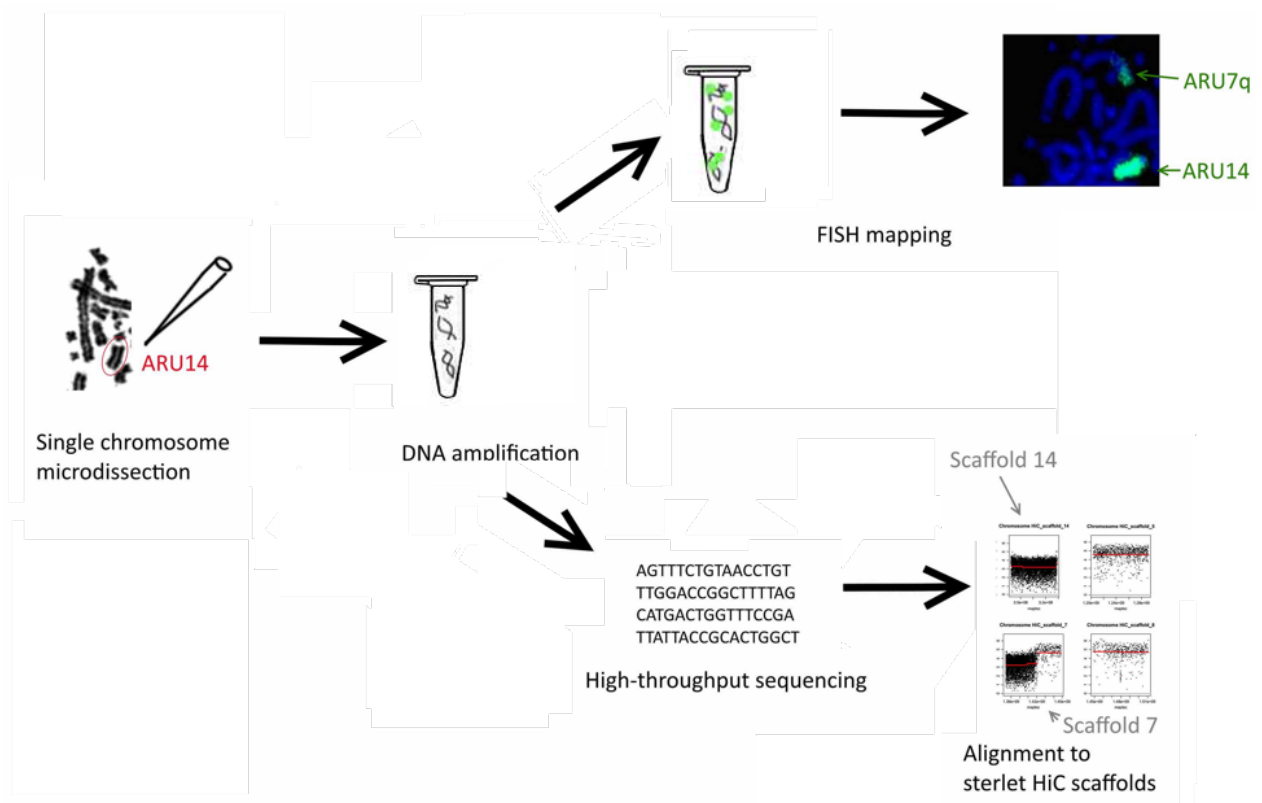

**Supplementary Fig. 9. Schematic drawing of the strategy for validation of genome assembly using single chromosome low-coverage sequencing.** Paralogous chromosomes are revealed both by FISH (i.e. ARU14 paints both ARU14 and ARU7q) and DOPSeq alignment to sterlet scaffolds (ARU14 library reveals strong signals on scaffolds 14 and 7q).

V1

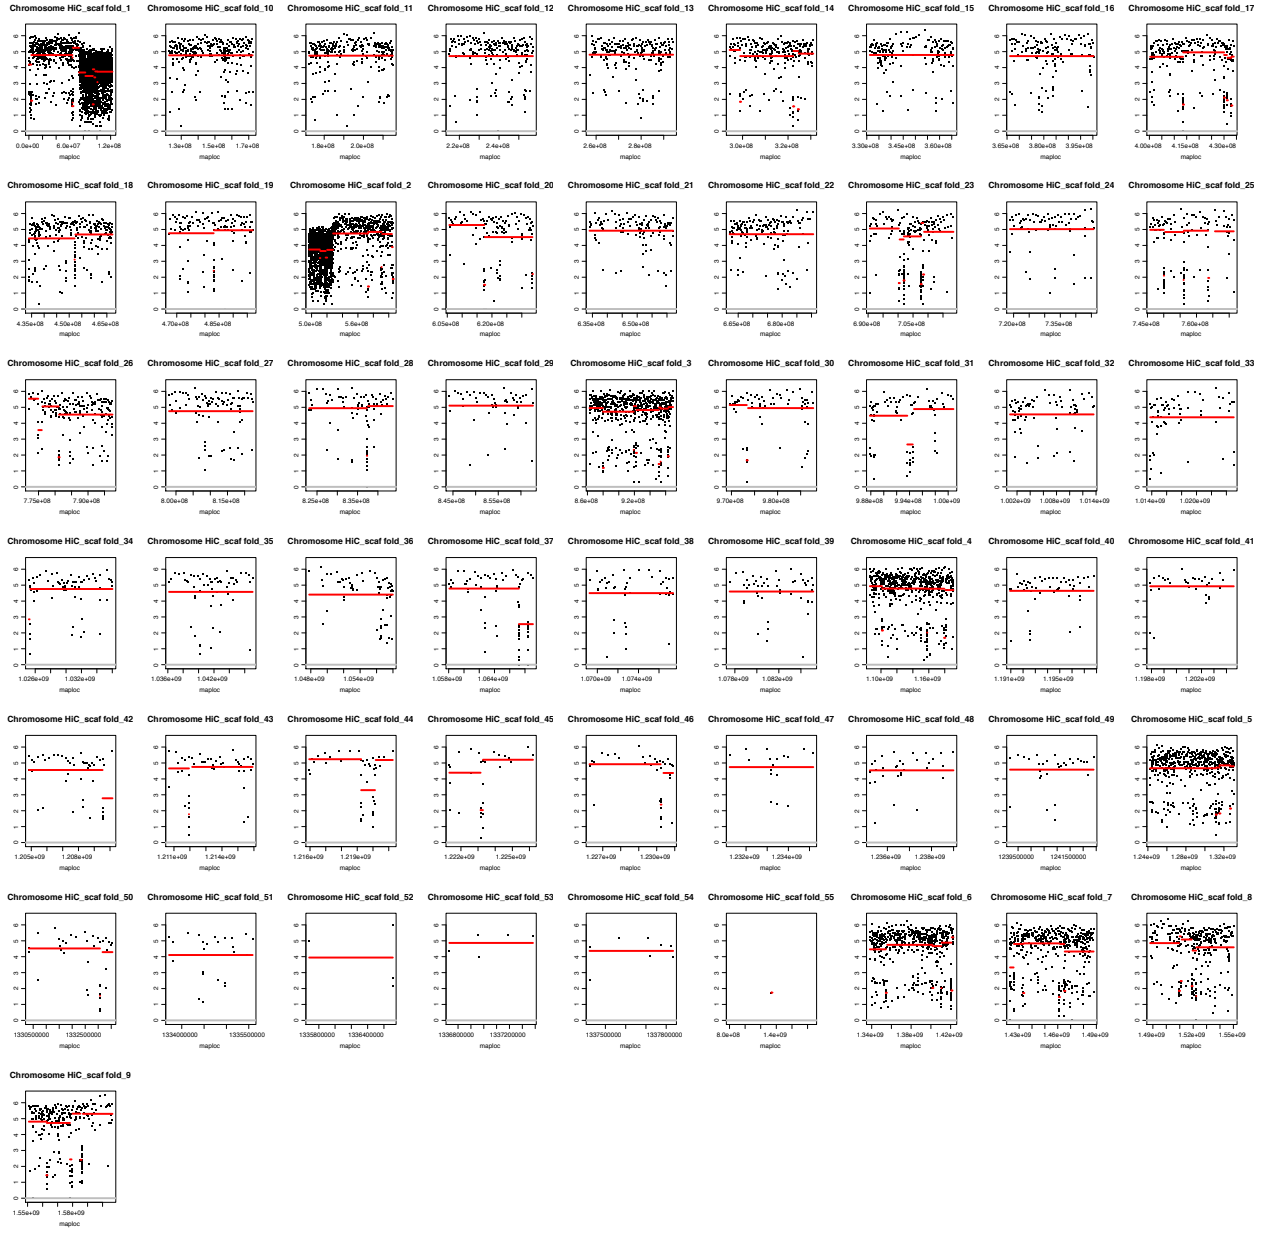

Supplementary Fig. 10. Mapping blots of Aru1p library on sterlet assemblies

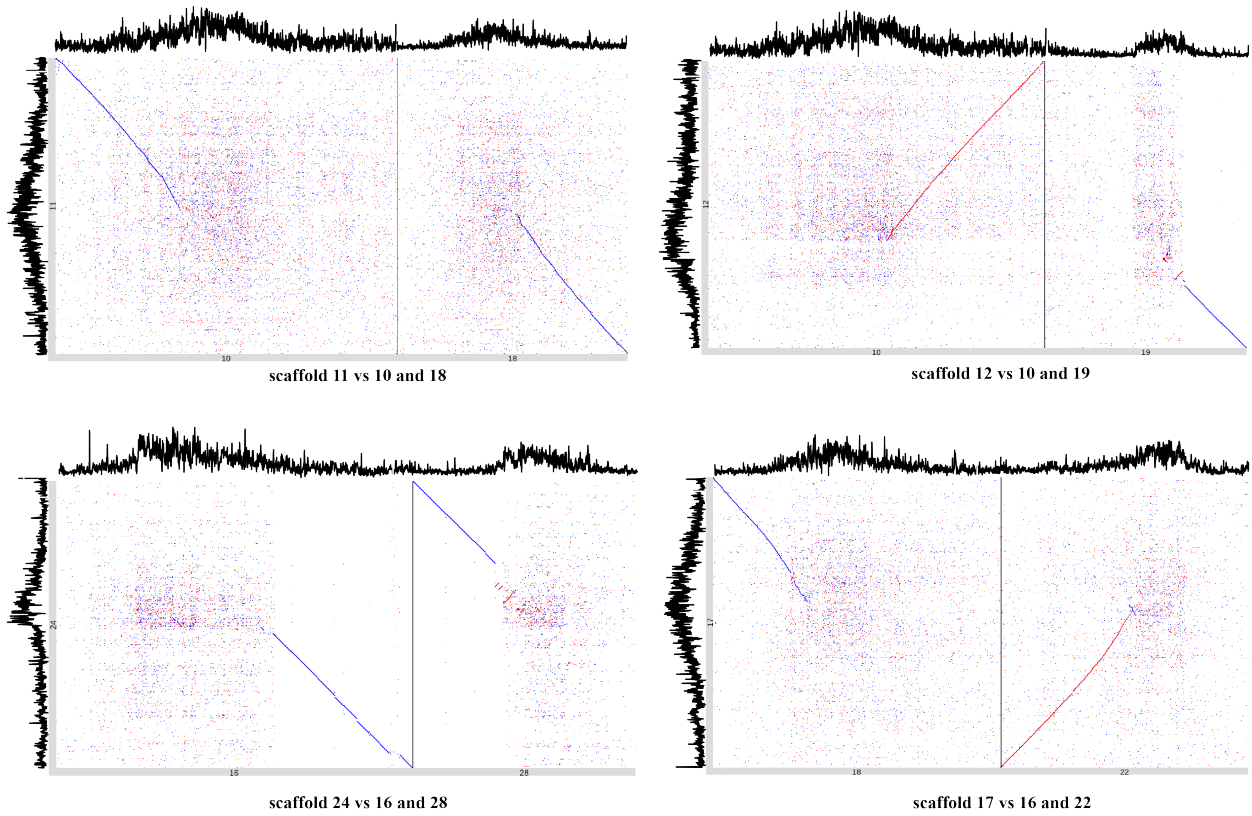

**Supplementary Fig. 11. Dotplot showing sequence alignments and line charts revealing the content of repeat elements.** Corresponding chromosomes were aligned using LAST. Alignments with error probability  $>10e-8$  were discarded. The line chart on the left and top of each dotplot represents the percentage of repeat elements of corresponding sequence regions (window size 30k).

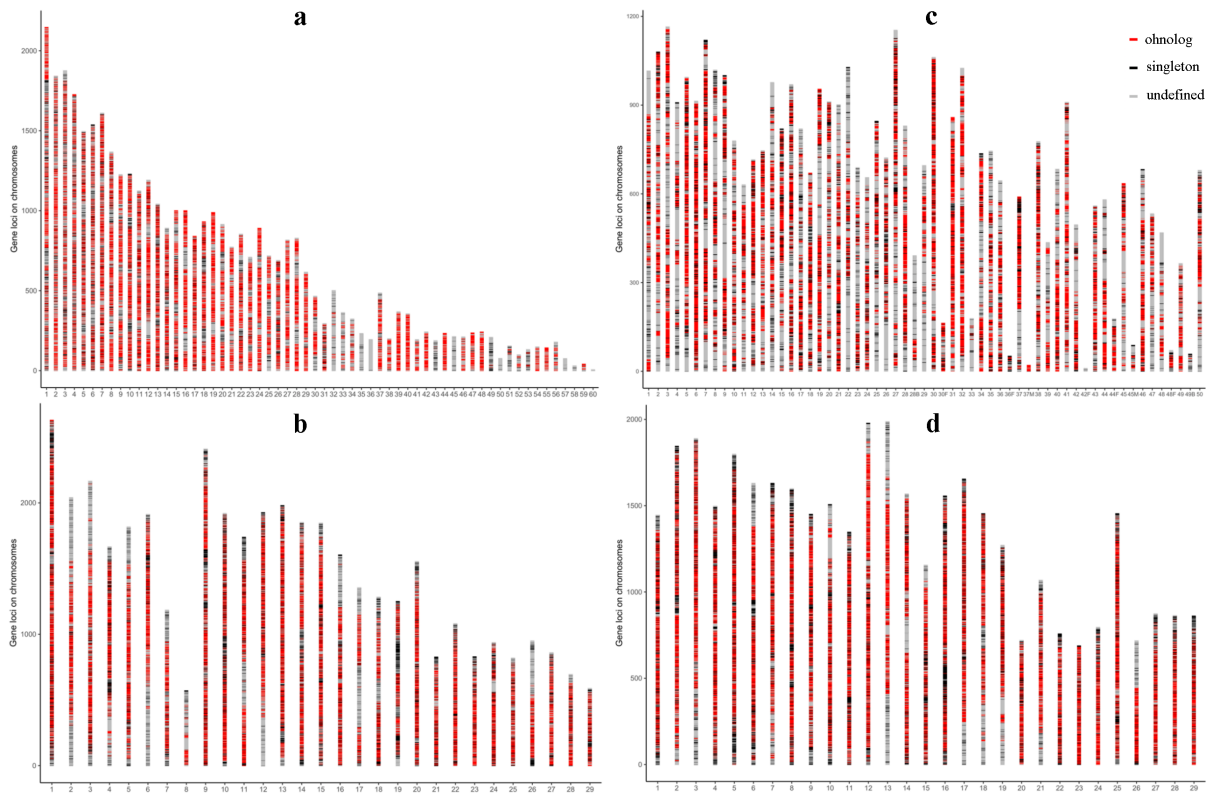

**Supplementary Fig. 12. Location of singletons and ohnologs on chromosomes of sterlet (a), goldfish (b), Atlantic salmon (c) and rainbow trout (d). Red bars represent ohnologs, black are singletons and grey is for undefined.**

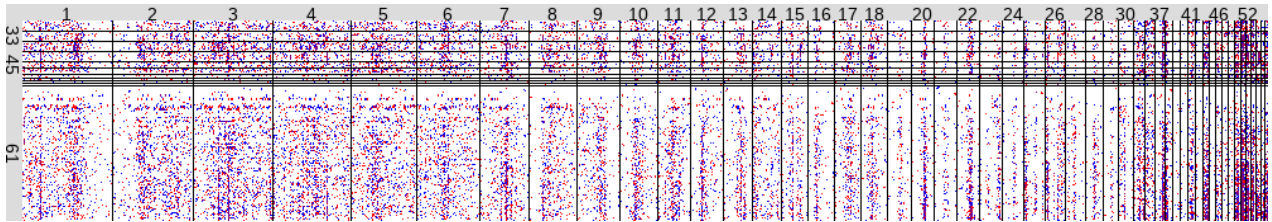

**Supplementary Fig. 13. Dotplot showing sequence alignments of sterlet chromosomes 32, 33, 35, 36, 45, 50, 57-60 and unassigned (scaffold 61) to the rest of genome.** Corresponding chromosomes were aligned using LAST. Alignments with error probability  $> 10e-8$  were discarded. The plot reveals no linear alignment of sterlet chromosome 32-35, 37-55 and U to the other chromosomes, indicating they have lost their homeologous counterparts during rediploidization.

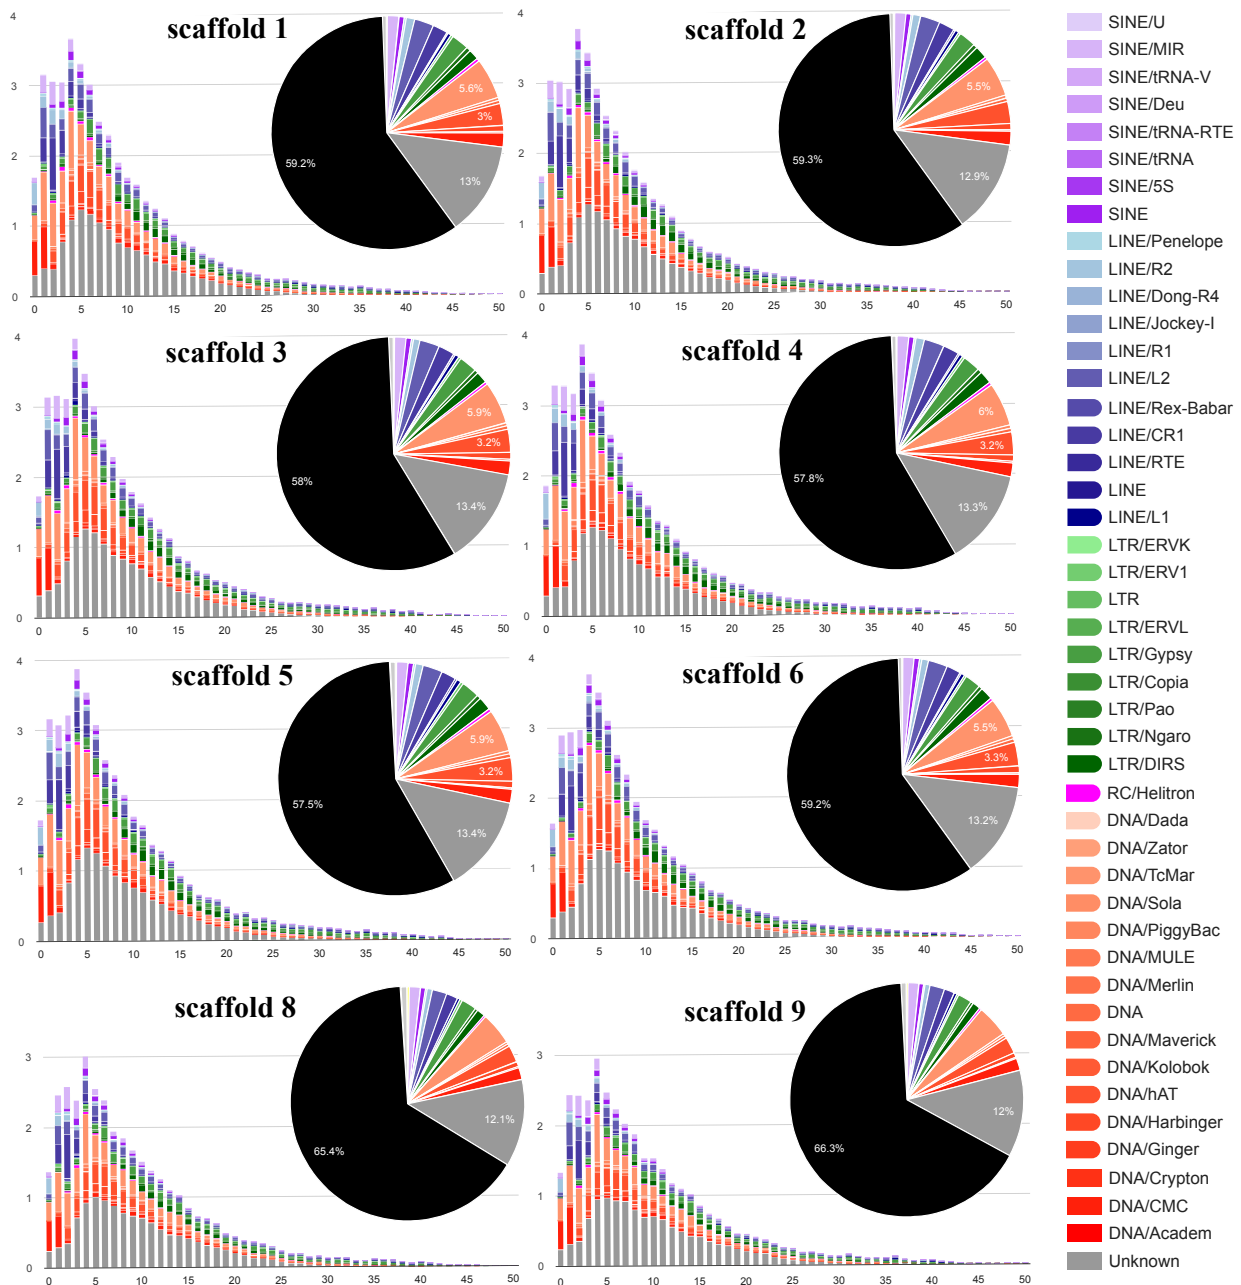

**Supplementary Fig. 14. Similarity of Kimura-landscape of repeat elements revealing autopolyploidy of sterlet.** Comparison of Kimura-landscape of repeat elements between the homeologous scaffold pairs 1-2, 3-4, 5-6 and 8-9. Percentages of repeats (Y-axis) are clustered based on their Kimura values (X-axis), which are arbitrary values calculated from nuclear divergence. Left side of X-axis represents recent copies while those on the right side are more ancient.



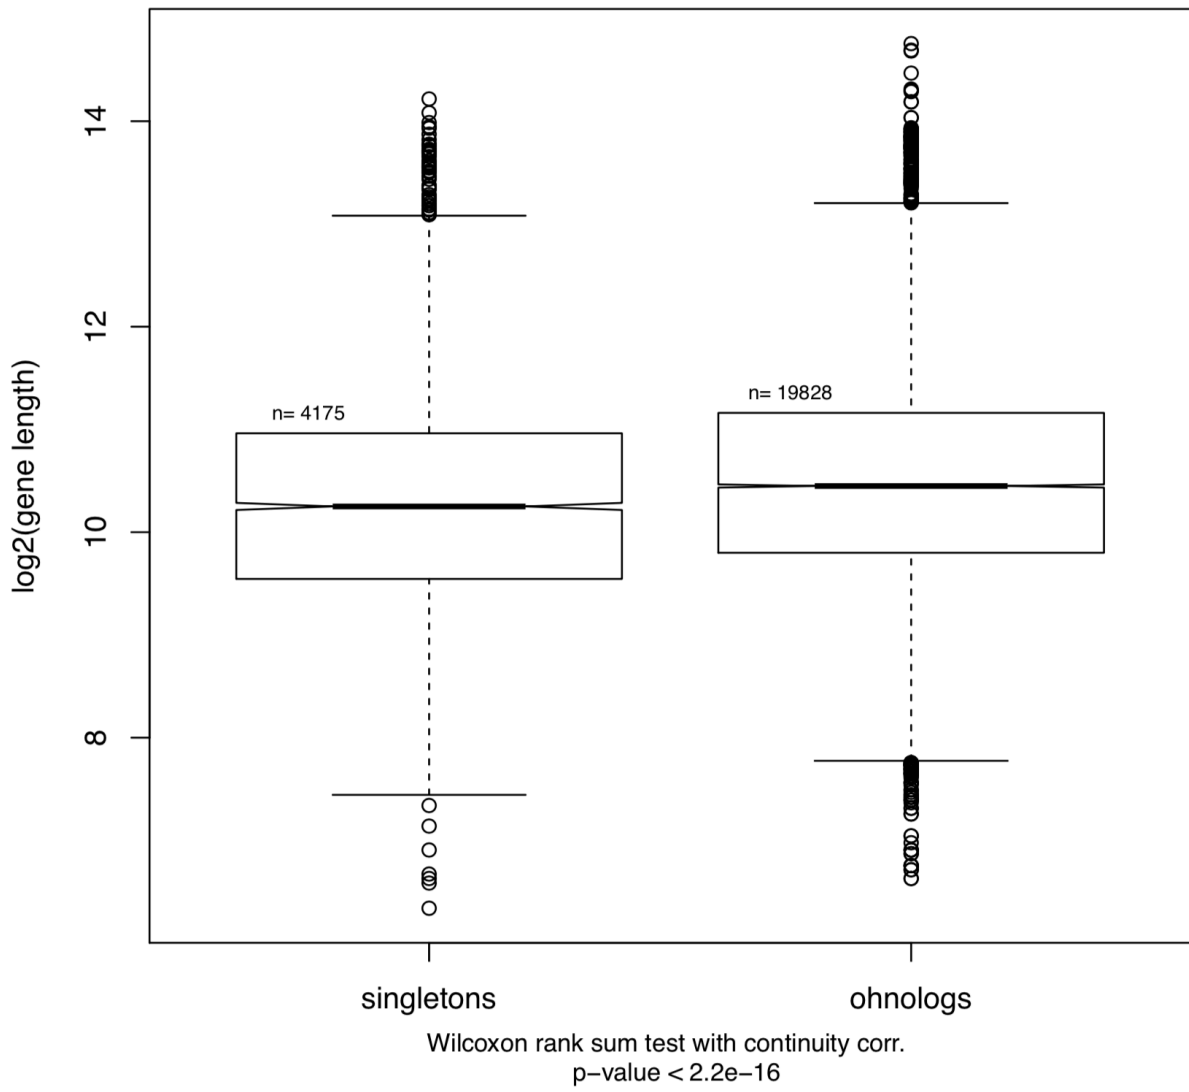

Supplementary Fig. 15. Boxplot of log<sub>2</sub>(gene lengths) for singletons and ohnologs.

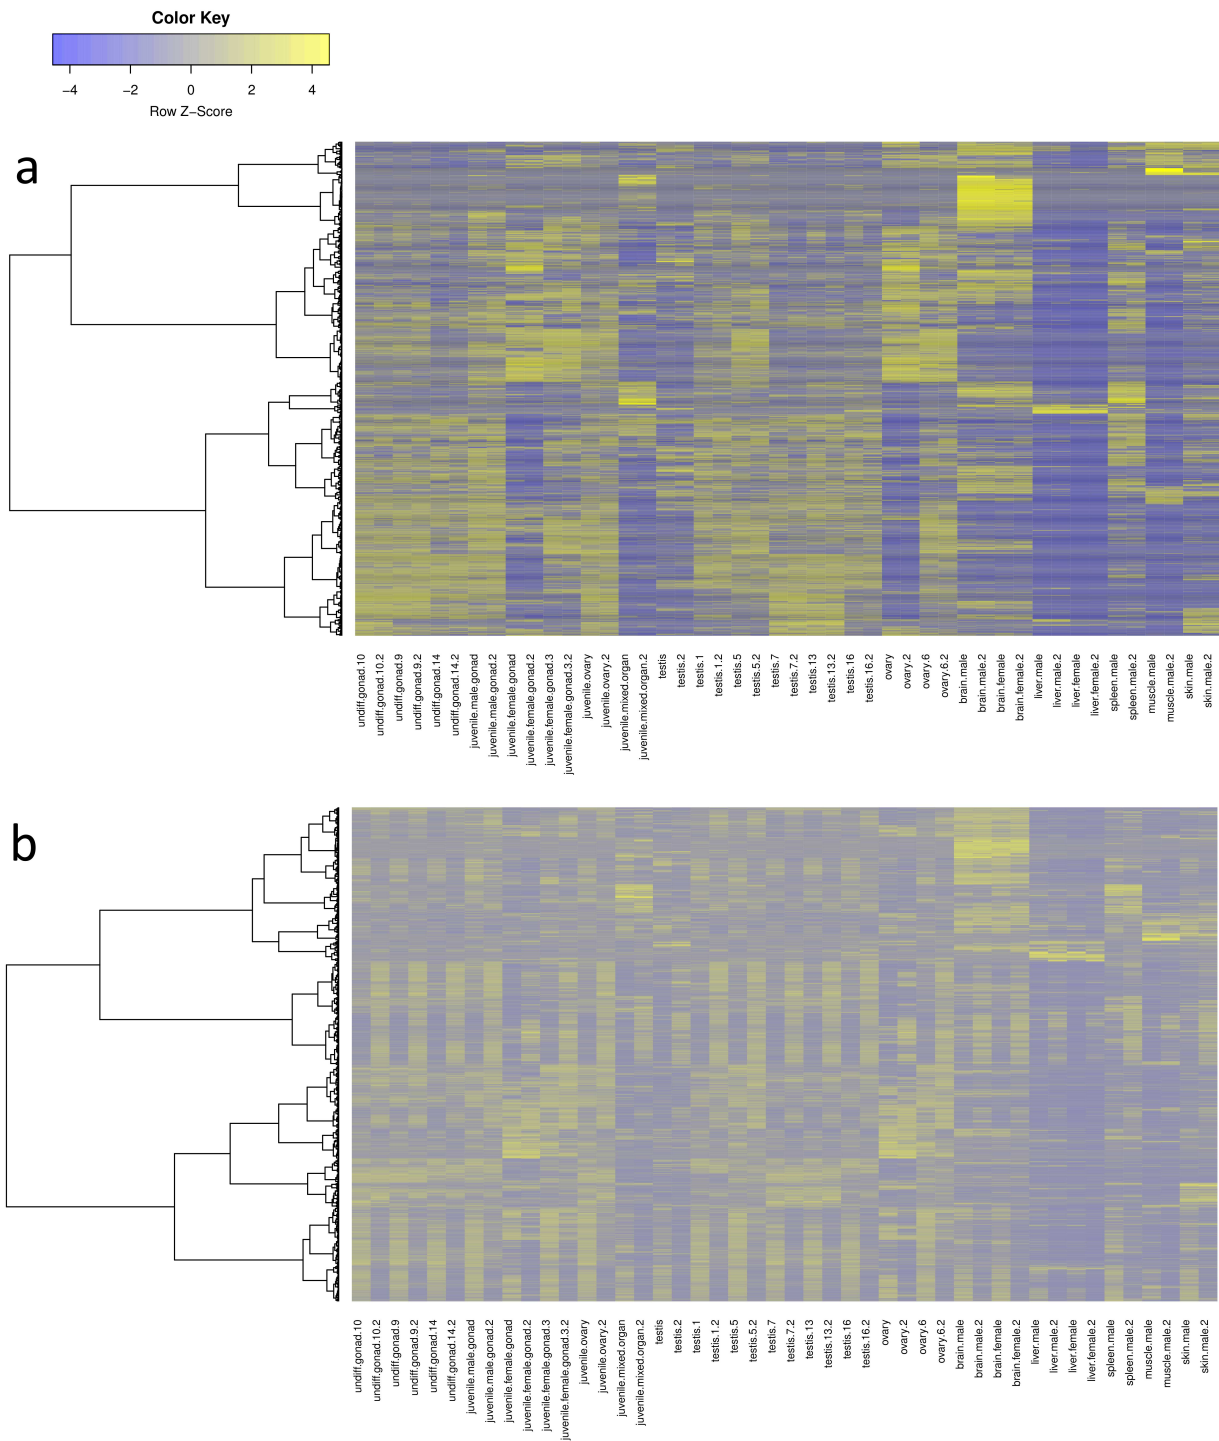

**Supplementary Fig. 16. Heatmaps of genes equally expressed (a) or differentially expressed (b) between ohnologs in at least two samples (b).** Only expressed ohnologs were considered (TPM>5 in at least one sample). Ohnologes were considered to be different expression levels, if the value for one onolog was at least twice the value for the second onolog in at least two samples. Heatmap color displays the z-score of  $\log_2\text{TPM}+1$  ranging from blue (low expression) to yellow (high expression). Columns represent individual samples, while rows represent genes. The values for both ohnologs are plotted in adjacent columns with '.2' denoting the gene values in the same sample for the second ohnolog.

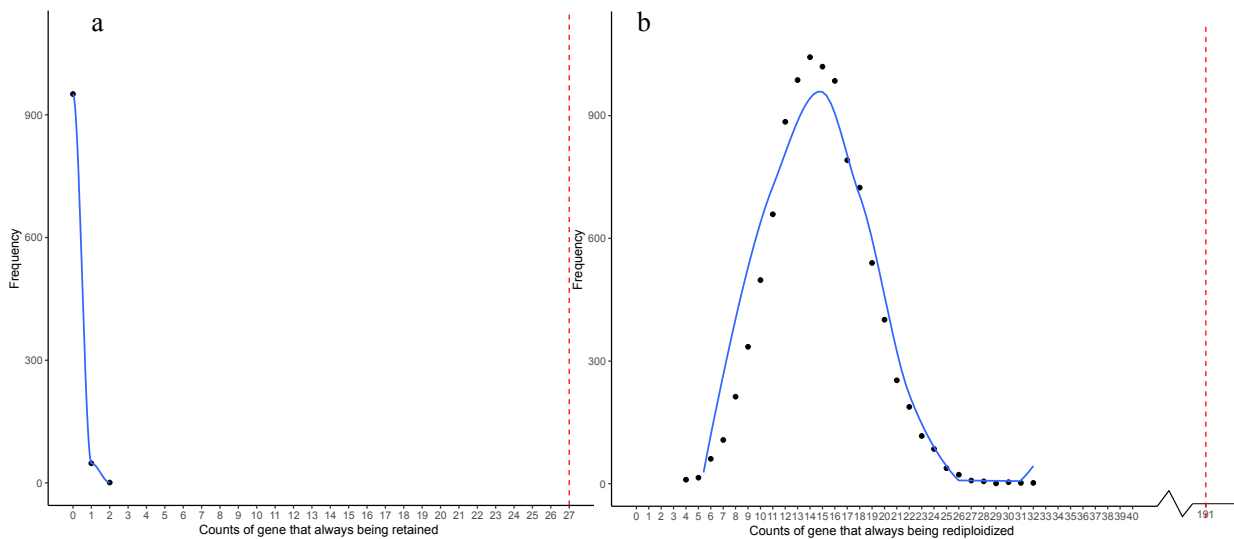

**Supplementary Fig. 17. Dotplot of expected number of genes that are always retained (a) or deduplicated (b) after WGDs under random retaining/deduplication process.** Starting from 15216 genes, we simulated a stochastic process by randomly retaining or deduplicating the ohnologs after each WGD in sterlet, arapaima, zebrafish, goldfish, medaka, Atlantic salmon and rainbow trout. For each of the 10,000 simulations, the genes that were always deduplicated or retained were counted. The dashed red vertical line indicates the count observed.

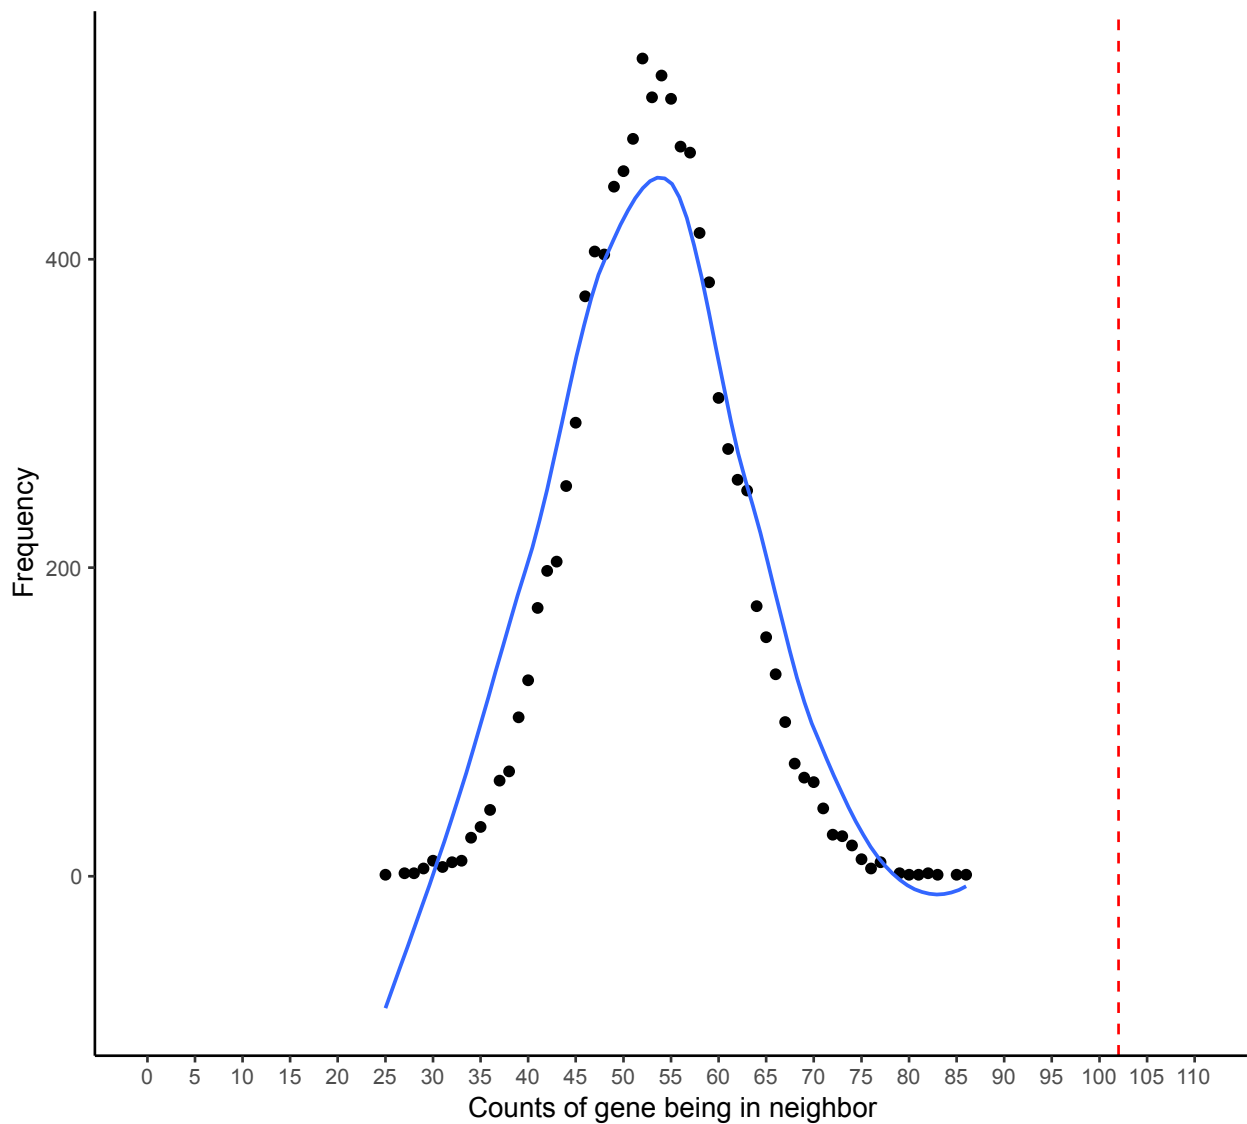

**Supplementary Fig. 18. Dotplot of expected gene counts for close linkage under a random rediploidization process.** From 15216 gar genes, we randomly resampled, with no return, 191 genes (the number of observed genes always being deduplicated after WGDs) to count the genes neighbouring each other (with in between not more than 5 genes missing). We repeated the resampling for 10,000 times for the expectation distribution. The dashed red vertical line indicates the count observed.

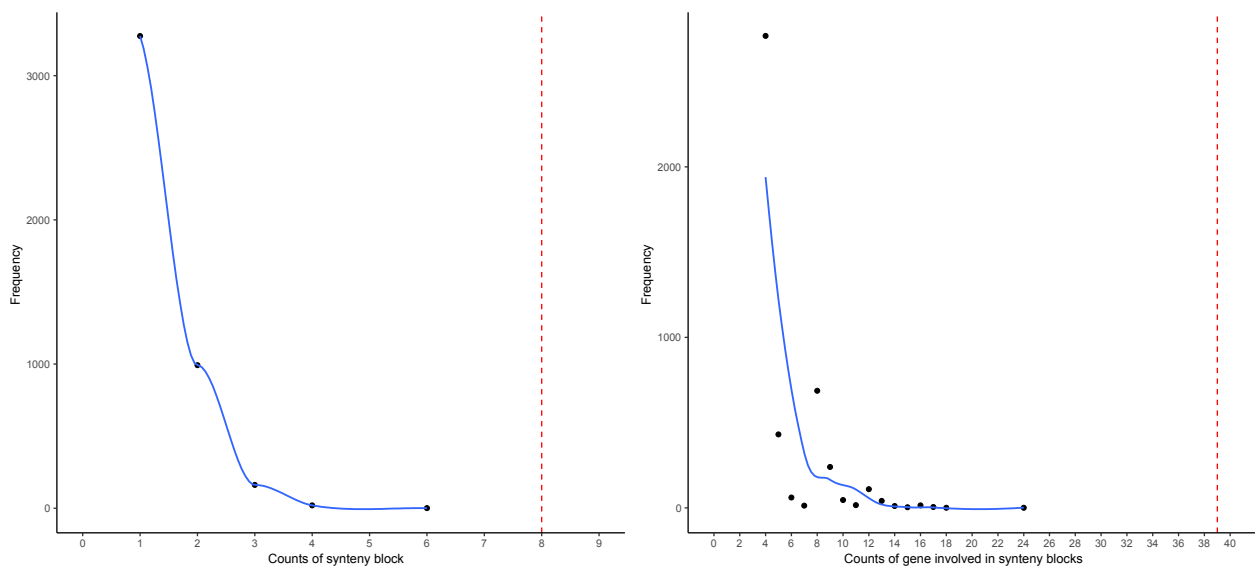

**Supplementary Fig. 19. Dotplot of expected syntenic block counts and number of genes involved under random rediploidization process.** From 15216 gar genes, we randomly resampled, with no return, 191 genes (the number of observed genes always being deduplicated after WGDs) to count the syntenic blocks (containing five genes at least, with gap <15) and the number of genes in blocks. We repeated the resampling for 10,000 times for the expectation distributions. The dashed red vertical lines indicates the count observed.

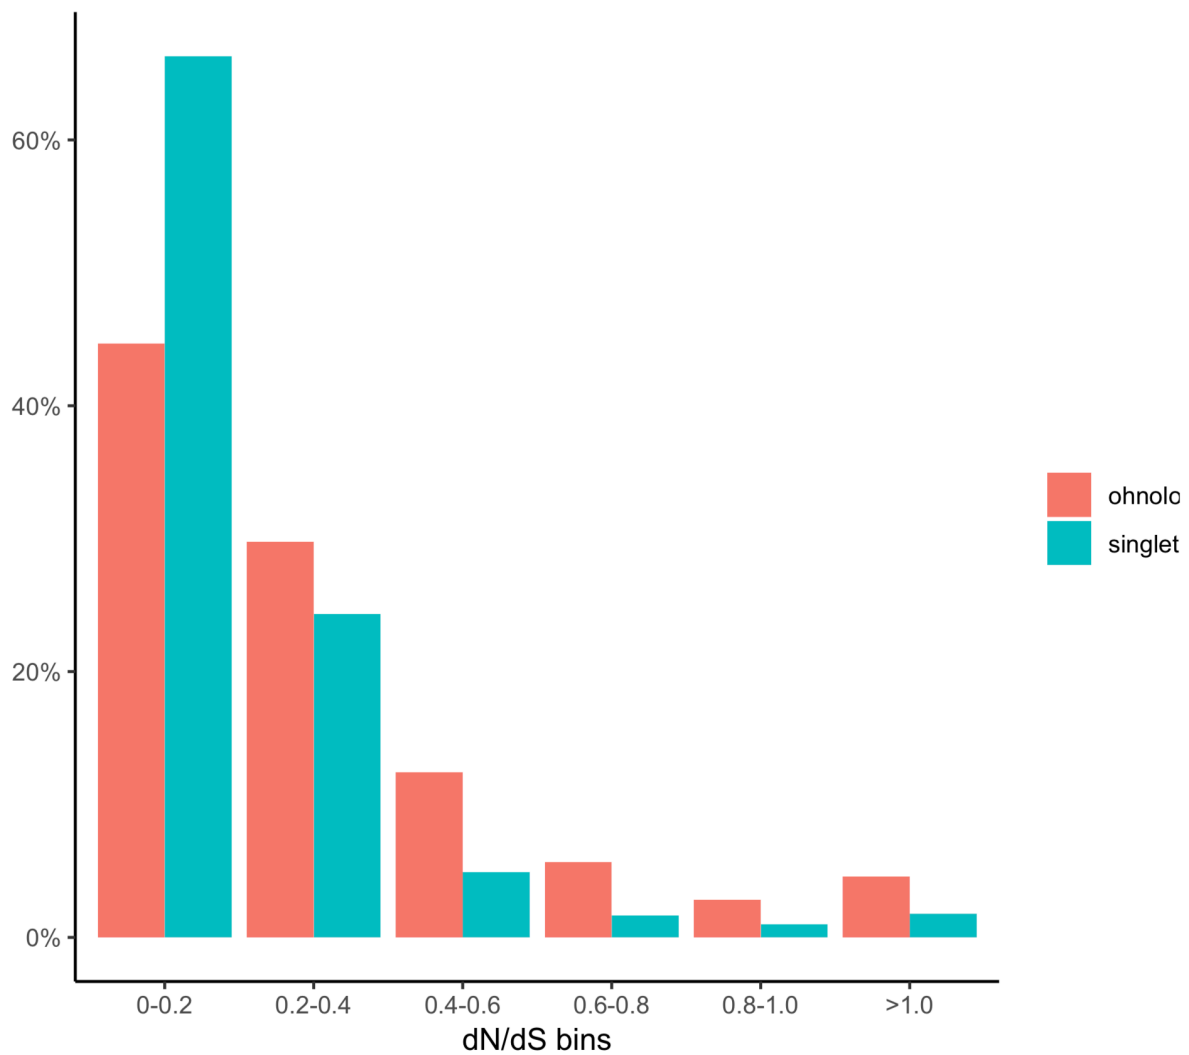

**Supplementary Fig. 20. Distribution of omega (dN/dS) values of ohnologs and singletons in *sterlet*.** While singletons have a higher fraction of genes with low omega values than ohnologs, ohnologs are enriched for genes with higher dN/dS values. Omega values were calculated using codeML (PAML4.9) under free-ratio model. For each *sterlet* singleton or pair of ohnologs their single-copy orthologies in other species were included to reconstruct the multiple alignment and gene tree (guided by species tree).

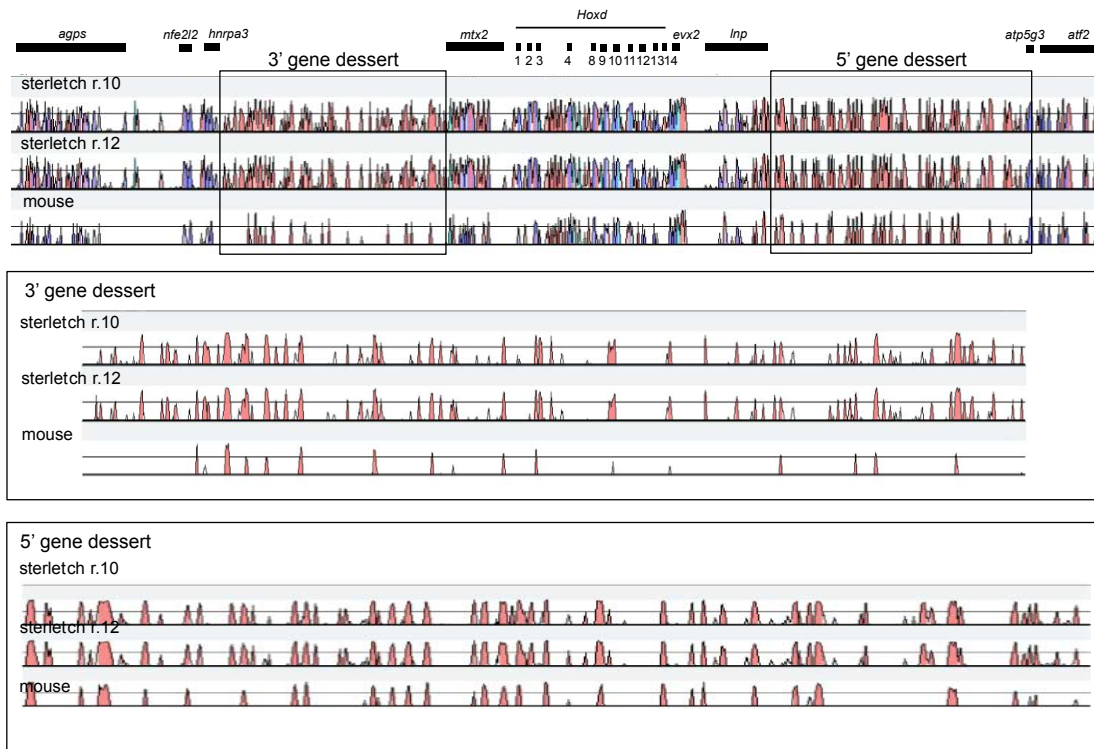

**Supplementary Fig. 21. Lagan VISTA plot for the *hoxd* cluster synteny region from *agps* to *atf2*.**

The spotted gar sequence was used as baseline, shown in comparison with the mouse and the two sterlet *Hoxd* clusters (from chromosome 10 and chromosome 12 respectively). The gnathostome *Hoxd* clusters are flanked on either end by gene deserts enriched for ultra conserved non-coding elements (UCNEs) (light red), which are involved in long-range gene regulation. The 3' gene desert is located between *hnrpa3* and *mtx2* and the 5' gene desert between *Inp* and *atp5g3*. The extent of both gene deserts is indicated on the synteny plot in the top panel. Separate enlargements for the 3' and 5' gene deserts are shown in the lower two panels. Both gene deserts are characterised by a large number of UCNEs. The conservation profile for each of the sterlet *Hoxd* clusters is very similar and all UCNEs shared with the spotted gar are present in both orthologous synteny regions.

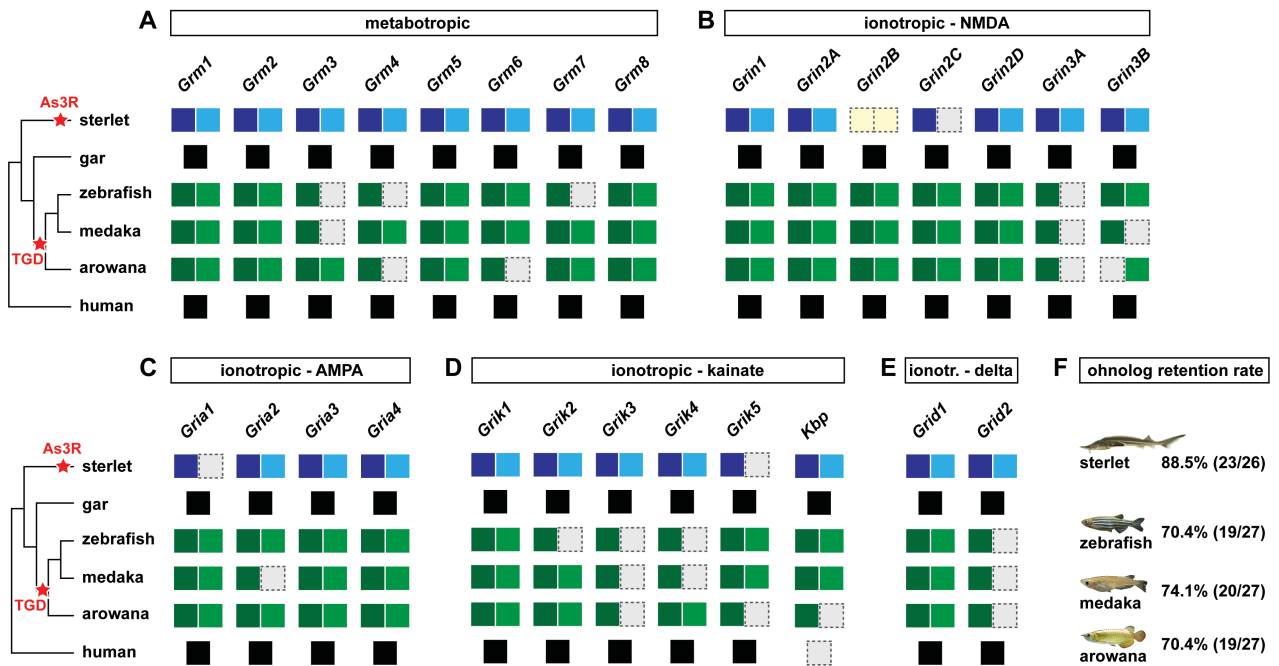

**Supplementary Fig. 22. GR gene repertoire in bony vertebrates. Genes are symbolized by filled squares.** Ohnologs from the As3R and TGD event are indicated by dark and light blue and green squares, respectively. Squares with dashed lines indicate gene losses.



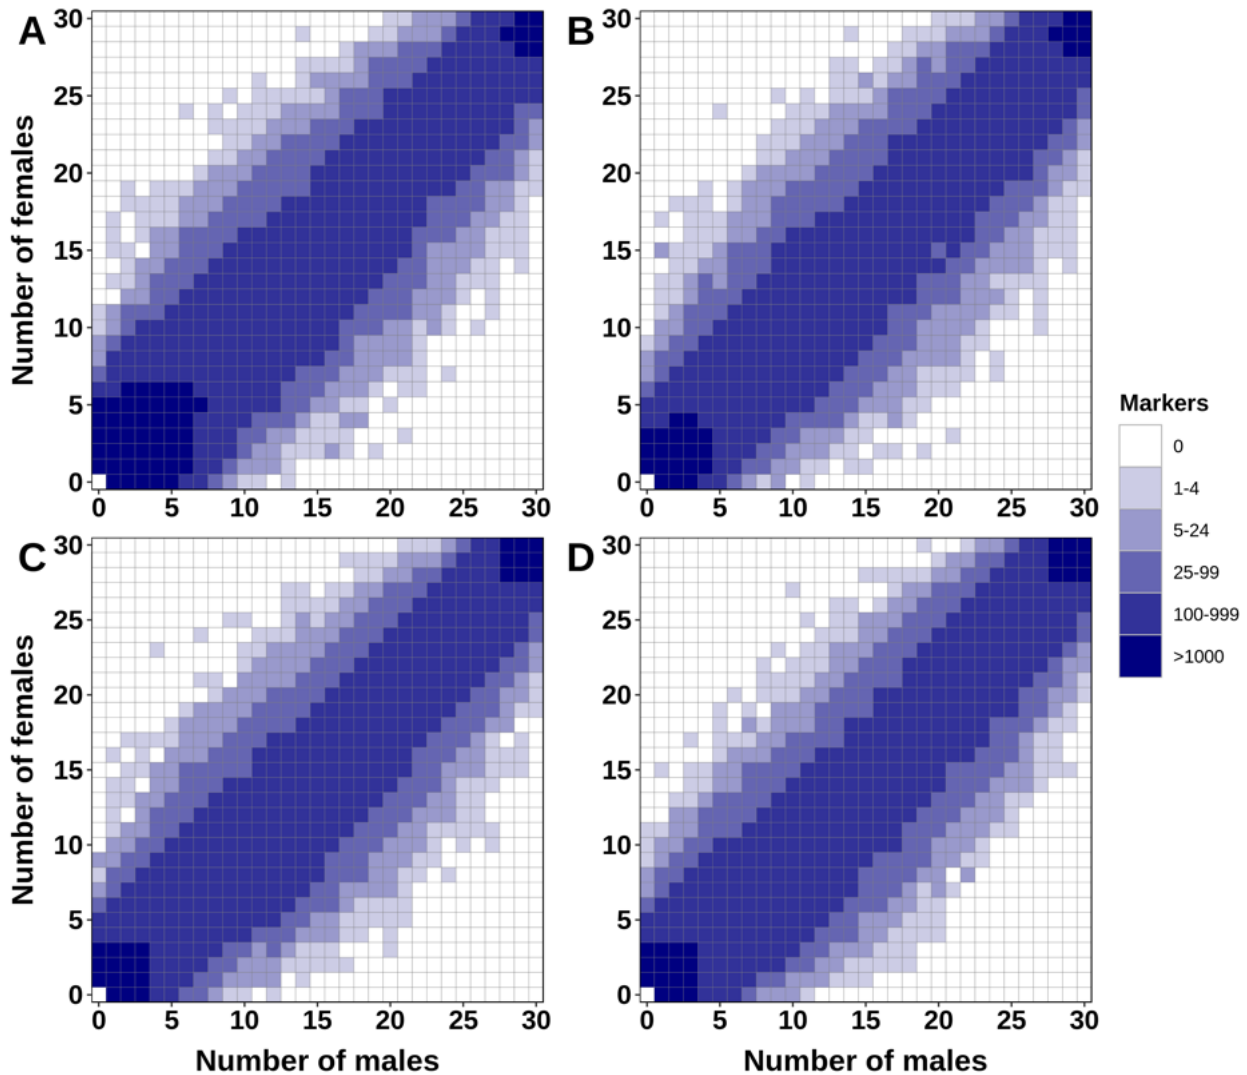

**Supplementary Fig. 23. distribution of RADSex markers in males and females for *A. ruthenus*.**

The distribution of markers in male and female individuals was computed with RADSex with a minimum depth to consider a marker present in an individual of 1 (A), 2 (B), 5 (C), and 10 (D). In each tile plot, the number of males and number of females are represented on the horizontal and vertical axes respectively, and the color of a tile indicates the number of markers present in the corresponding number of males and females. There was no marker associated with phenotypic sex (i.e. markers found in most individuals from one sex and absent from most individuals from the other sex) for any minimum depth value.

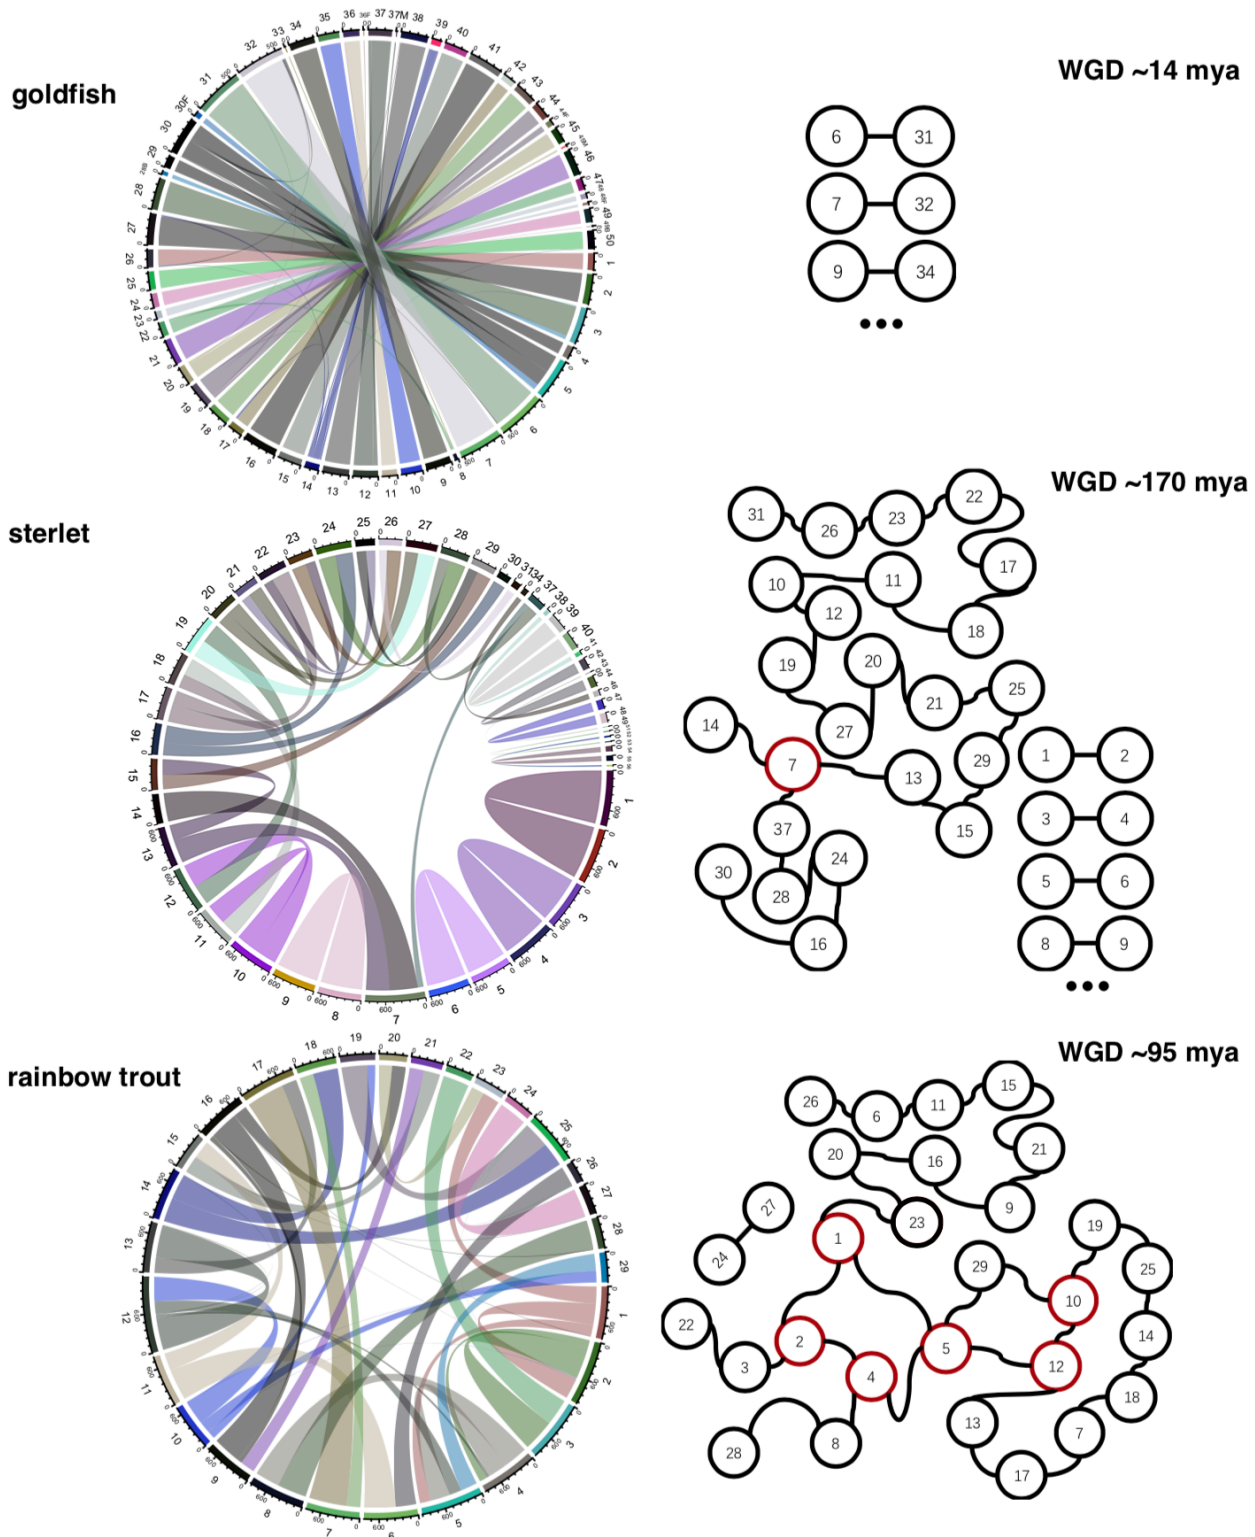

**Supplementary Fig. 24. Schematic diagram demonstrating the chromosome dynamics after WGD in goldfish, sterlet and rainbow trout.** Left, chord diagrams showing the pairwise homeology relations. Right, schematic representation of homeolog correspondence between whole chromosomes or chromosome arms. In goldfish, all chromosomes are homeologous over the whole length, in sterlet only four chromosome pairs show full correspondence, while in rainbow trout only one such pair is found. The arrangement in the chains is inferring the sequence of chromosome arm exchanges. Hubs are painted in red.

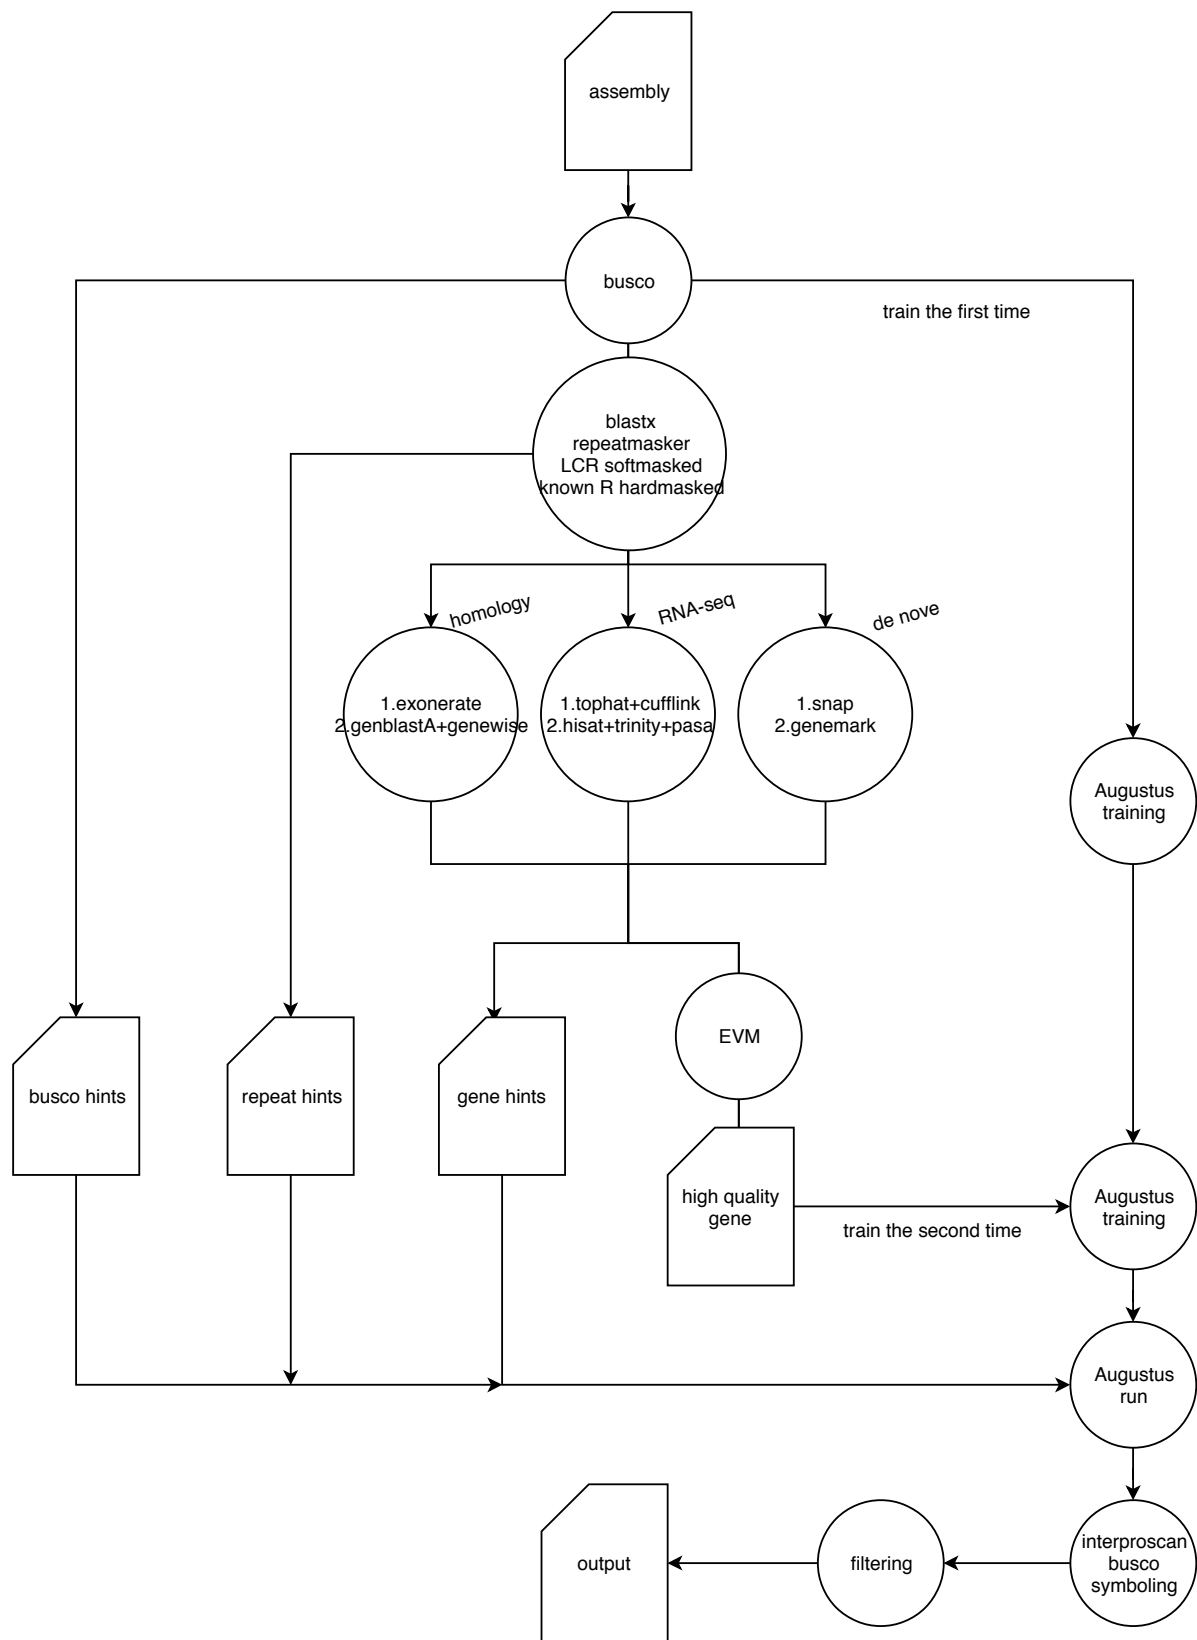

**Supplementary Fig. 25. Flowchart of the genome annotation process.** For explanation see Materials and methods section.

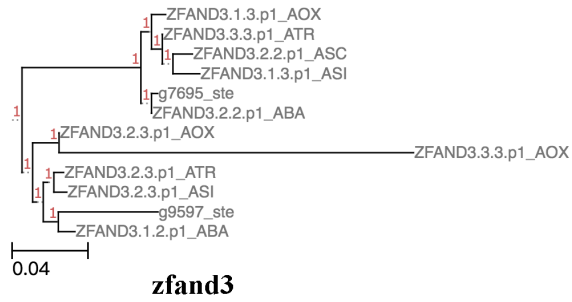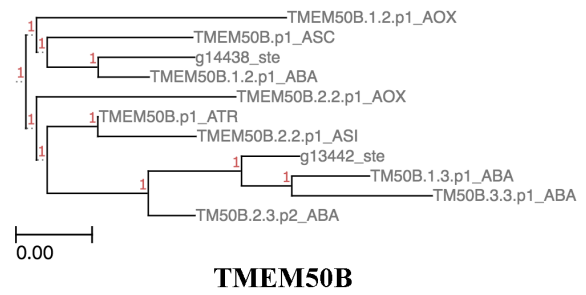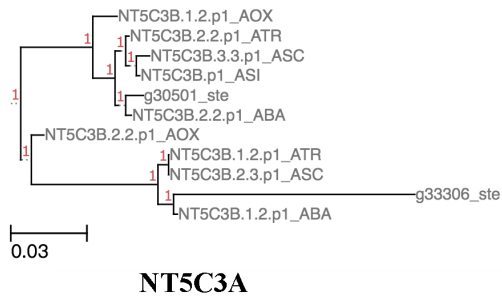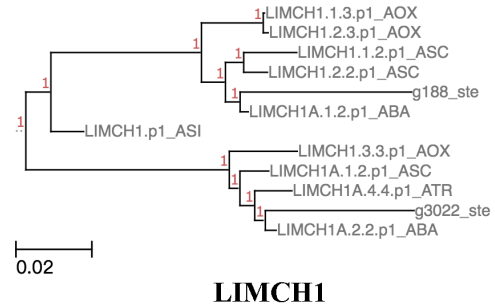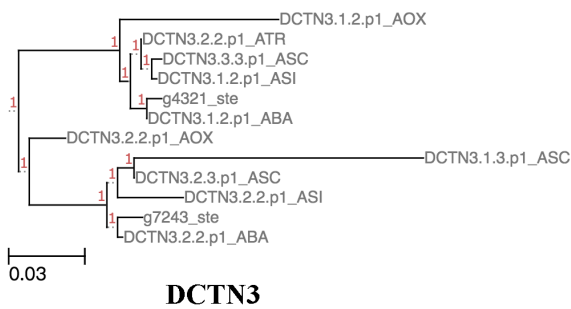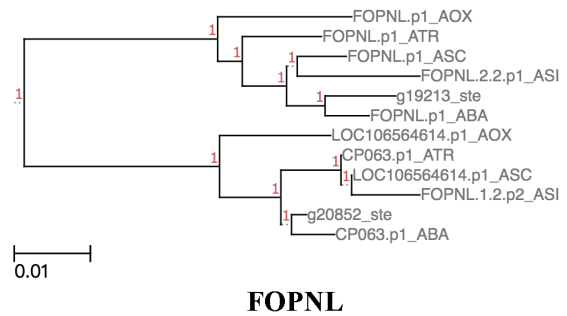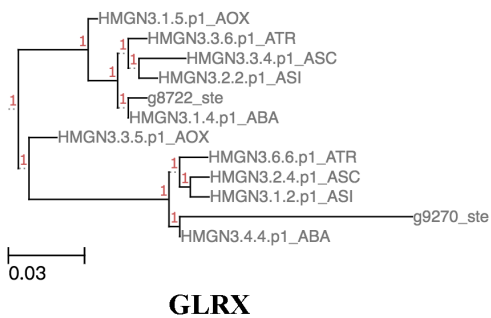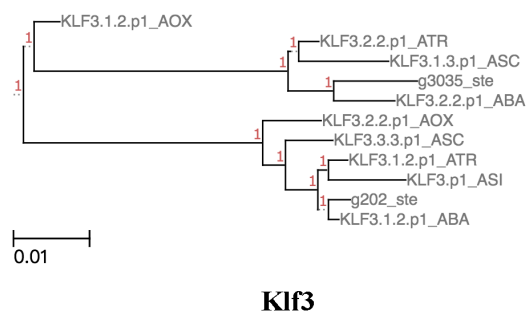

**Supplementary Fig. 26. Examples of gene trees indicating the sterlet WGD happened before the sterlet/*A. oxyrinchus* split.** Gene trees were constructed using TreeBeST 0.5.1. The last three letters after “\_” of each tip refer to species names as follows, “ste” refers to sterlet; “AOX”, *A. oxyrinchus*; “ATR”, *A. transmontanus*; “ASC”, *A. schrencki*; “ASI”, *A. sinensis*; and “ABA”, *A. baerii*.

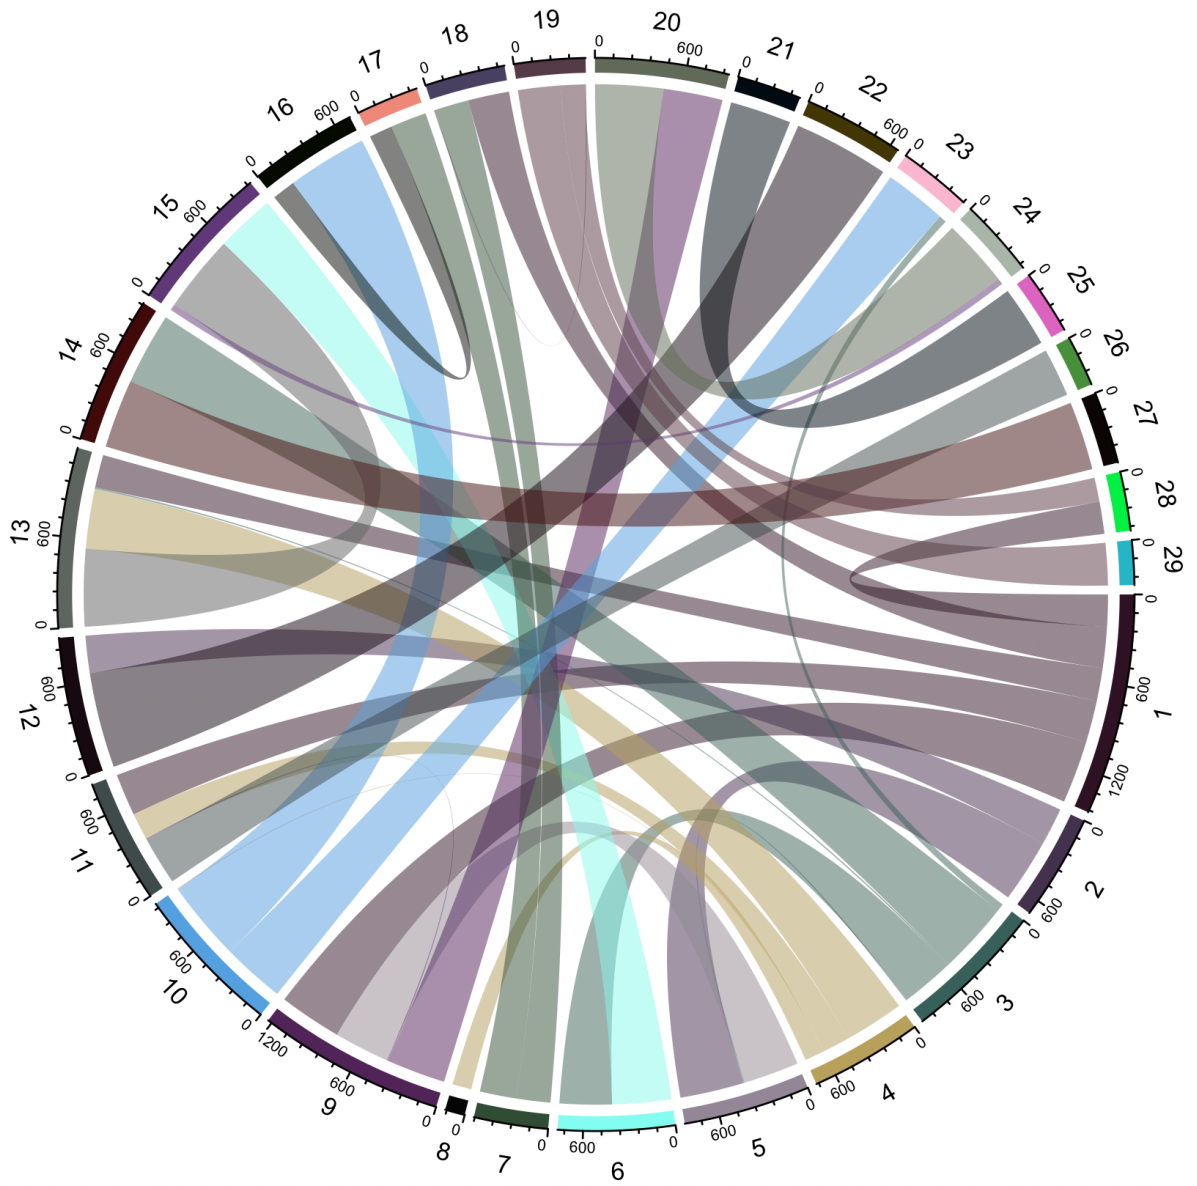

Supplementary Fig. 27. Chord diagram for Atlantic salmon

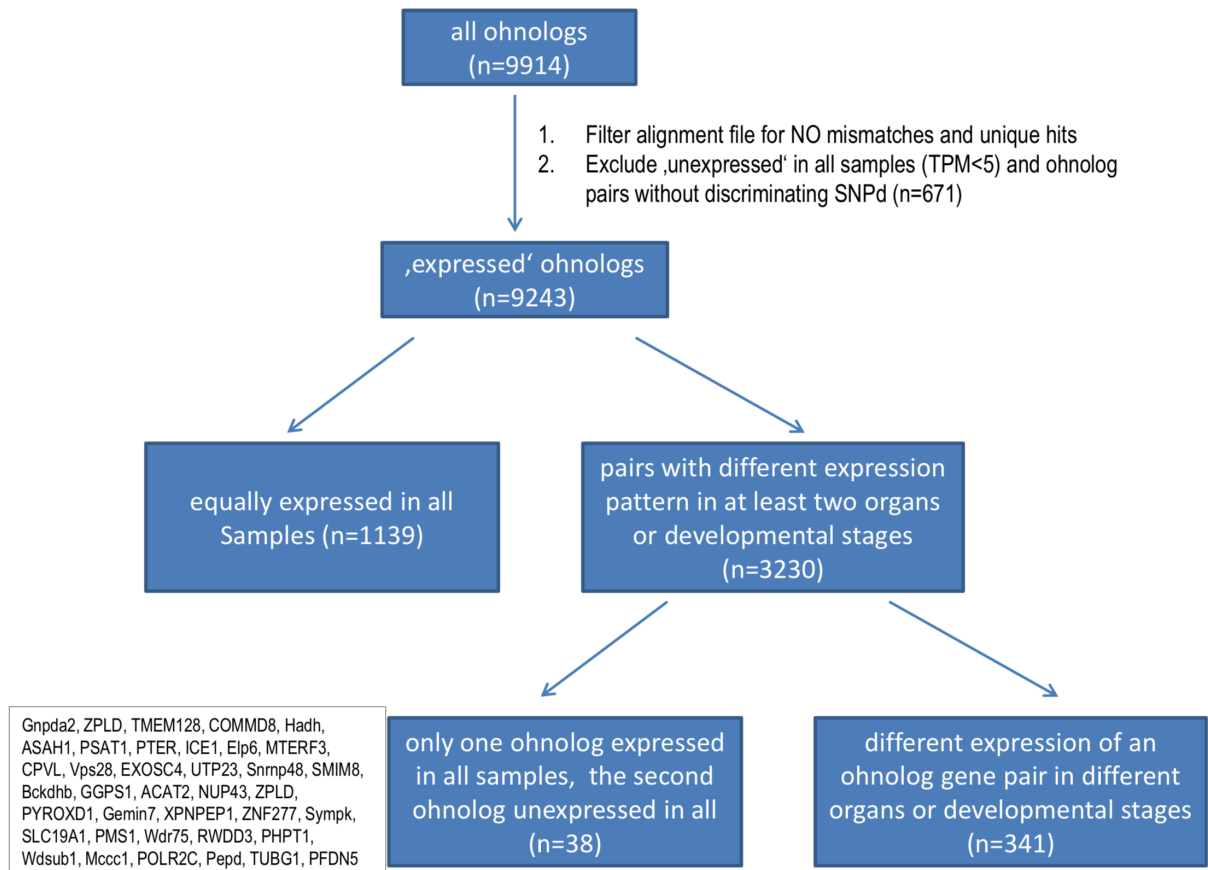

**Supplementary Fig. 28. Scheme of ohnolog groups with different expression patterns.**

# Supplementary Data 1

## ARU\_1p

Chromosome HiC\_scaffold\_1

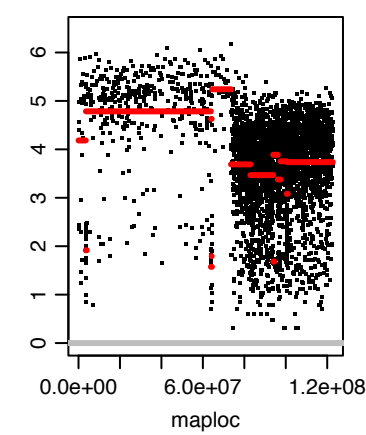

Chromosome HiC\_scaffold\_10

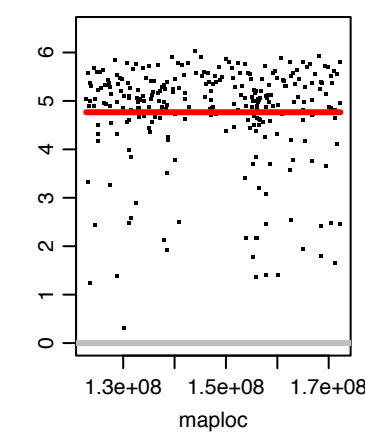

Chromosome HiC\_scaffold\_11

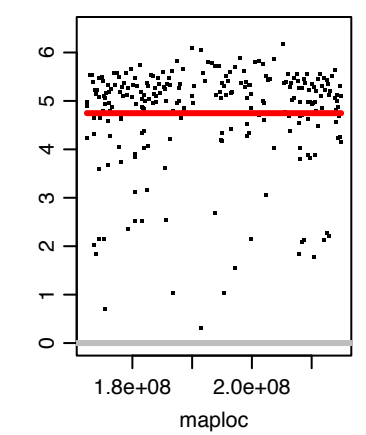

Chromosome HiC\_scaffold\_12

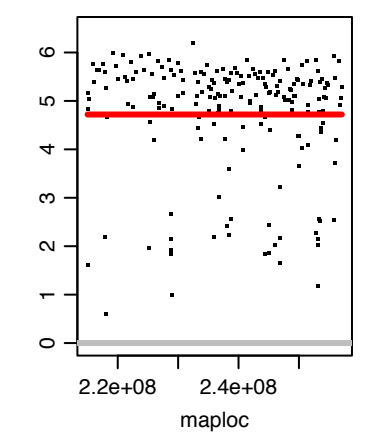

Chromosome HiC\_scaffold\_13

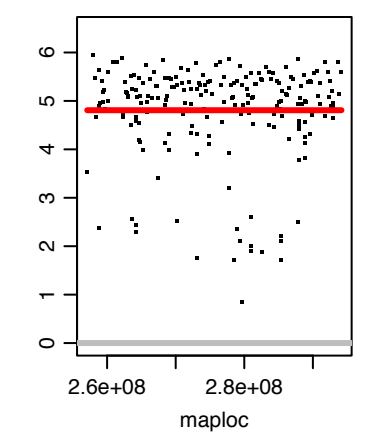

Chromosome HiC\_scaffold\_14

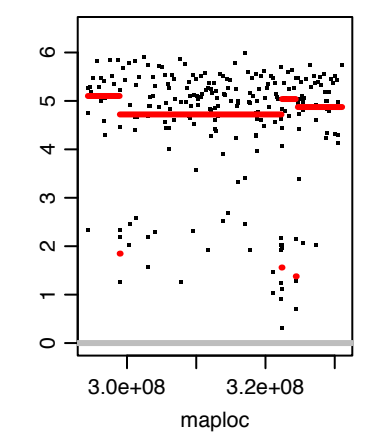

Chromosome HiC\_scaffold\_15

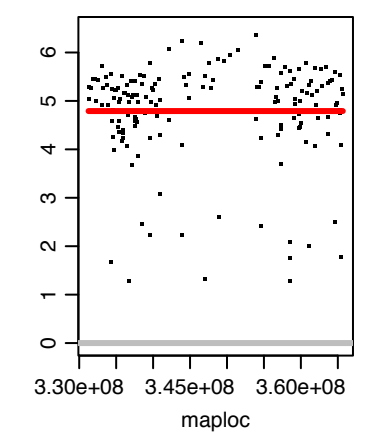

Chromosome HiC\_scaffold\_16

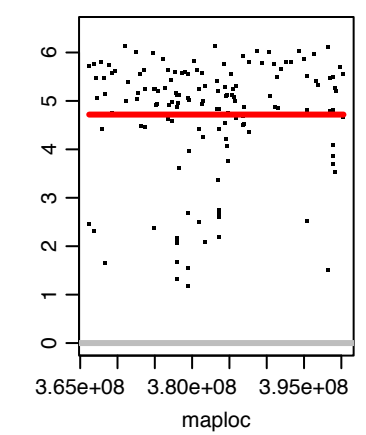

Chromosome HiC\_scaffold\_17

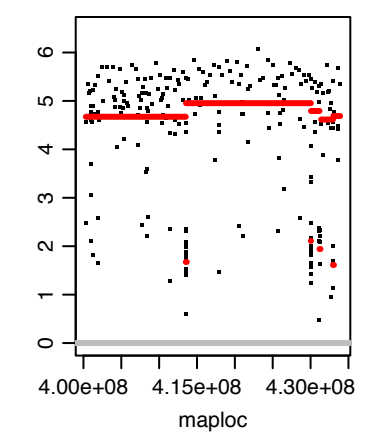

Chromosome HiC\_scaffold\_18

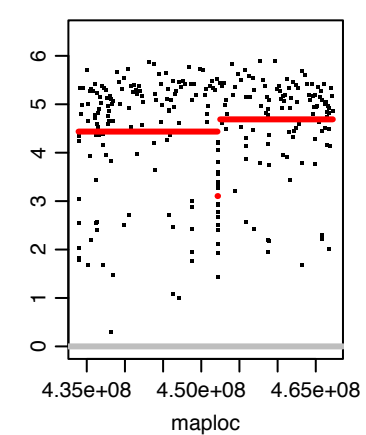

Chromosome HiC\_scaffold\_19

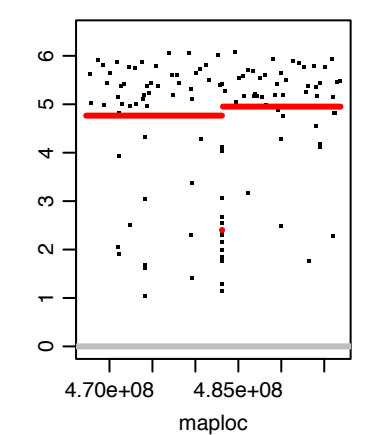

Chromosome HiC\_scaffold\_2

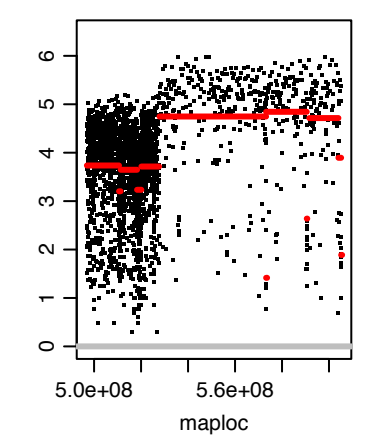

Chromosome HiC\_scaffold\_20

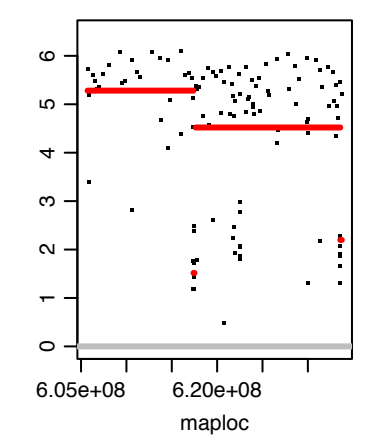

Chromosome HiC\_scaffold\_21

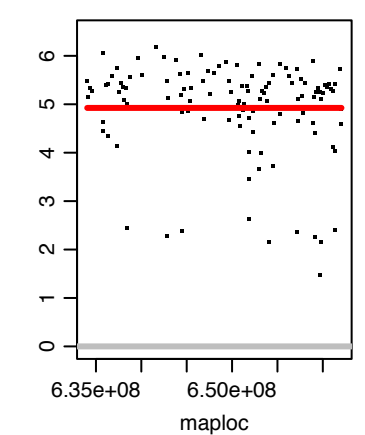

Chromosome HiC\_scaffold\_22

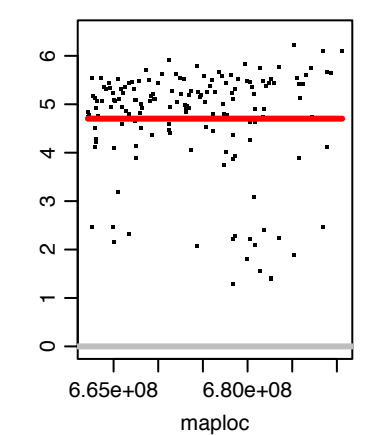

Chromosome HiC\_scaffold\_23

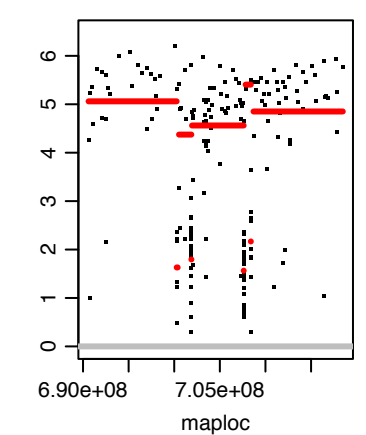

Chromosome HiC\_scaffold\_24

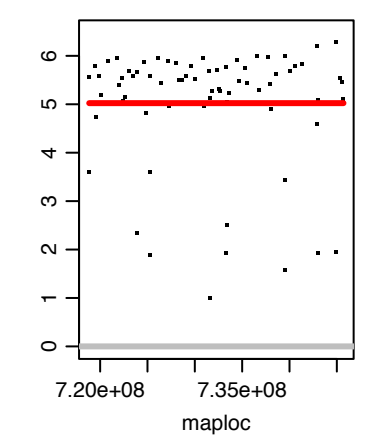

Chromosome HiC\_scaffold\_25

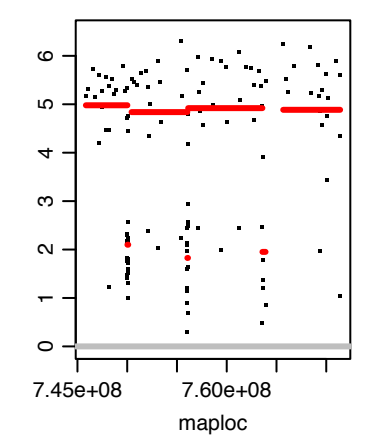

Chromosome HiC\_scaffold\_26

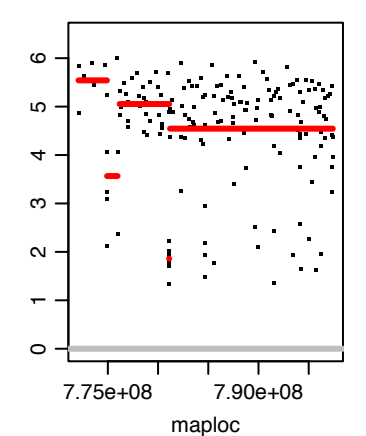

Chromosome HiC\_scaffold\_27

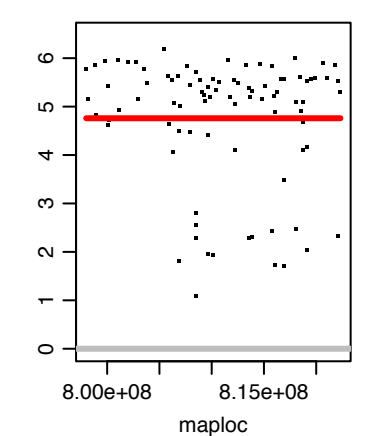

Chromosome HiC\_scaffold\_28

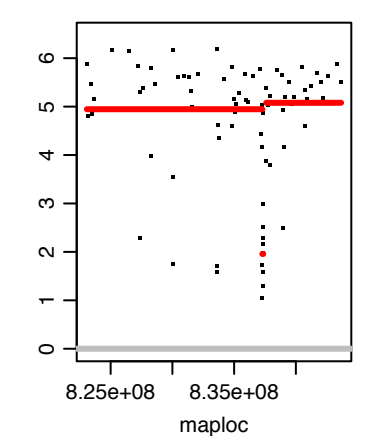

Chromosome HiC\_scaffold\_29

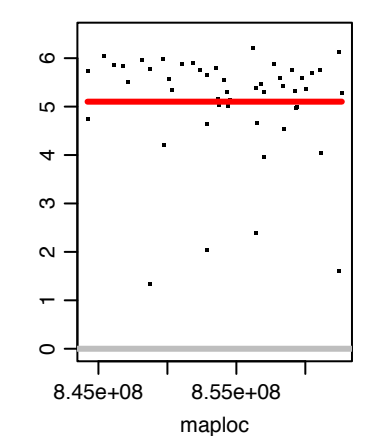

Chromosome HiC\_scaffold\_3

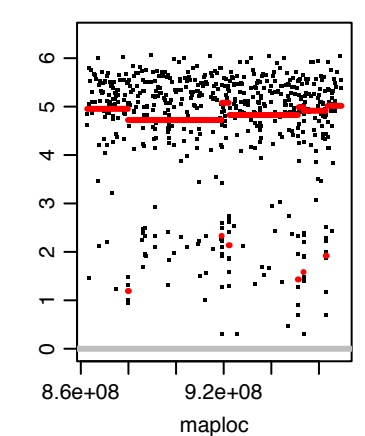

Chromosome HiC\_scaffold\_30

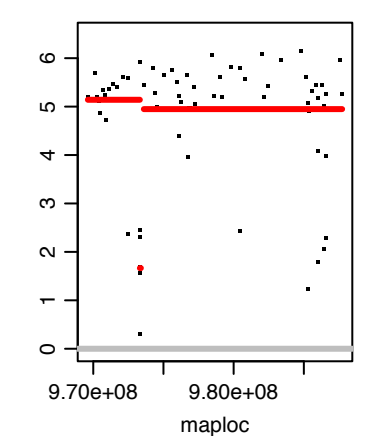

Chromosome HiC\_scaffold\_31

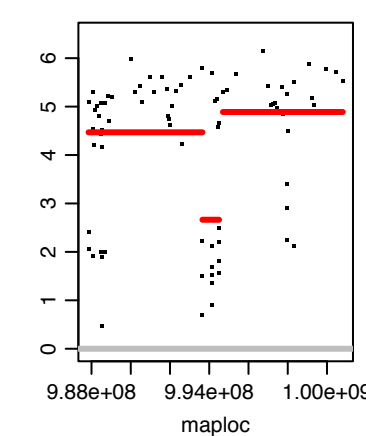

Chromosome HiC\_scaffold\_32

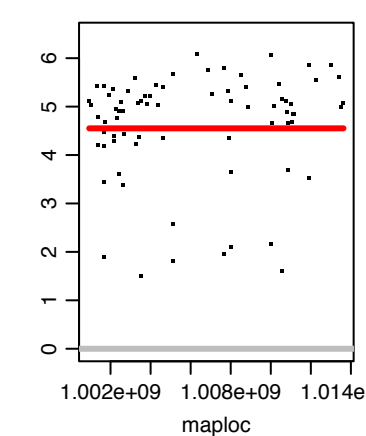

Chromosome HiC\_scaffold\_33

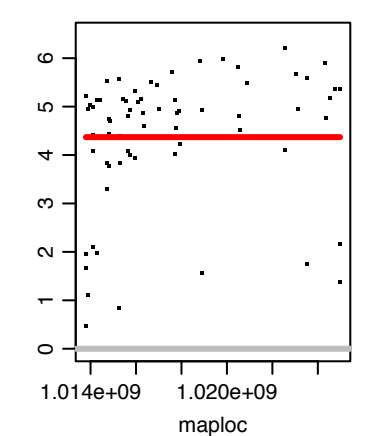

Chromosome HiC\_scaffold\_34

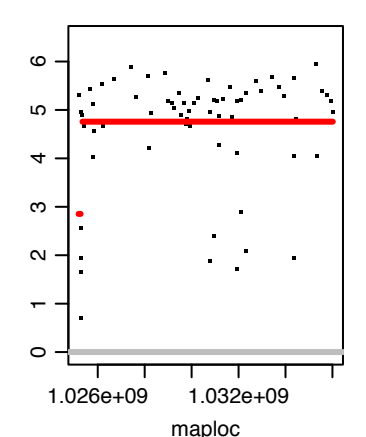

Chromosome HiC\_scaffold\_35

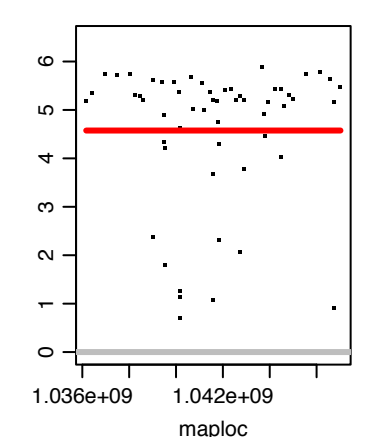

Chromosome HiC\_scaffold\_36

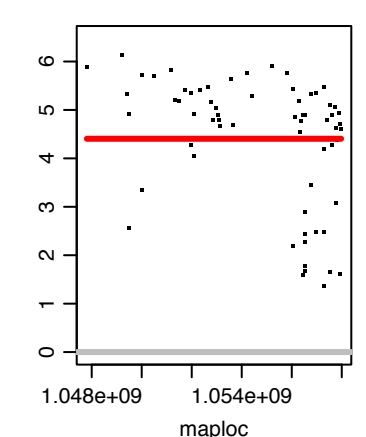

Chromosome HiC\_scaffold\_37

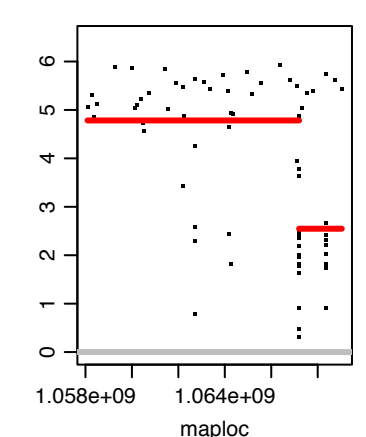

Chromosome HiC\_scaffold\_38

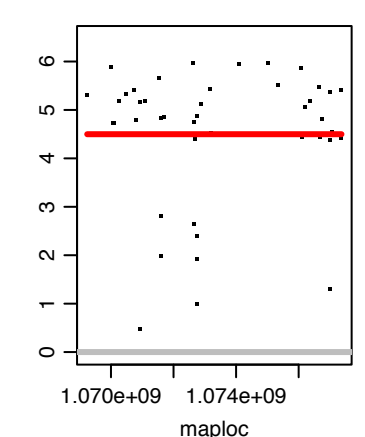

Chromosome HiC\_scaffold\_39

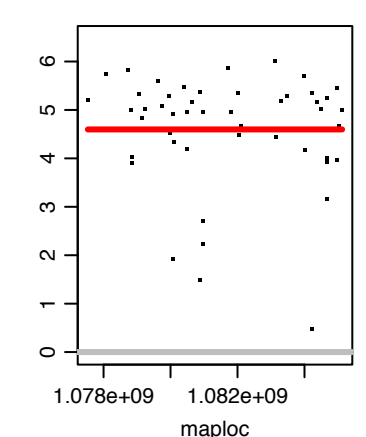

Chromosome HiC\_scaffold\_4

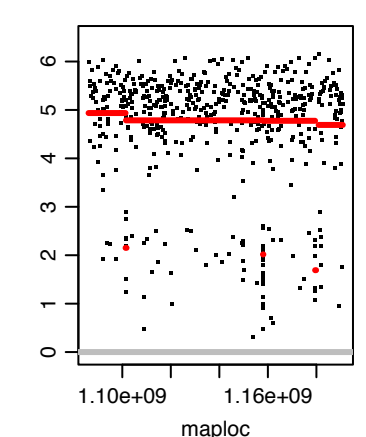

Chromosome HiC\_scaffold\_40

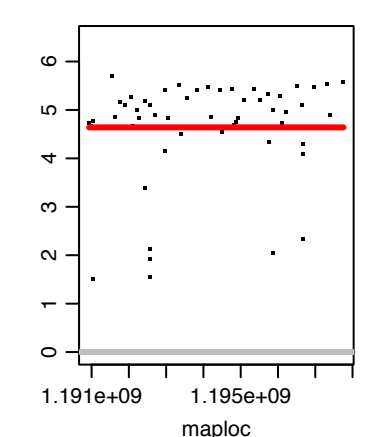

Chromosome HiC\_scaffold\_41

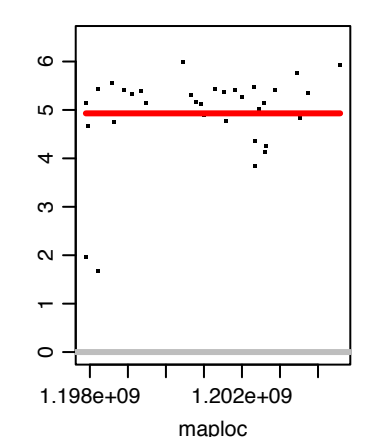

Chromosome HiC\_scaffold\_42

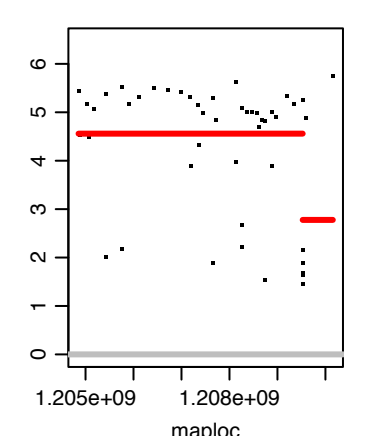

Chromosome HiC\_scaffold\_43

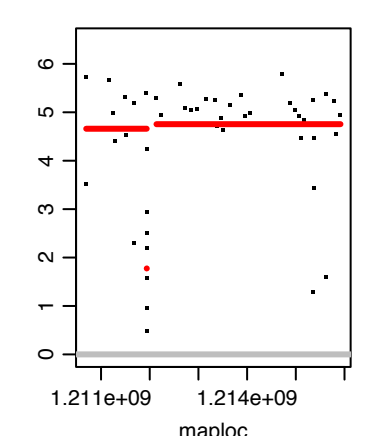

Chromosome HiC\_scaffold\_44

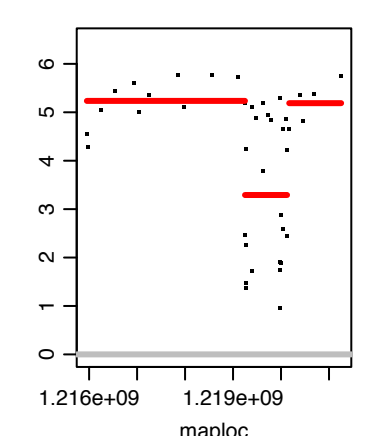

Chromosome HiC\_scaffold\_45

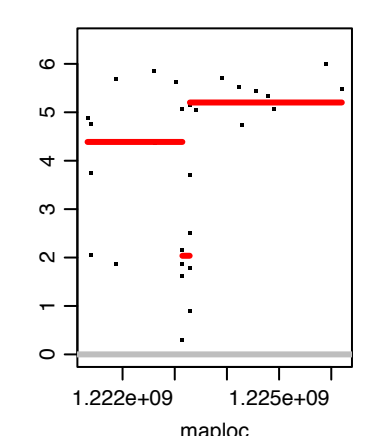

Chromosome HiC\_scaffold\_46

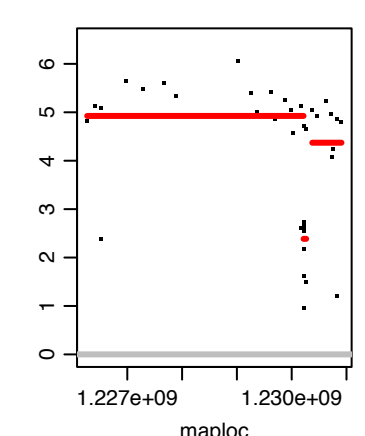

Chromosome HiC\_scaffold\_47

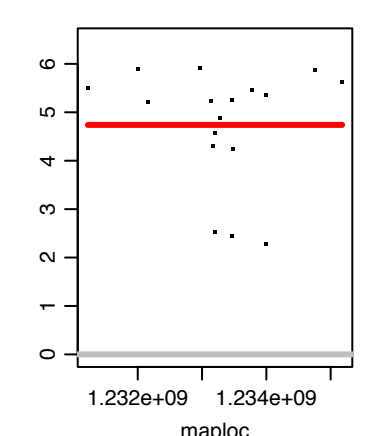

Chromosome HiC\_scaffold\_48

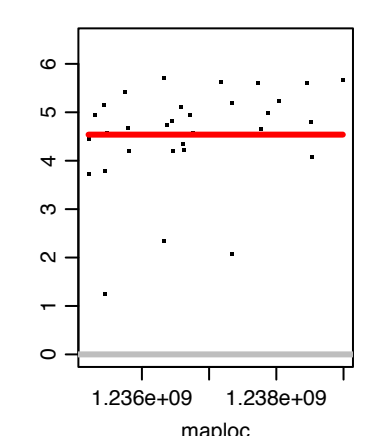

Chromosome HiC\_scaffold\_49

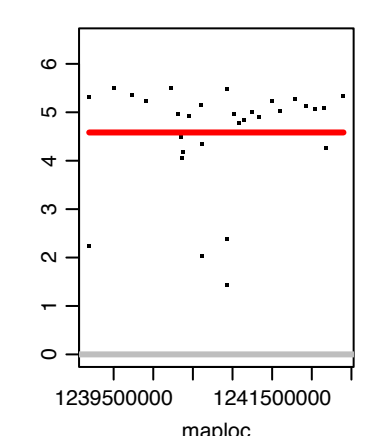

Chromosome HiC\_scaffold\_5

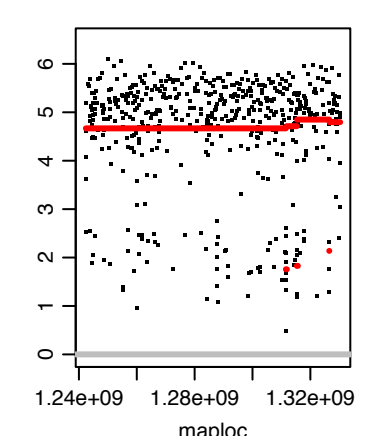

Chromosome HiC\_scaffold\_50

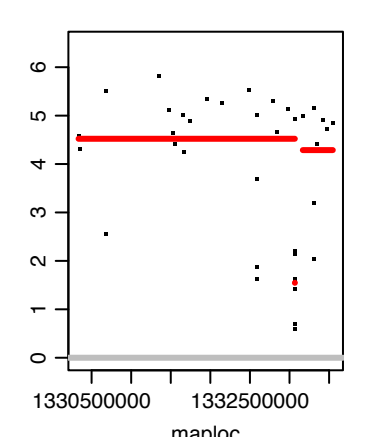

Chromosome HiC\_scaffold\_51

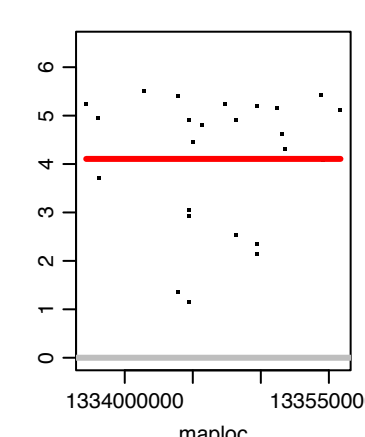

Chromosome HiC\_scaffold\_52

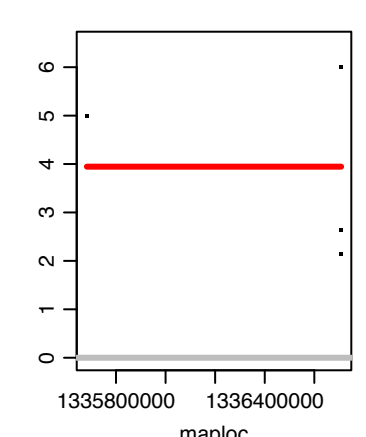

Chromosome HiC\_scaffold\_53

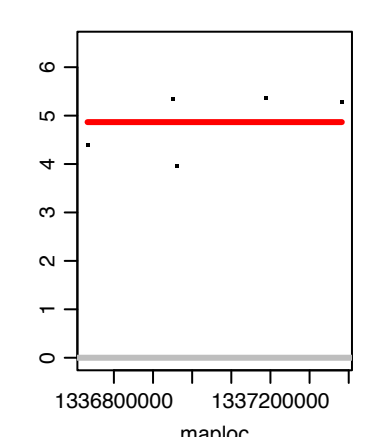

Chromosome HiC\_scaffold\_54

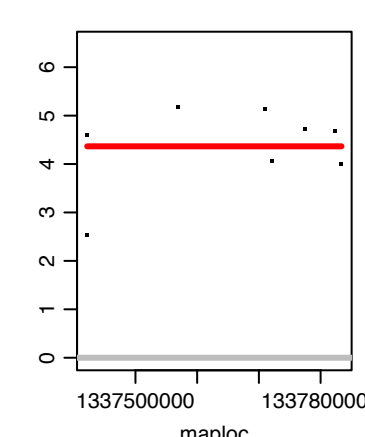

Chromosome HiC\_scaffold\_55

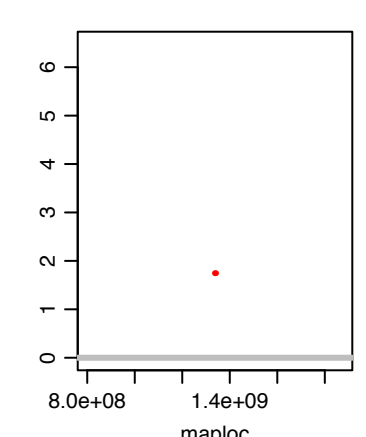

Chromosome HiC\_scaffold\_6

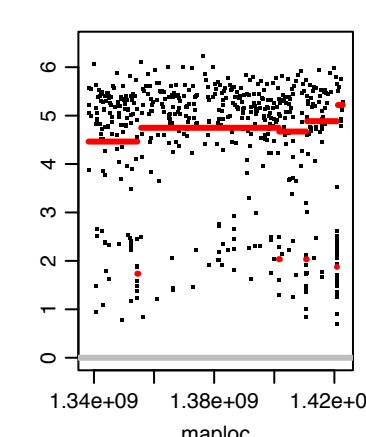

Chromosome HiC\_scaffold\_7

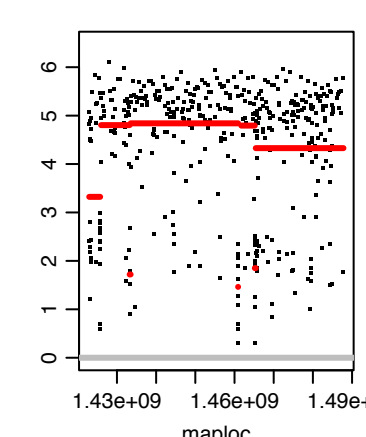

Chromosome HiC\_scaffold\_8

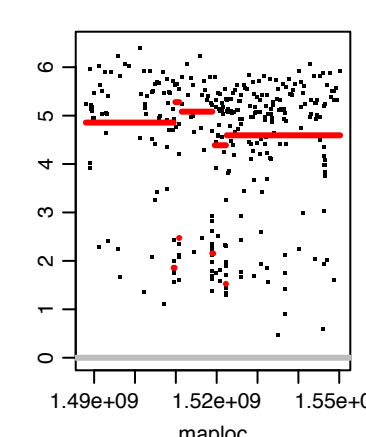

Chromosome HiC\_scaffold\_9

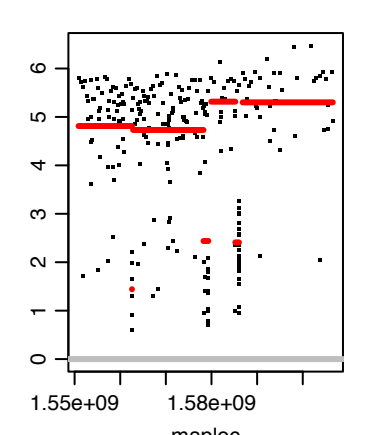





ARU\_2q

Chromosome HiC\_scaffold\_1

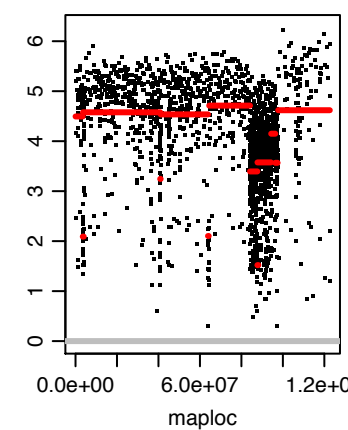

Chromosome HiC\_scaffold\_10

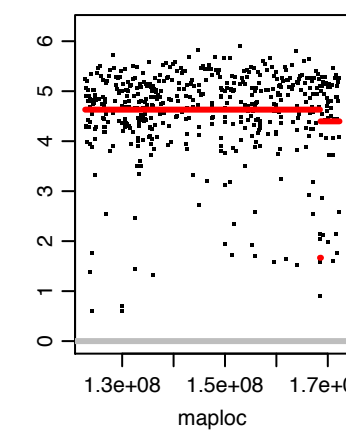

Chromosome HiC\_scaffold\_11

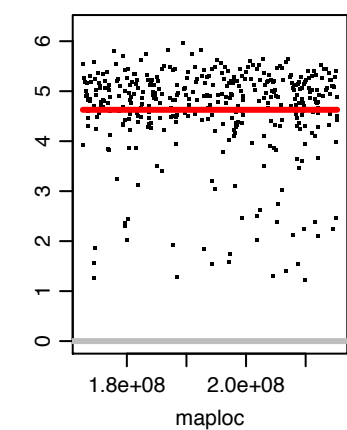

Chromosome HiC\_scaffold\_12

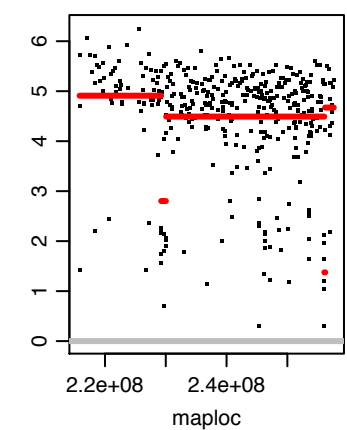

Chromosome HiC\_scaffold\_13

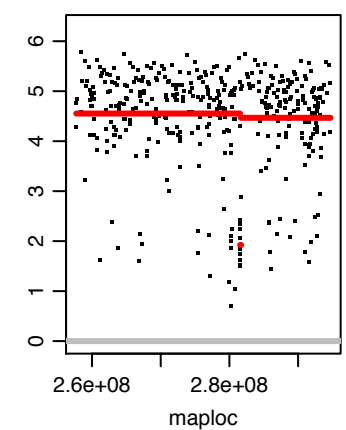

Chromosome HiC\_scaffold\_14

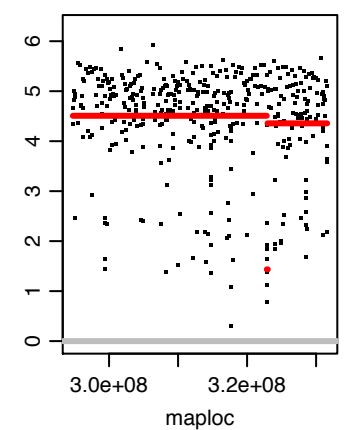

Chromosome HiC\_scaffold\_15

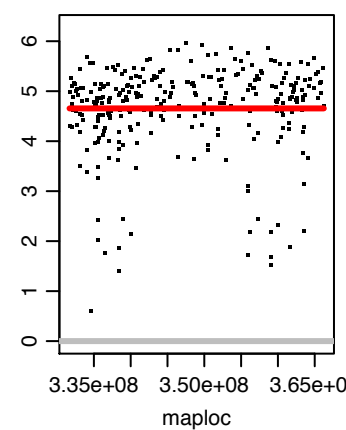

Chromosome HiC\_scaffold\_16

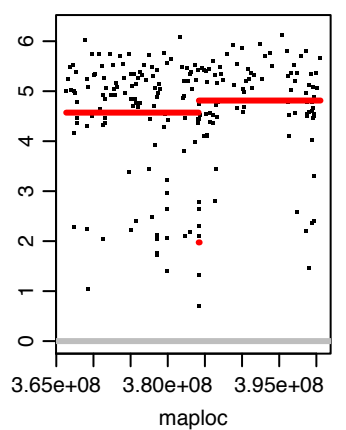

Chromosome HiC\_scaffold\_17

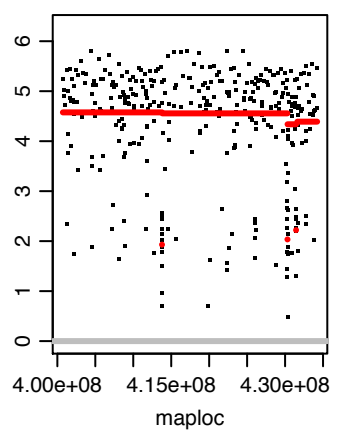

Chromosome HiC\_scaffold\_18

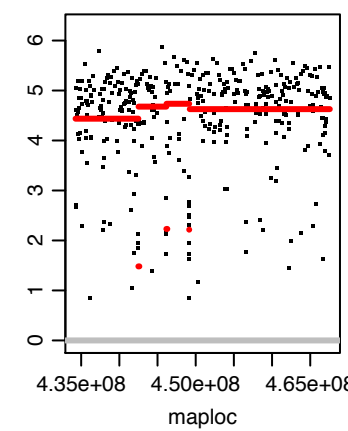

Chromosome HiC\_scaffold\_19

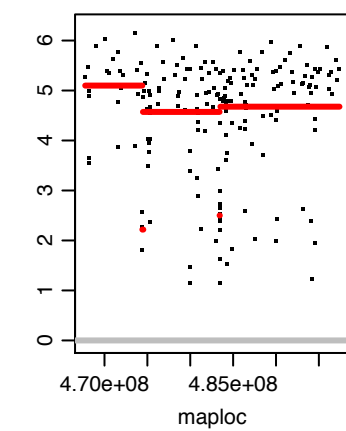

Chromosome HiC\_scaffold\_2

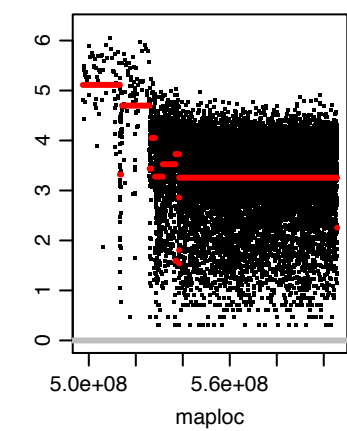

Chromosome HiC\_scaffold\_20

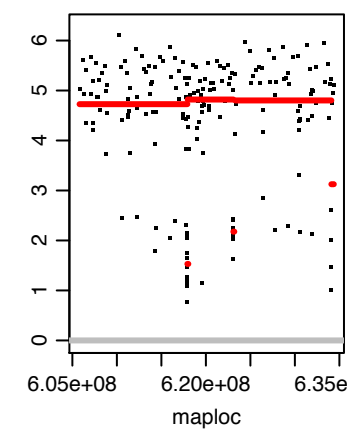

Chromosome HiC\_scaffold\_21

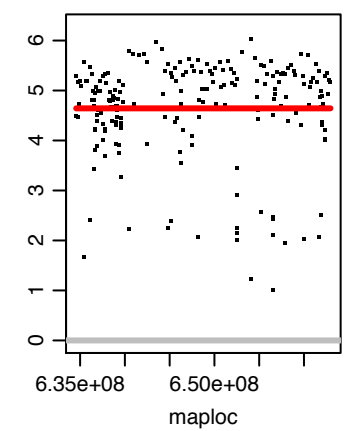

Chromosome HiC\_scaffold\_22

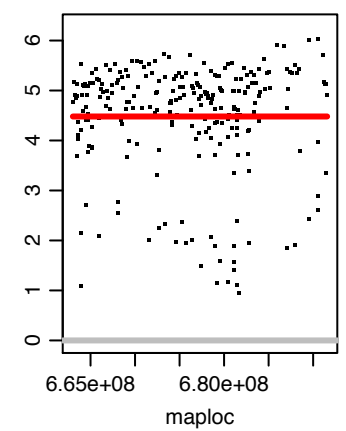

Chromosome HiC\_scaffold\_23

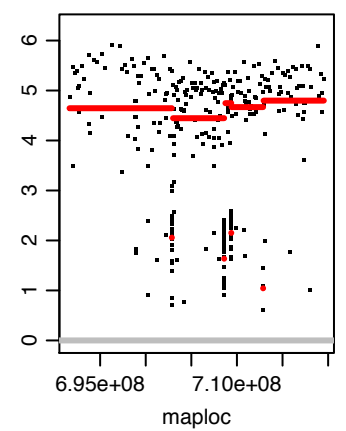

Chromosome HiC\_scaffold\_24

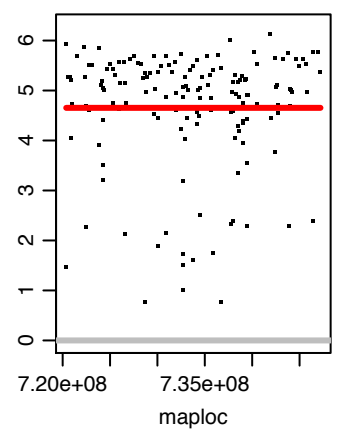

Chromosome HiC\_scaffold\_25

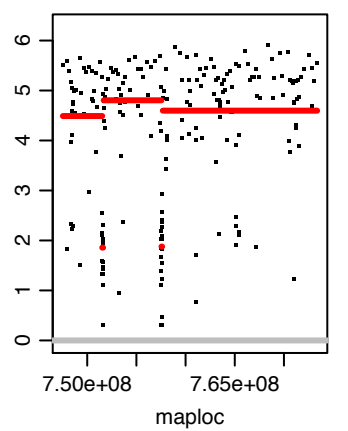

Chromosome HiC\_scaffold\_26

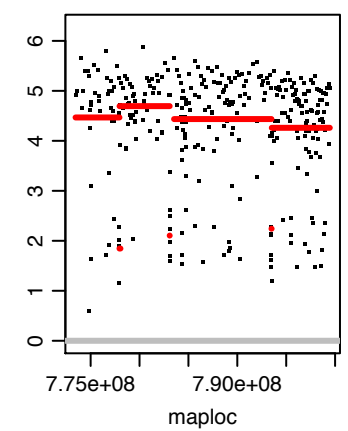

Chromosome HiC\_scaffold\_27

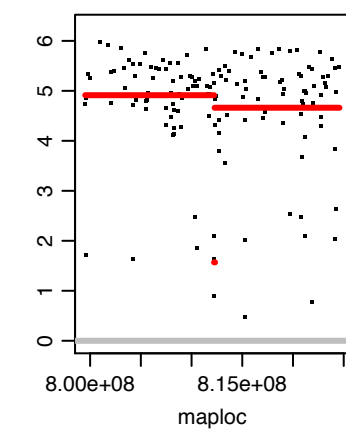

Chromosome HiC\_scaffold\_28

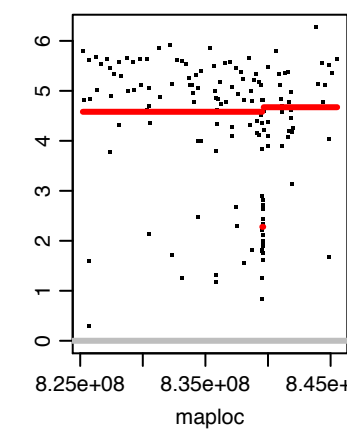

Chromosome HiC\_scaffold\_29

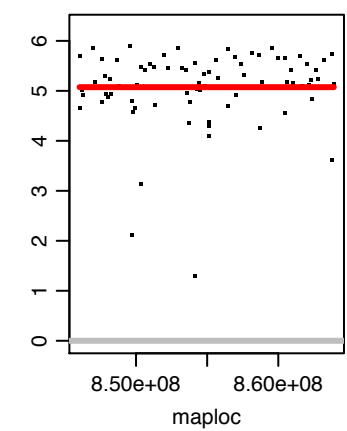

Chromosome HiC\_scaffold\_3

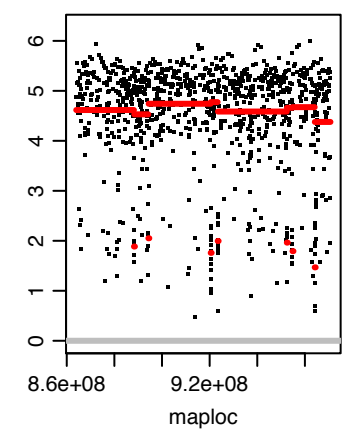

Chromosome HiC\_scaffold\_30

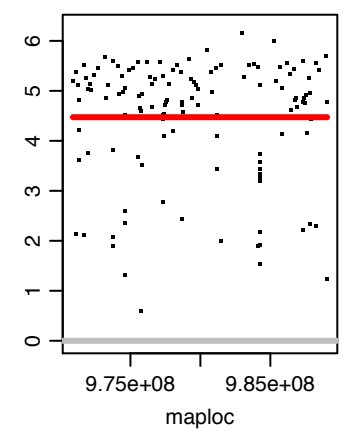

Chromosome HiC\_scaffold\_31

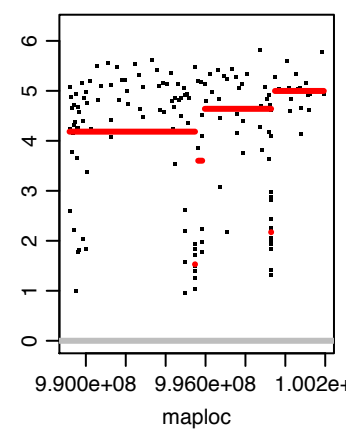

Chromosome HiC\_scaffold\_32

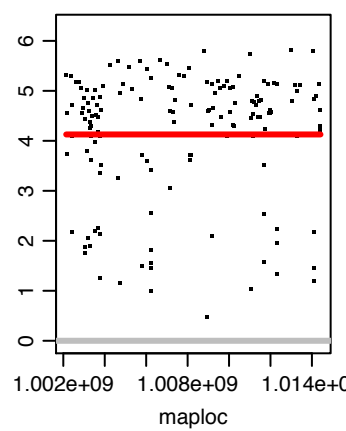

Chromosome HiC\_scaffold\_33

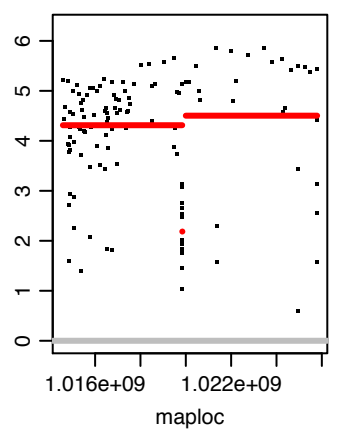

Chromosome HiC\_scaffold\_34

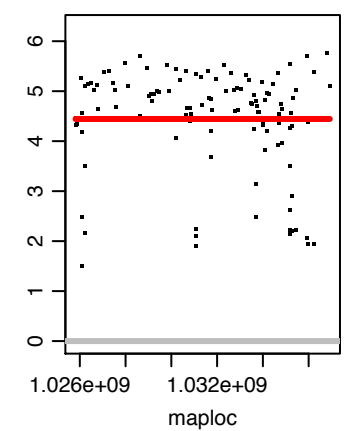

Chromosome HiC\_scaffold\_35

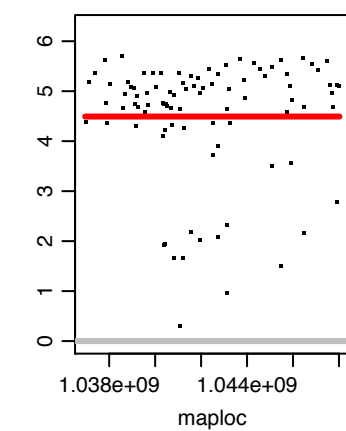

Chromosome HiC\_scaffold\_36

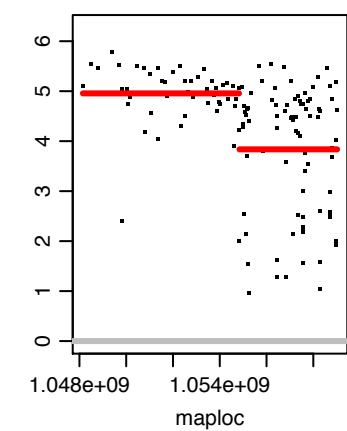

Chromosome HiC\_scaffold\_37

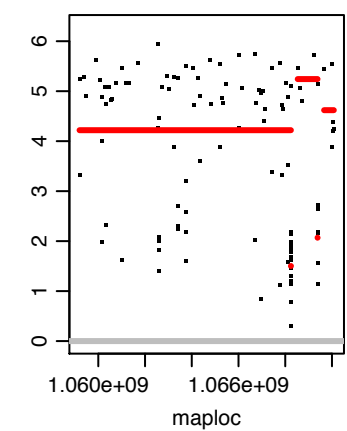

Chromosome HiC\_scaffold\_38

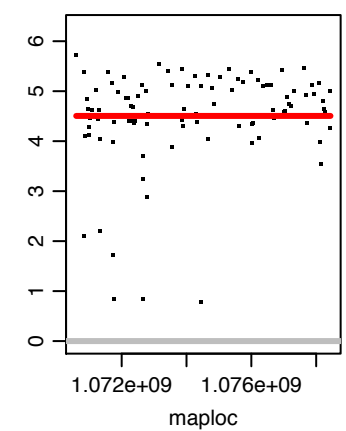

Chromosome HiC\_scaffold\_39

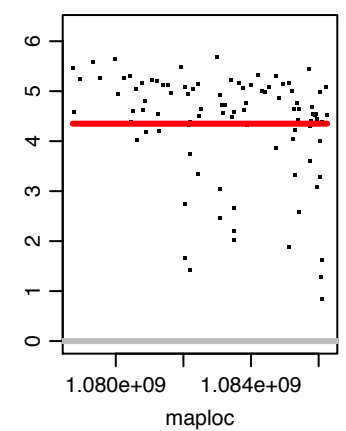

Chromosome HiC\_scaffold\_4

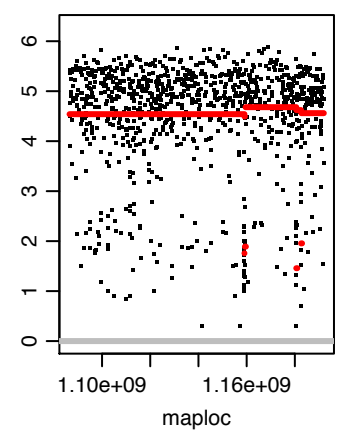

Chromosome HiC\_scaffold\_40

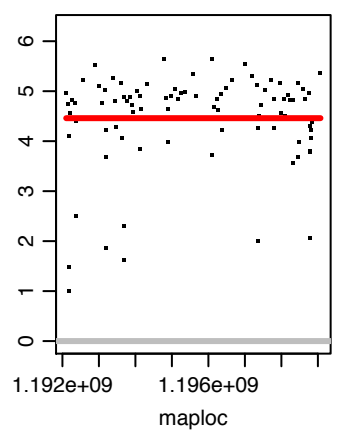

Chromosome HiC\_scaffold\_41

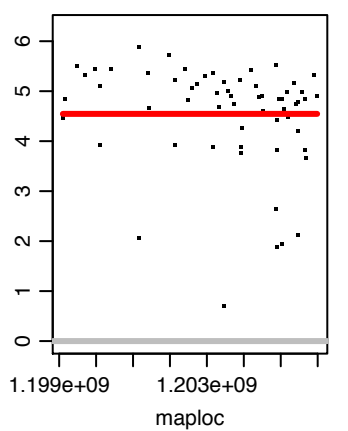

Chromosome HiC\_scaffold\_42

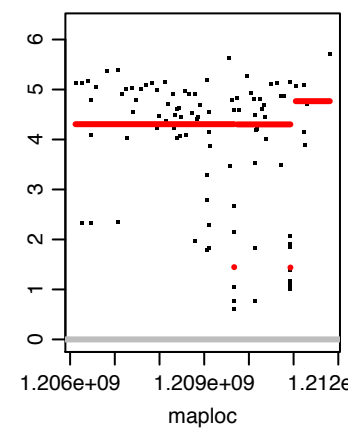

Chromosome HiC\_scaffold\_43

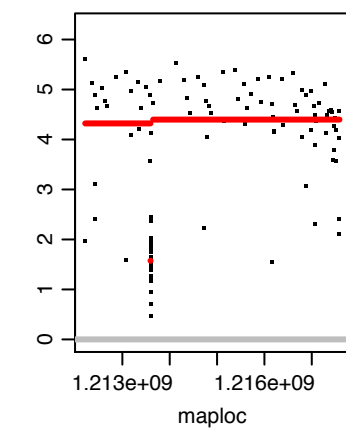

Chromosome HiC\_scaffold\_44

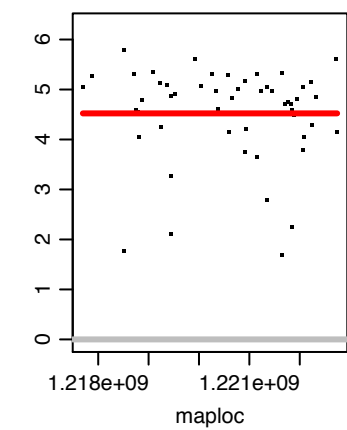

Chromosome HiC\_scaffold\_45

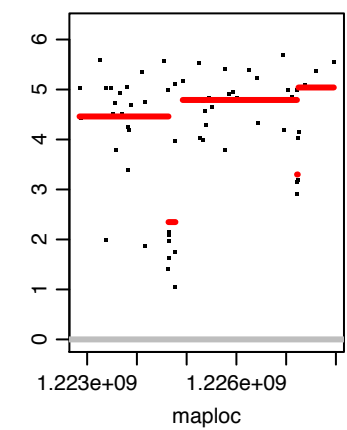

Chromosome HiC\_scaffold\_46

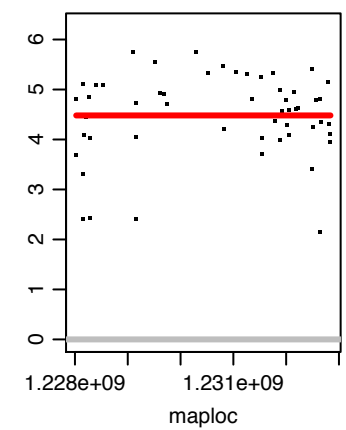

Chromosome HiC\_scaffold\_47

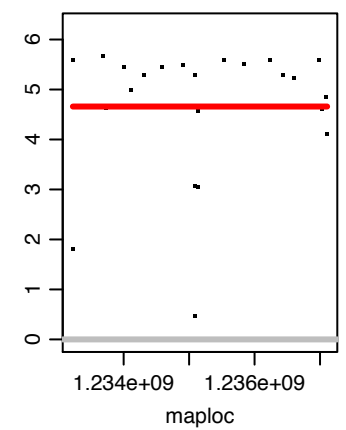

Chromosome HiC\_scaffold\_48

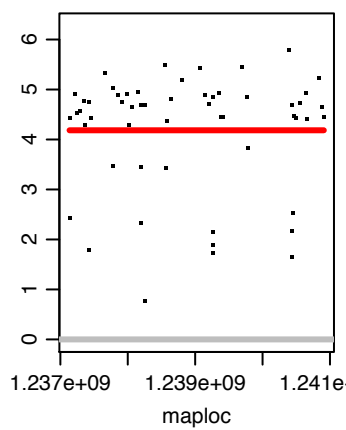

Chromosome HiC\_scaffold\_49

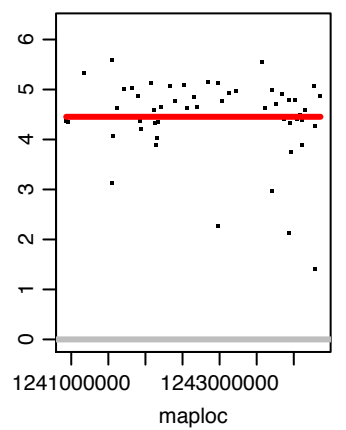

Chromosome HiC\_scaffold\_5

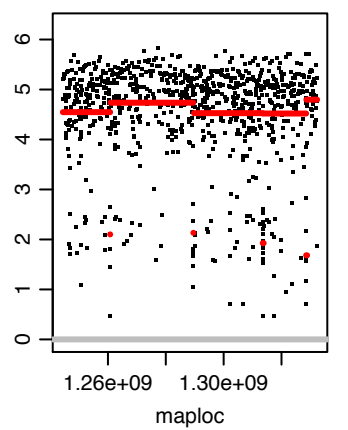

Chromosome HiC\_scaffold\_50

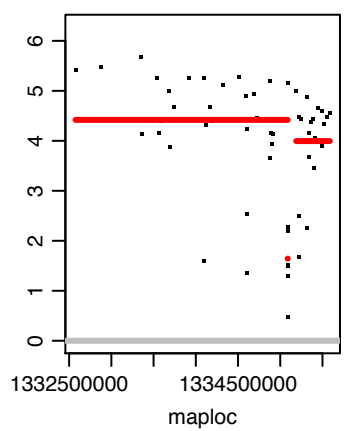

Chromosome HiC\_scaffold\_51

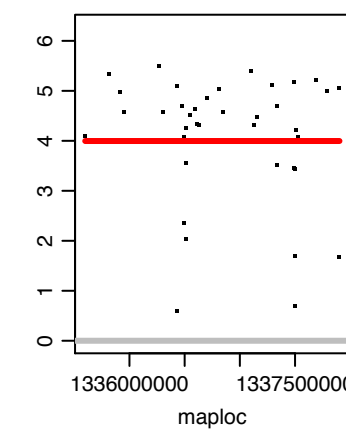

Chromosome HiC\_scaffold\_52

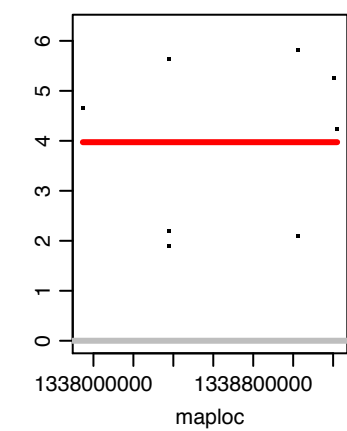

Chromosome HiC\_scaffold\_53

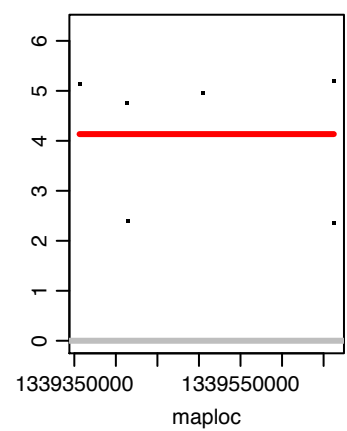

Chromosome HiC\_scaffold\_54

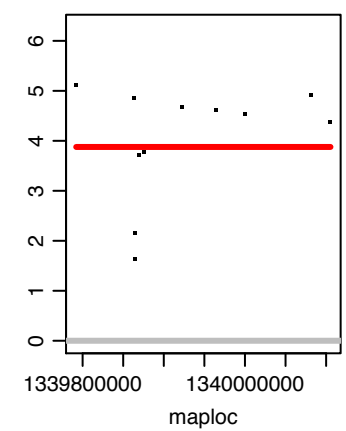

Chromosome HiC\_scaffold\_55

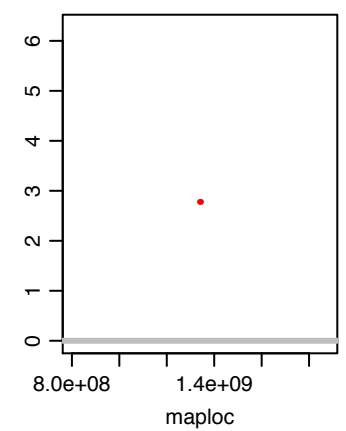

Chromosome HiC\_scaffold\_6

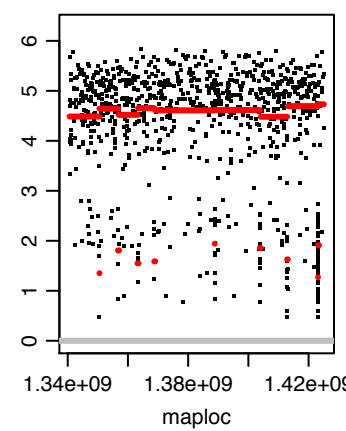

Chromosome HiC\_scaffold\_7

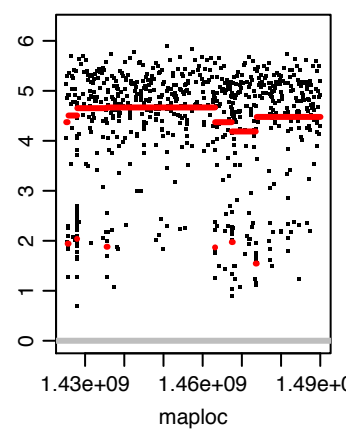

Chromosome HiC\_scaffold\_8

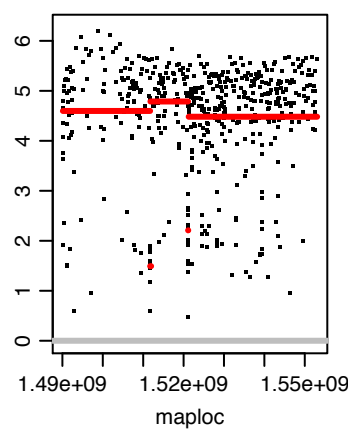

Chromosome HiC\_scaffold\_9

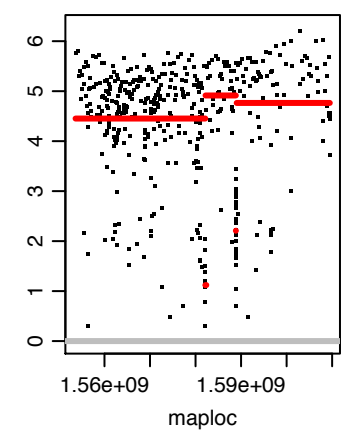

ARU\_3

Chromosome HiC\_scaffold\_1

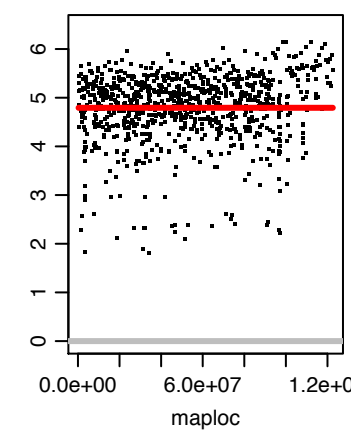

Chromosome HiC\_scaffold\_10

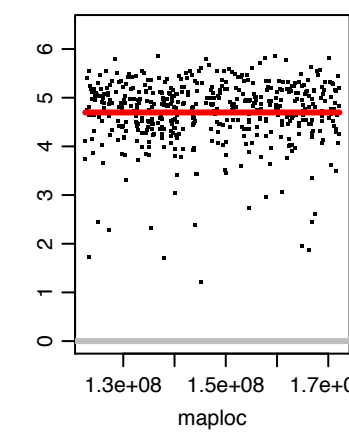

Chromosome HiC\_scaffold\_11

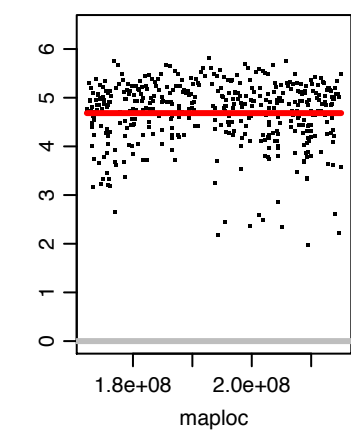

Chromosome HiC\_scaffold\_12

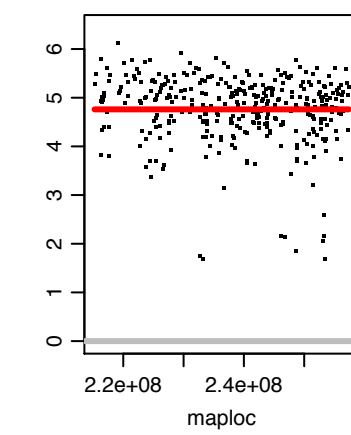

Chromosome HiC\_scaffold\_13

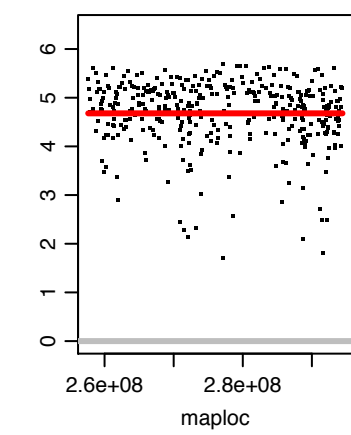

Chromosome HiC\_scaffold\_14

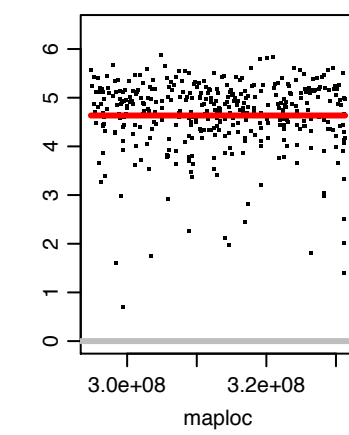

Chromosome HiC\_scaffold\_15

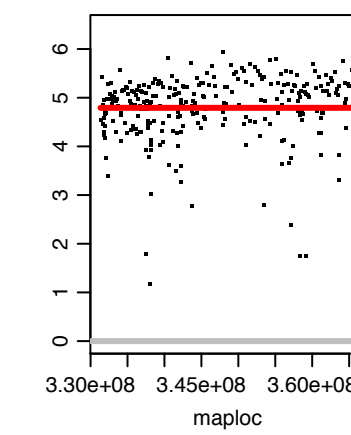

Chromosome HiC\_scaffold\_16

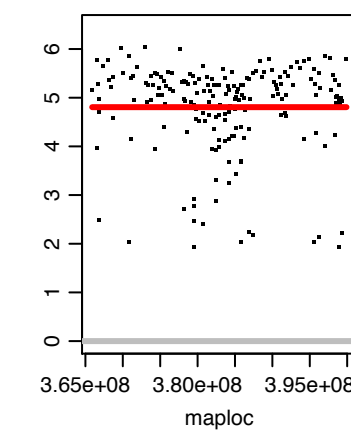

Chromosome HiC\_scaffold\_17

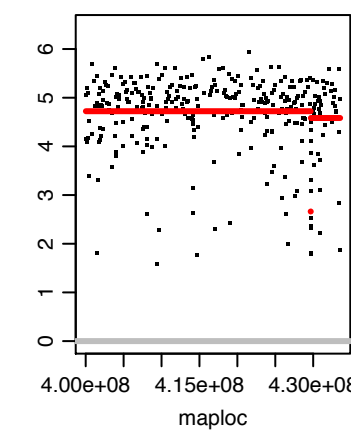

Chromosome HiC\_scaffold\_18

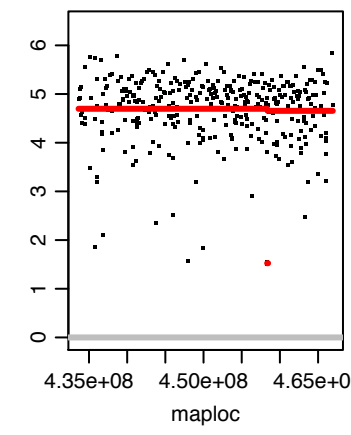

Chromosome HiC\_scaffold\_19

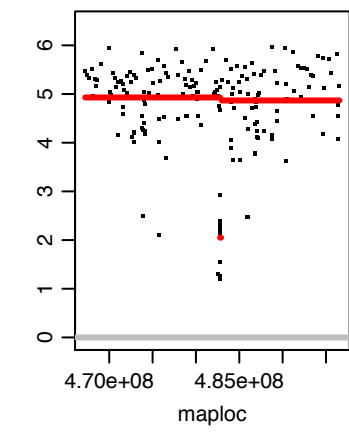

Chromosome HiC\_scaffold\_2

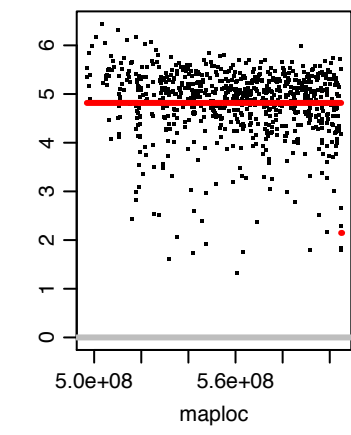

Chromosome HiC\_scaffold\_20

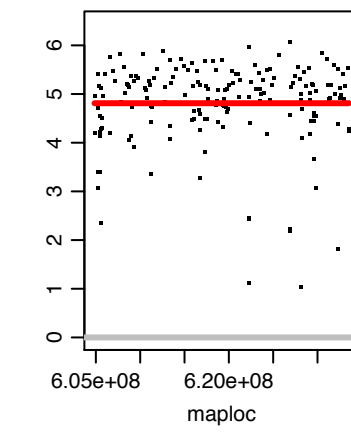

Chromosome HiC\_scaffold\_21

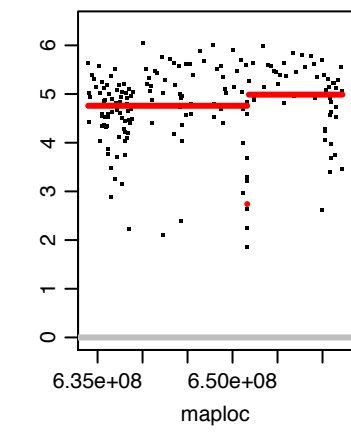

Chromosome HiC\_scaffold\_22

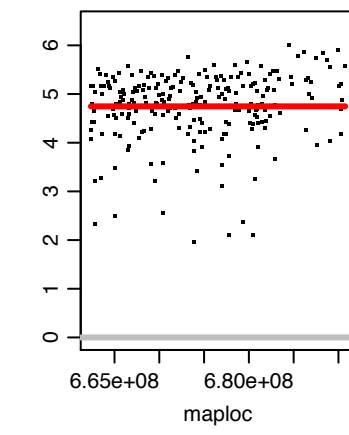

Chromosome HiC\_scaffold\_23

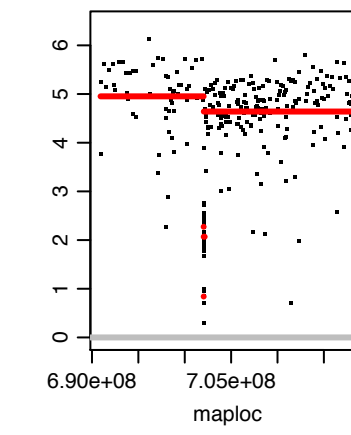

Chromosome HiC\_scaffold\_24

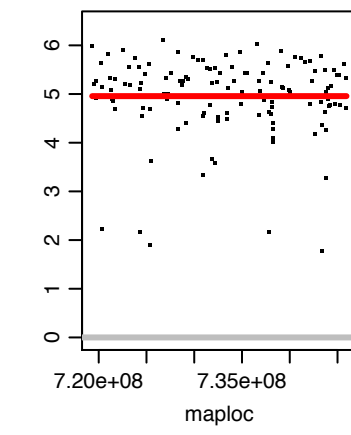

Chromosome HiC\_scaffold\_25

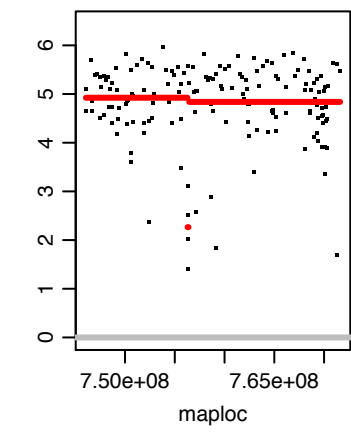

Chromosome HiC\_scaffold\_26

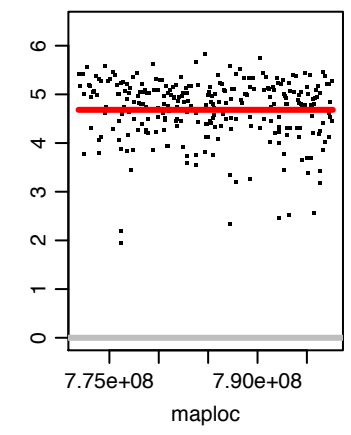

Chromosome HiC\_scaffold\_27

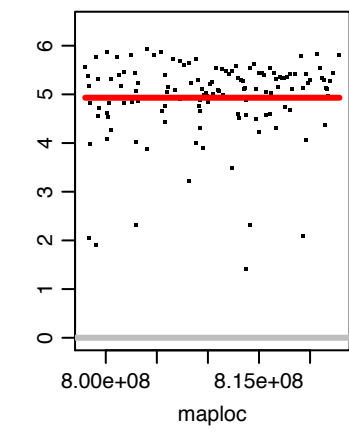

Chromosome HiC\_scaffold\_28

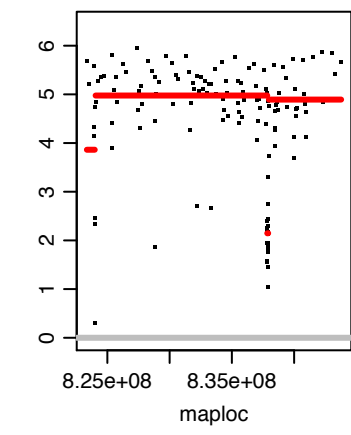

Chromosome HiC\_scaffold\_29

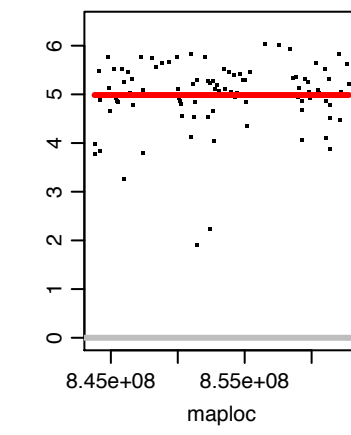

Chromosome HiC\_scaffold\_3

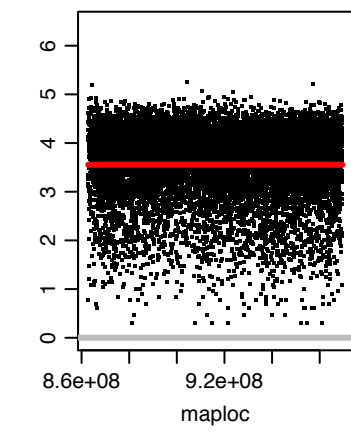

Chromosome HiC\_scaffold\_30

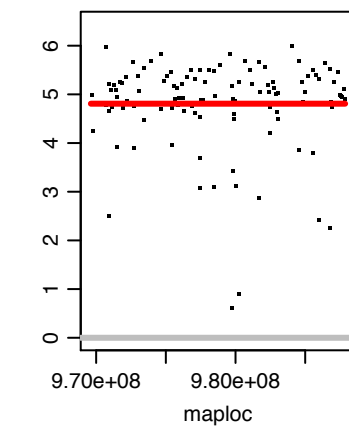

Chromosome HiC\_scaffold\_31

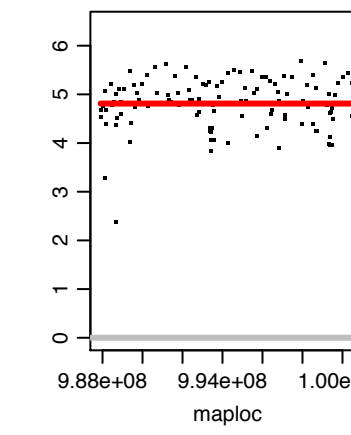

Chromosome HiC\_scaffold\_32

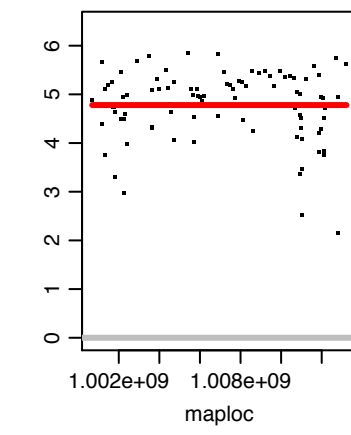

Chromosome HiC\_scaffold\_33

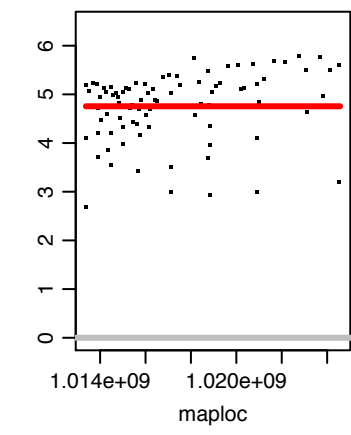

Chromosome HiC\_scaffold\_34

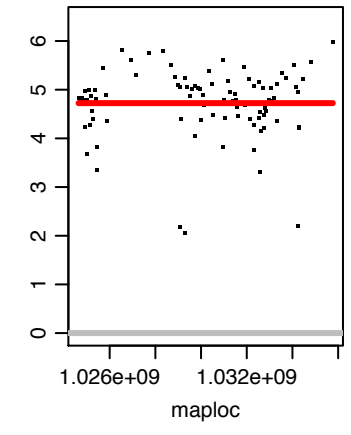

Chromosome HiC\_scaffold\_35

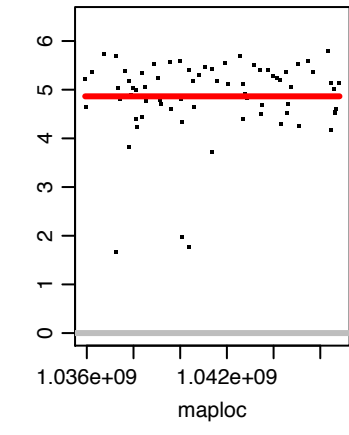

Chromosome HiC\_scaffold\_36

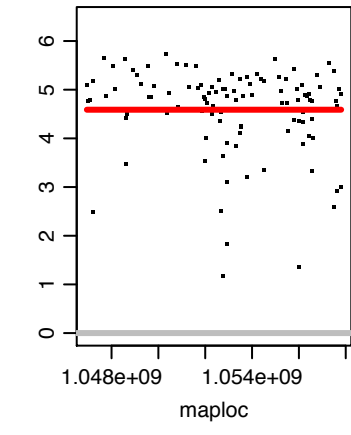

Chromosome HiC\_scaffold\_37

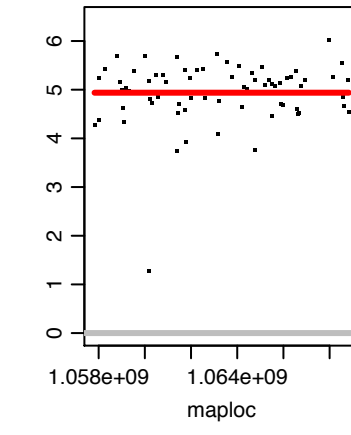

Chromosome HiC\_scaffold\_38

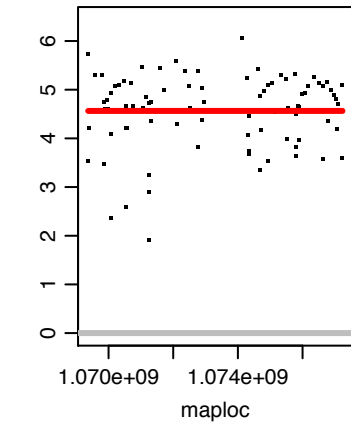

Chromosome HiC\_scaffold\_39

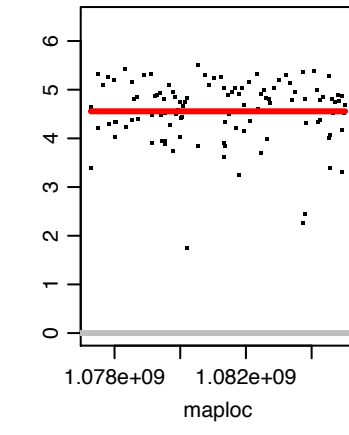

Chromosome HiC\_scaffold\_4

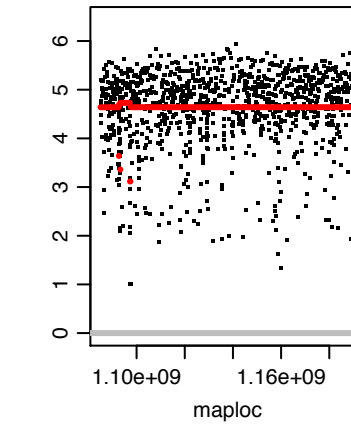

Chromosome HiC\_scaffold\_40

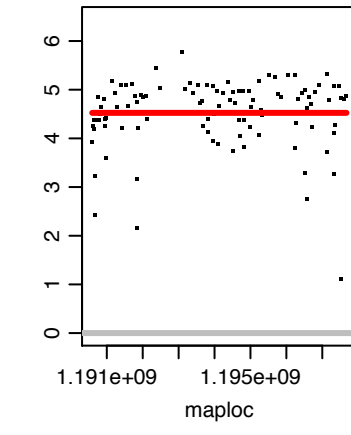

Chromosome HiC\_scaffold\_41

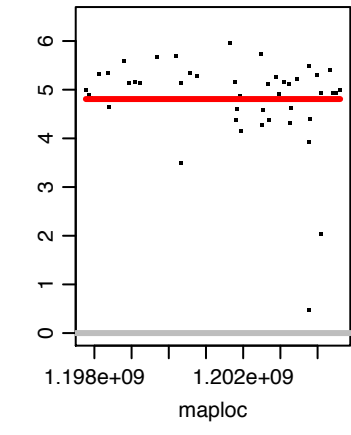

Chromosome HiC\_scaffold\_42

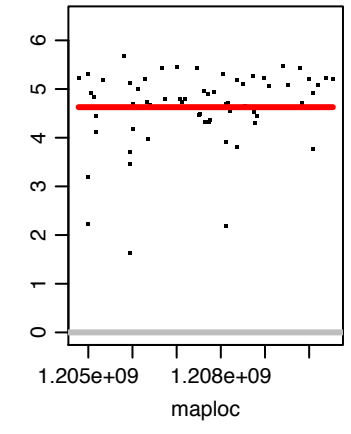

Chromosome HiC\_scaffold\_43

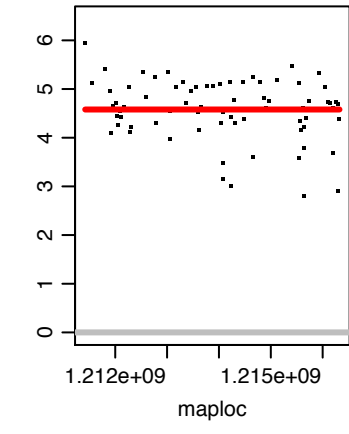

Chromosome HiC\_scaffold\_44

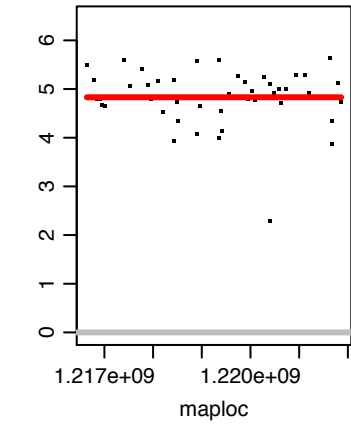

Chromosome HiC\_scaffold\_45

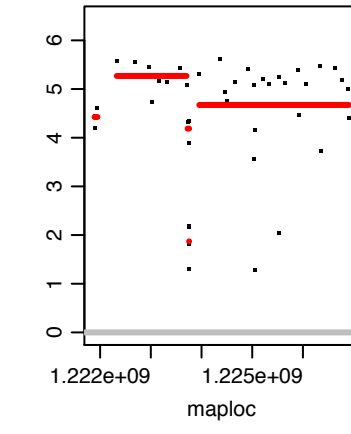

Chromosome HiC\_scaffold\_46

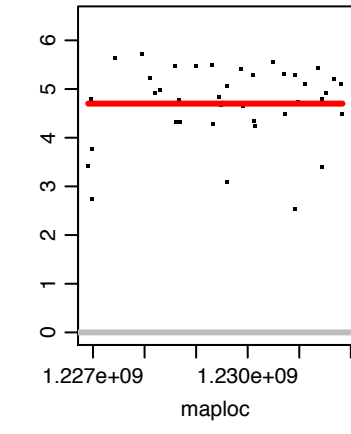

Chromosome HiC\_scaffold\_47

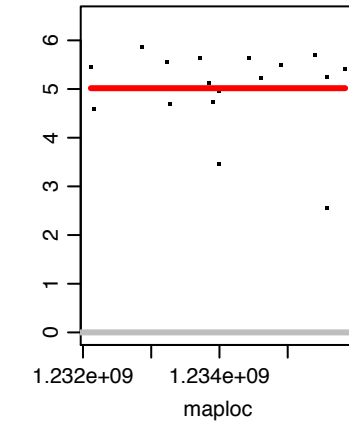

Chromosome HiC\_scaffold\_48

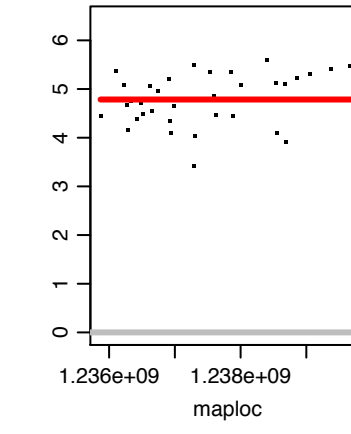

Chromosome HiC\_scaffold\_49

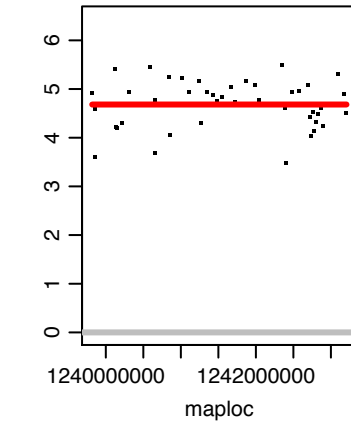

Chromosome HiC\_scaffold\_5

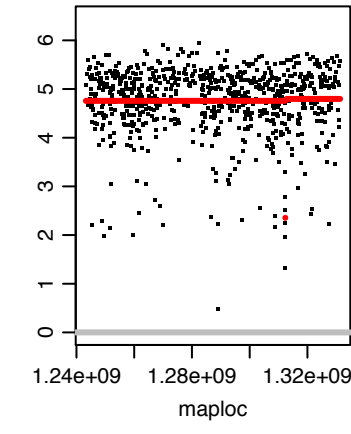

Chromosome HiC\_scaffold\_50

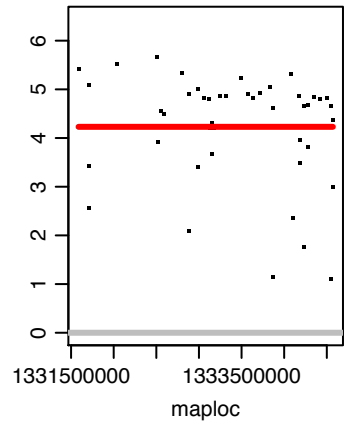

Chromosome HiC\_scaffold\_51

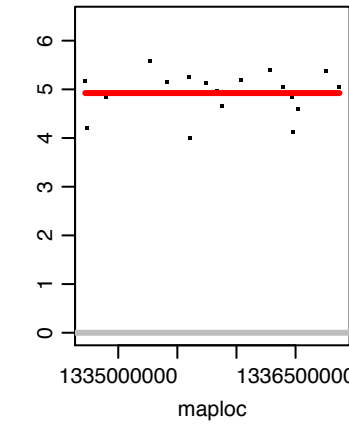

Chromosome HiC\_scaffold\_52

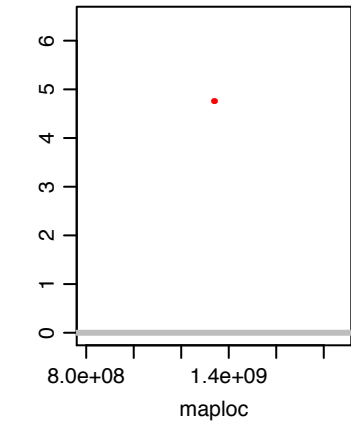

Chromosome HiC\_scaffold\_53

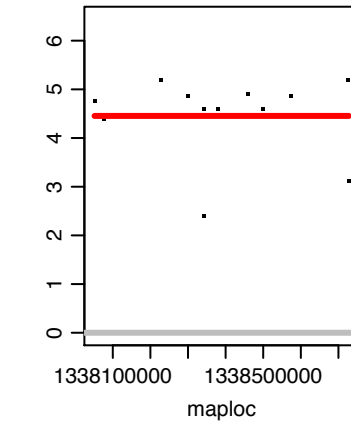

Chromosome HiC\_scaffold\_54

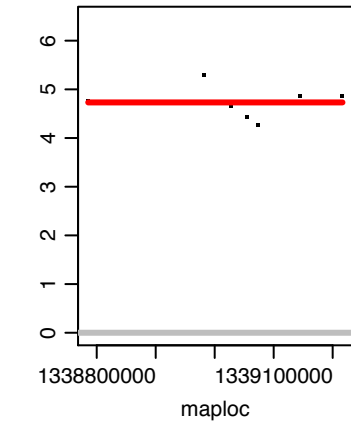

Chromosome HiC\_scaffold\_6

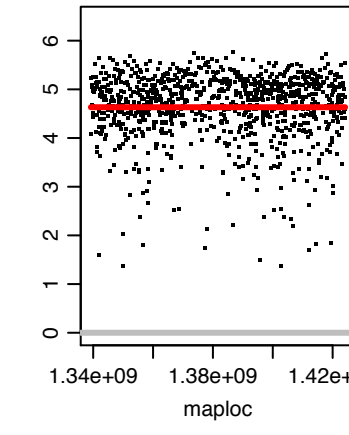

Chromosome HiC\_scaffold\_7

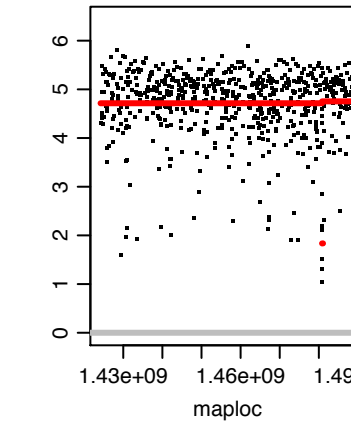

Chromosome HiC\_scaffold\_8

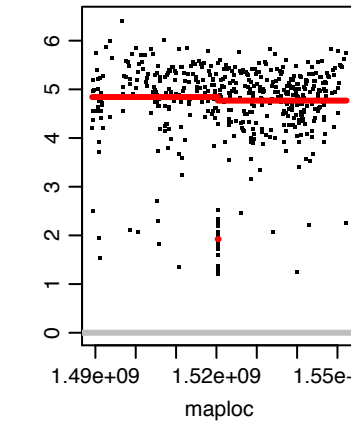

Chromosome HiC\_scaffold\_9

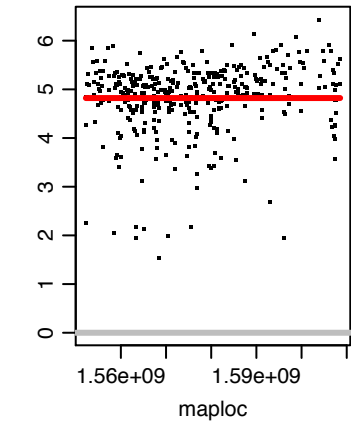

ARU\_4

Chromosome HiC\_scaffold\_1

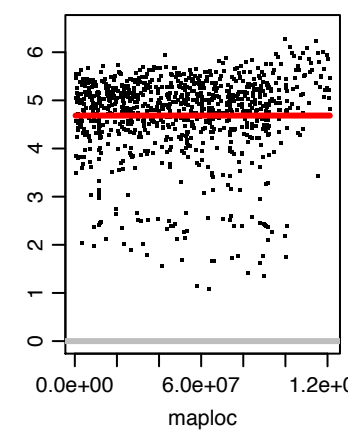

Chromosome HiC\_scaffold\_10

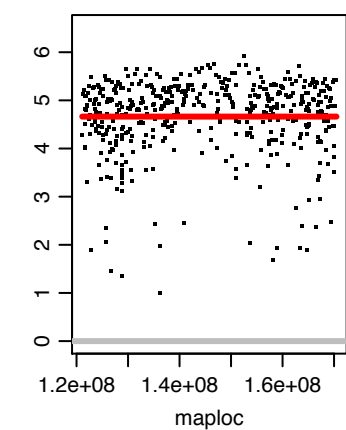

Chromosome HiC\_scaffold\_11

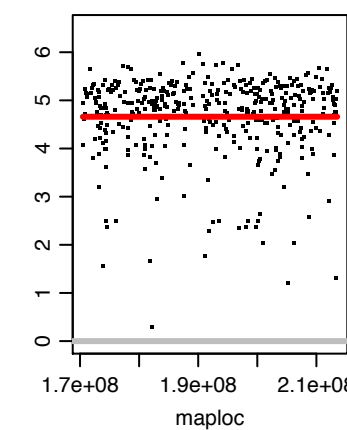

Chromosome HiC\_scaffold\_12

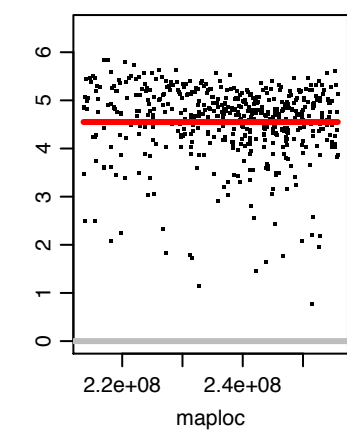

Chromosome HiC\_scaffold\_13

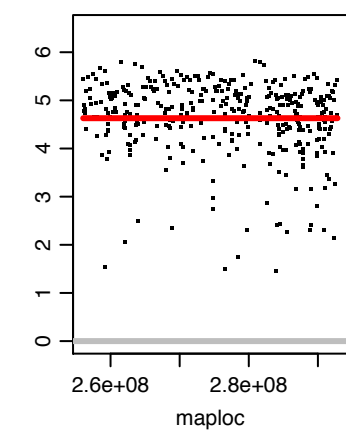

Chromosome HiC\_scaffold\_14

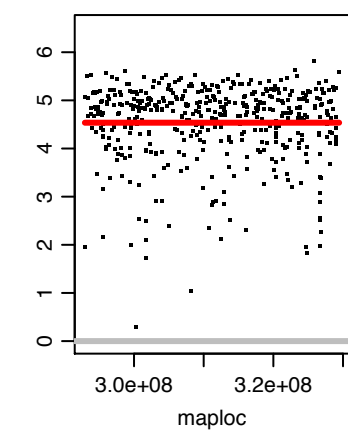

Chromosome HiC\_scaffold\_15

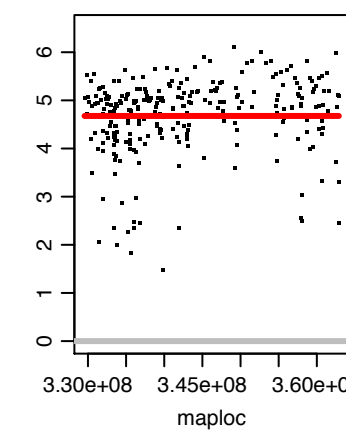

Chromosome HiC\_scaffold\_16

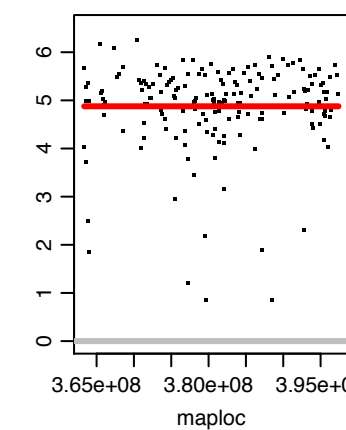

Chromosome HiC\_scaffold\_17

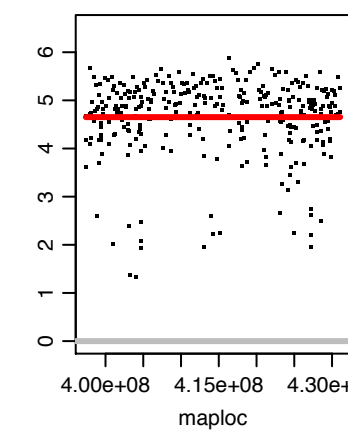

Chromosome HiC\_scaffold\_18

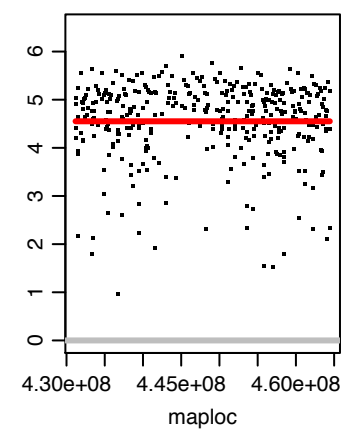

Chromosome HiC\_scaffold\_19

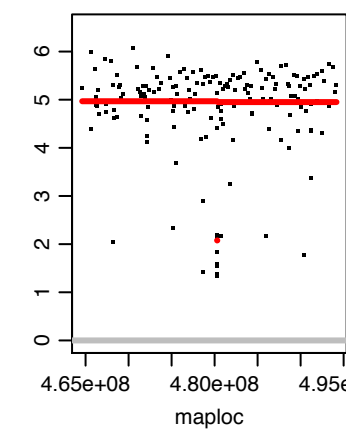

Chromosome HiC\_scaffold\_2

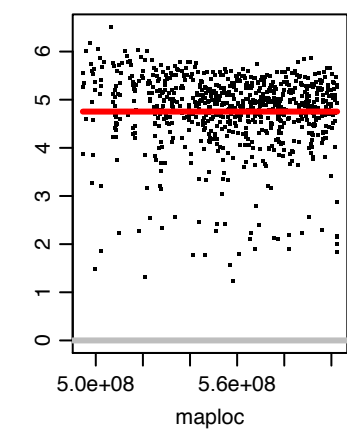

Chromosome HiC\_scaffold\_20

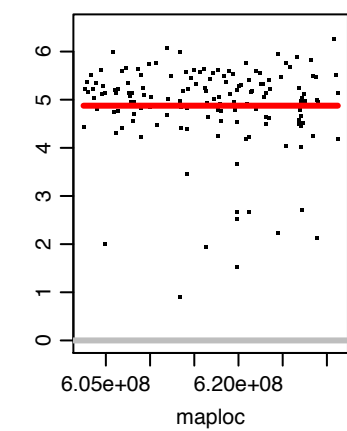

Chromosome HiC\_scaffold\_21

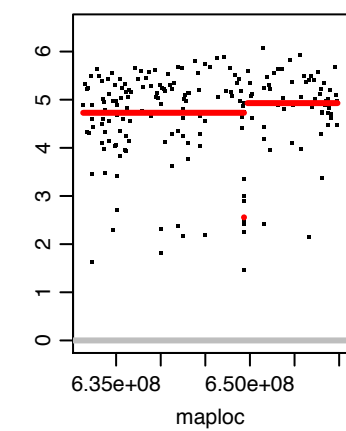

Chromosome HiC\_scaffold\_22

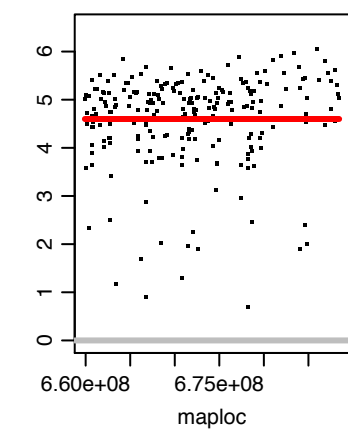

Chromosome HiC\_scaffold\_23

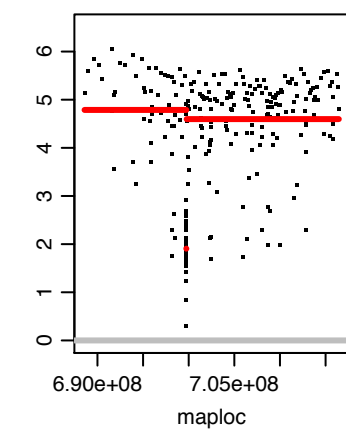

Chromosome HiC\_scaffold\_24

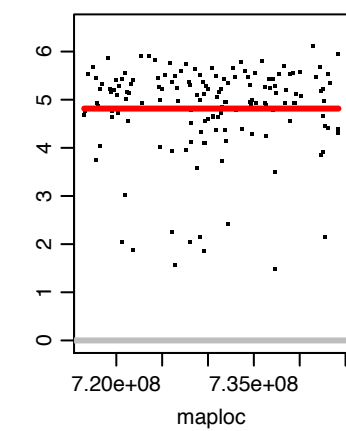

Chromosome HiC\_scaffold\_25

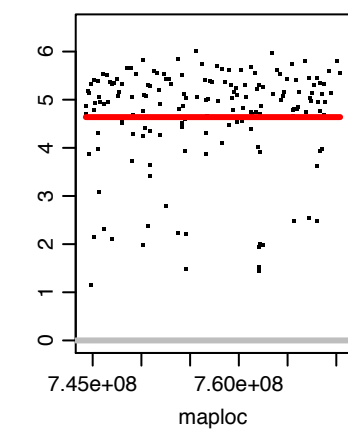

Chromosome HiC\_scaffold\_26

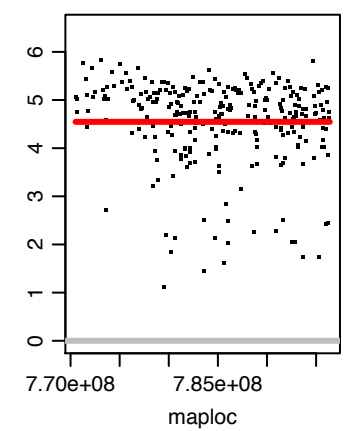

Chromosome HiC\_scaffold\_27

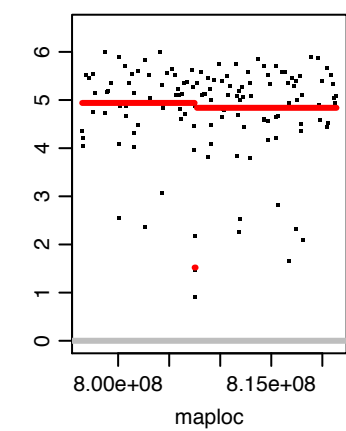

Chromosome HiC\_scaffold\_28

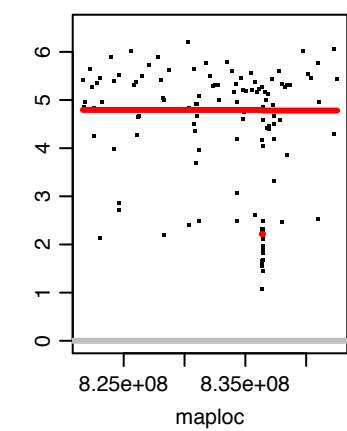

Chromosome HiC\_scaffold\_29

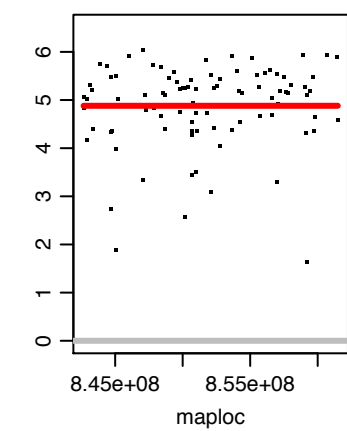

Chromosome HiC\_scaffold\_3

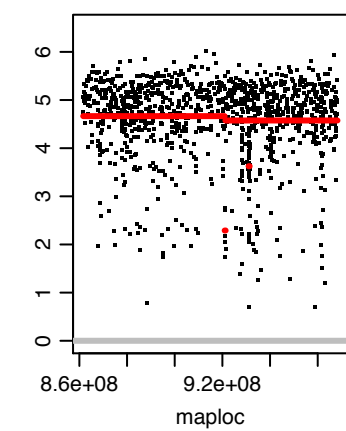

Chromosome HiC\_scaffold\_30

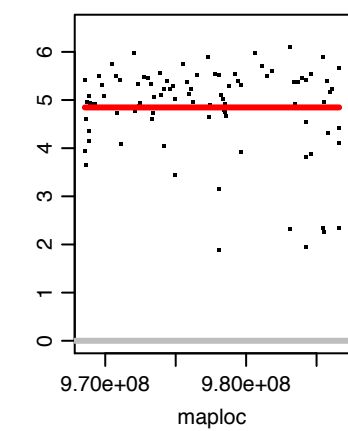

Chromosome HiC\_scaffold\_31

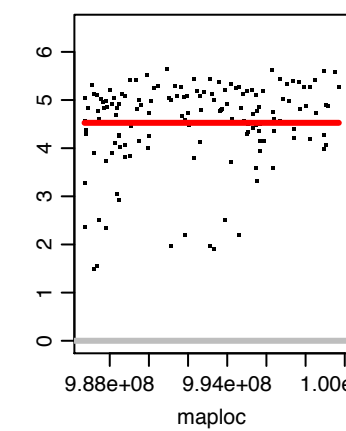

Chromosome HiC\_scaffold\_32

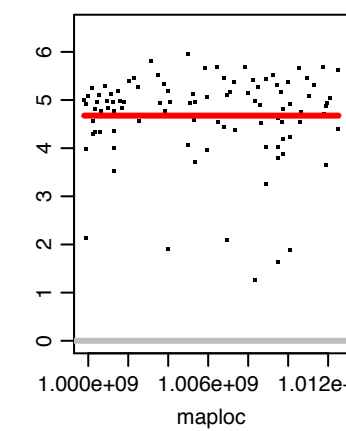

Chromosome HiC\_scaffold\_33

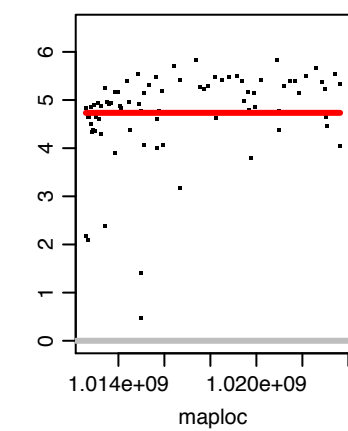

Chromosome HiC\_scaffold\_34

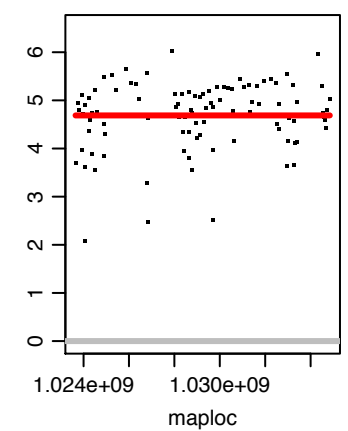

Chromosome HiC\_scaffold\_35

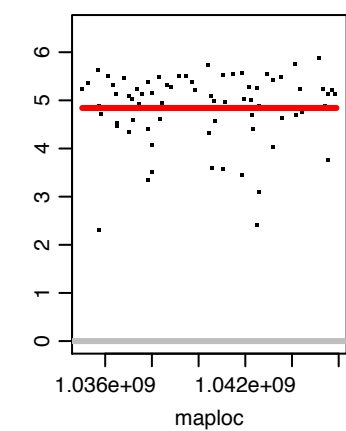

Chromosome HiC\_scaffold\_36

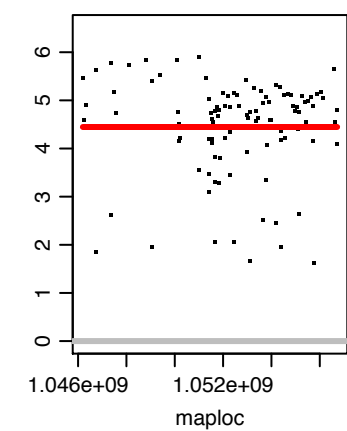

Chromosome HiC\_scaffold\_37

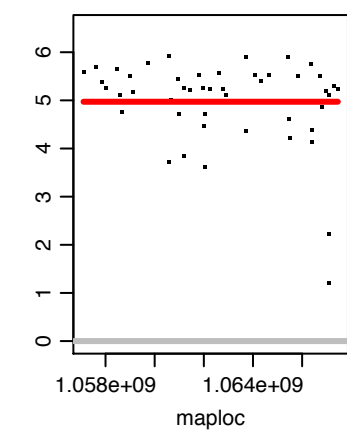

Chromosome HiC\_scaffold\_38

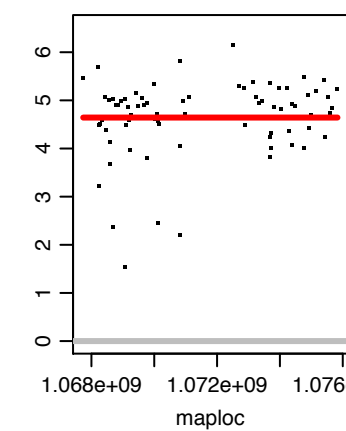

Chromosome HiC\_scaffold\_39

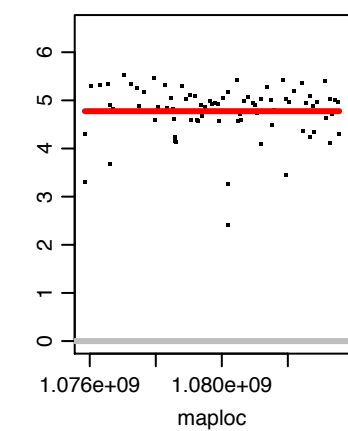

Chromosome HiC\_scaffold\_4

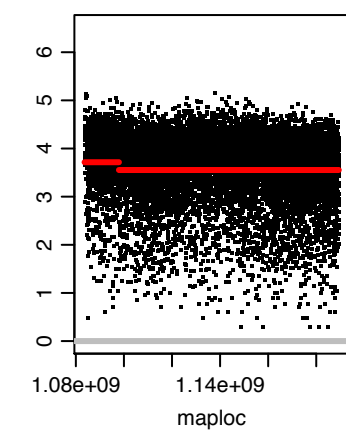

Chromosome HiC\_scaffold\_40

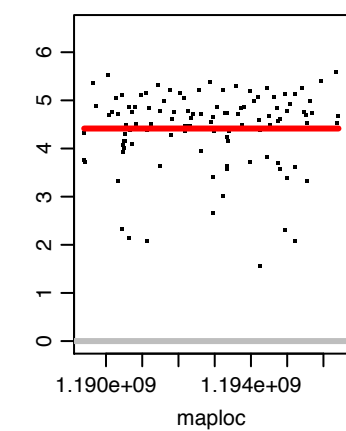

Chromosome HiC\_scaffold\_41

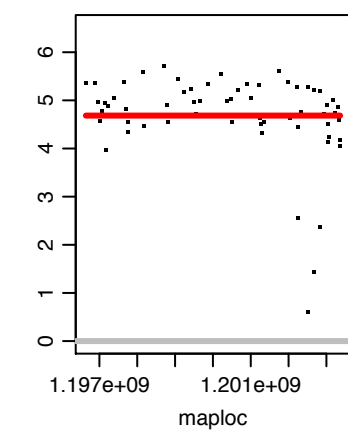

Chromosome HiC\_scaffold\_42

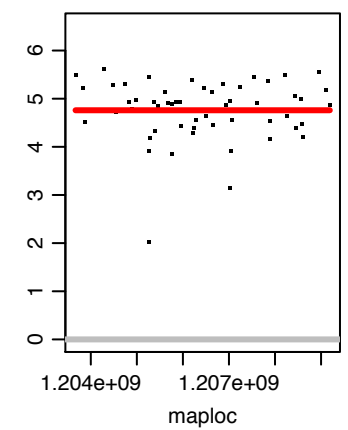

Chromosome HiC\_scaffold\_43

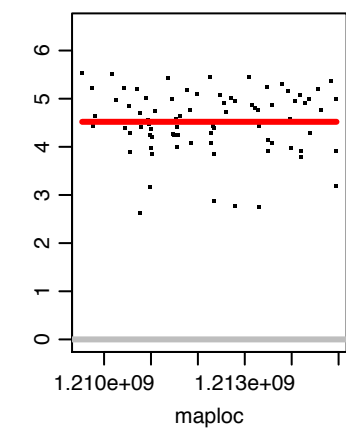

Chromosome HiC\_scaffold\_44

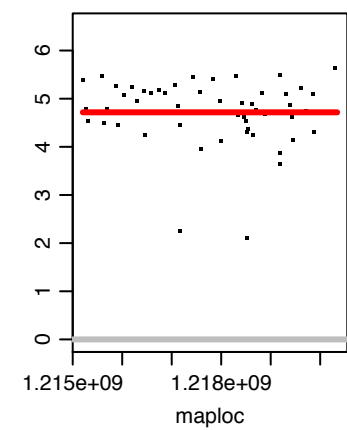

Chromosome HiC\_scaffold\_45

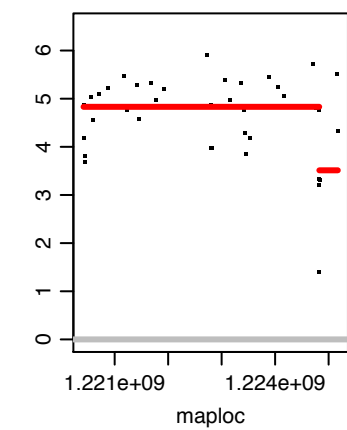

Chromosome HiC\_scaffold\_46

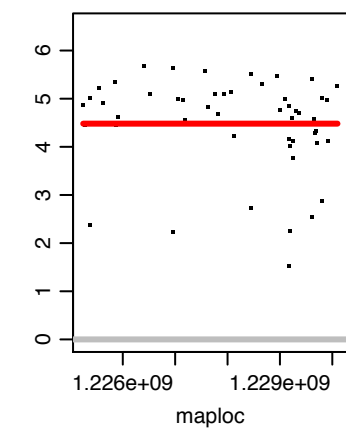

Chromosome HiC\_scaffold\_47

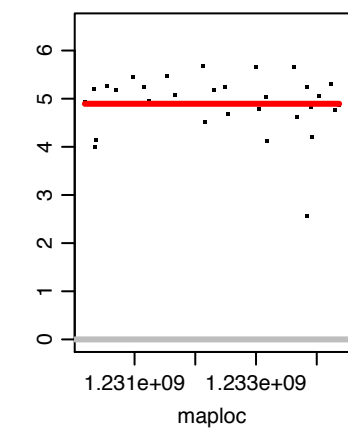

Chromosome HiC\_scaffold\_48

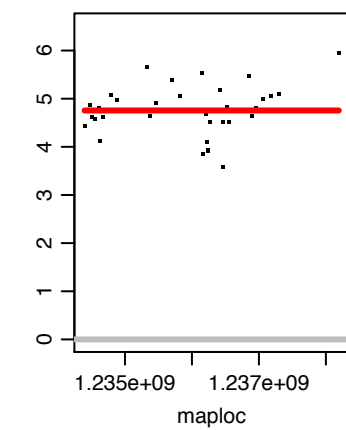

Chromosome HiC\_scaffold\_49

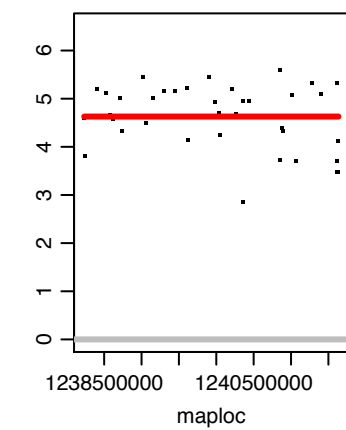

Chromosome HiC\_scaffold\_5

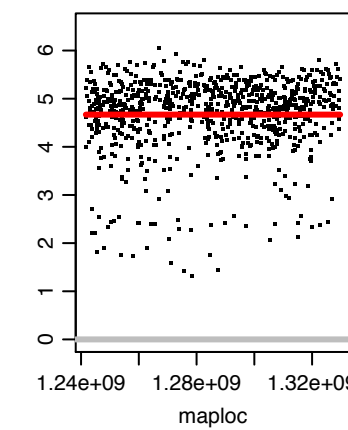

Chromosome HiC\_scaffold\_50

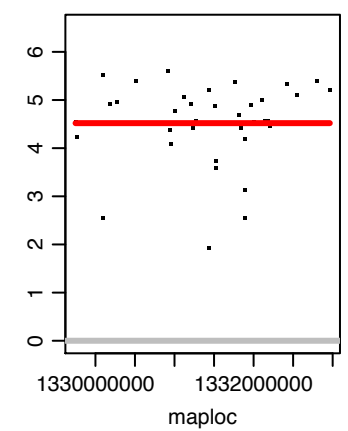

Chromosome HiC\_scaffold\_51

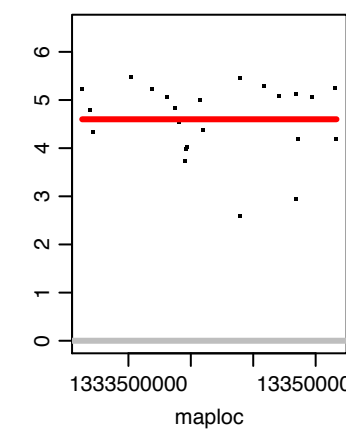

Chromosome HiC\_scaffold\_52

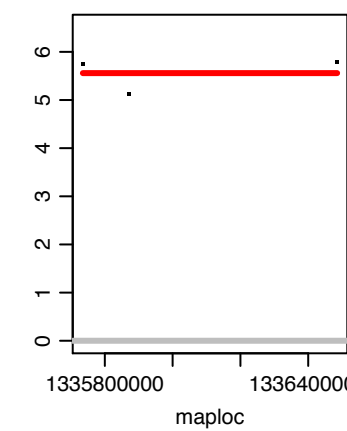

Chromosome HiC\_scaffold\_53

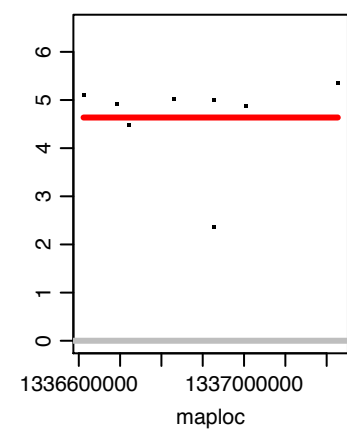

Chromosome HiC\_scaffold\_54

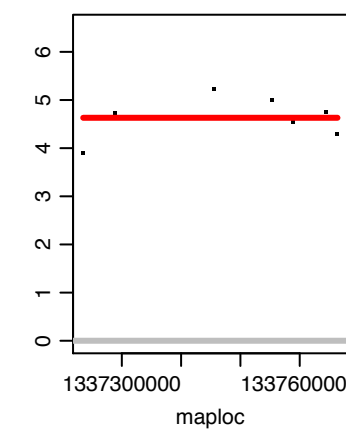

Chromosome HiC\_scaffold\_55

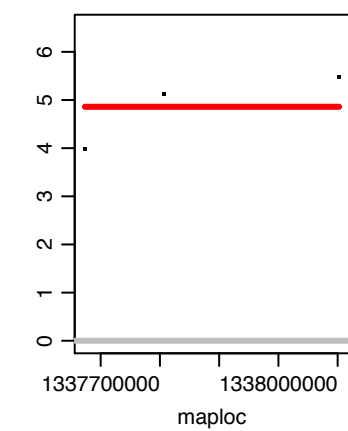

Chromosome HiC\_scaffold\_6

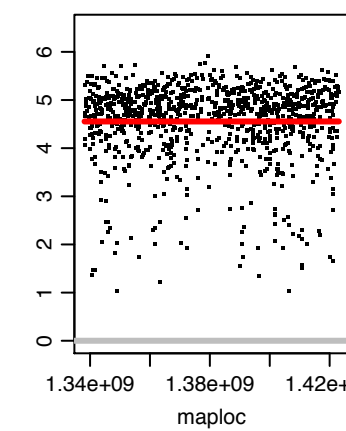

Chromosome HiC\_scaffold\_7

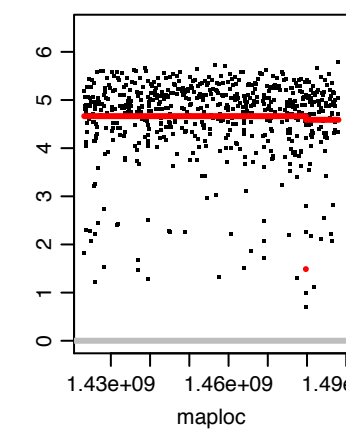

Chromosome HiC\_scaffold\_8

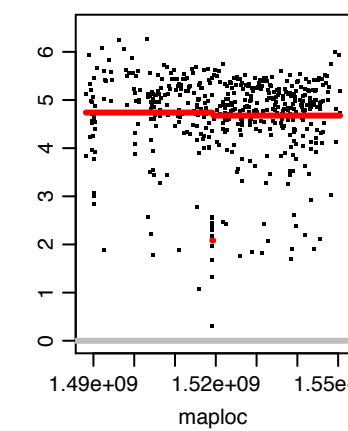

Chromosome HiC\_scaffold\_9

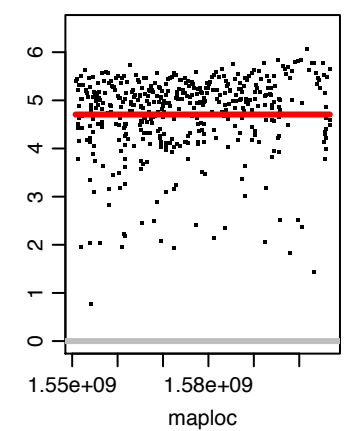

ARU\_5

Chromosome HiC\_scaffold\_1

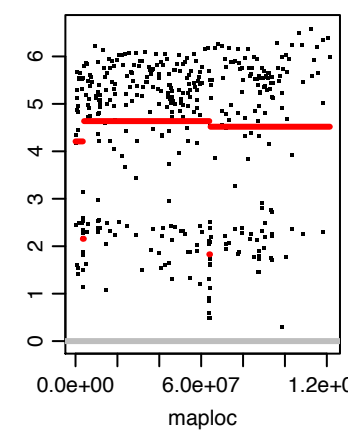

Chromosome HiC\_scaffold\_10

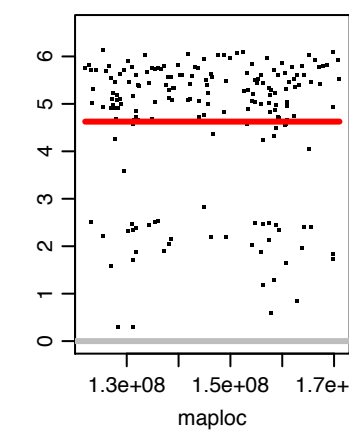

Chromosome HiC\_scaffold\_11

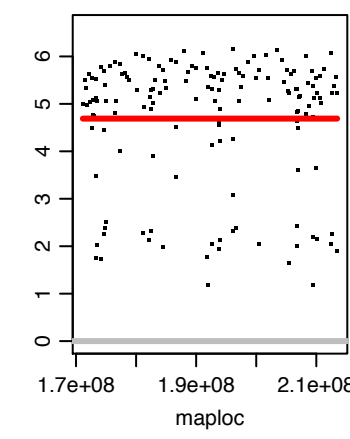

Chromosome HiC\_scaffold\_12

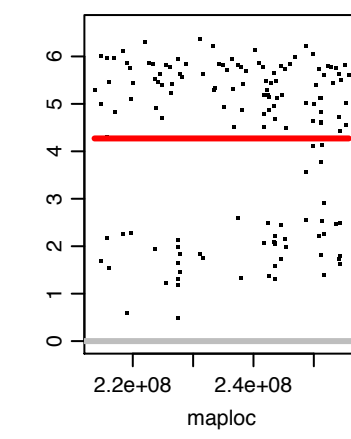

Chromosome HiC\_scaffold\_13

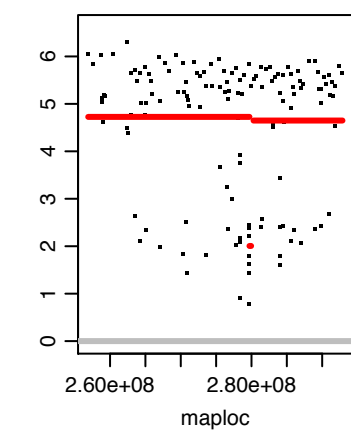

Chromosome HiC\_scaffold\_14

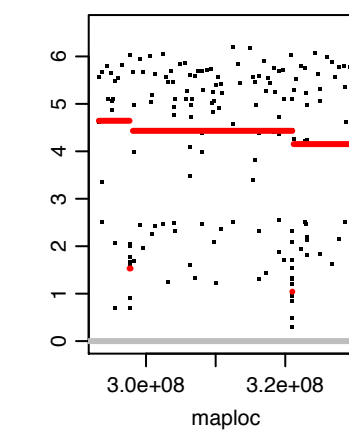

Chromosome HiC\_scaffold\_15

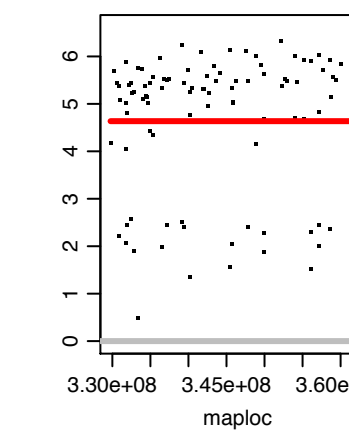

Chromosome HiC\_scaffold\_16

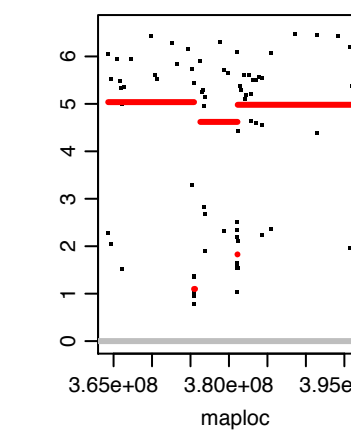

Chromosome HiC\_scaffold\_17

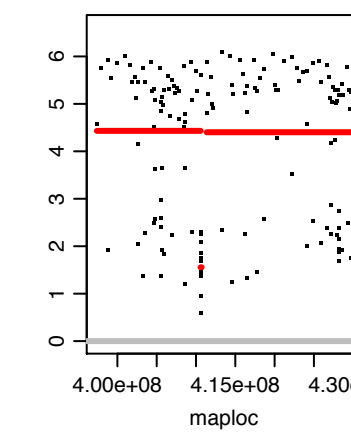

Chromosome HiC\_scaffold\_18

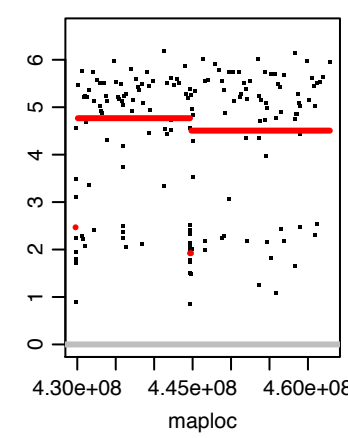

Chromosome HiC\_scaffold\_19

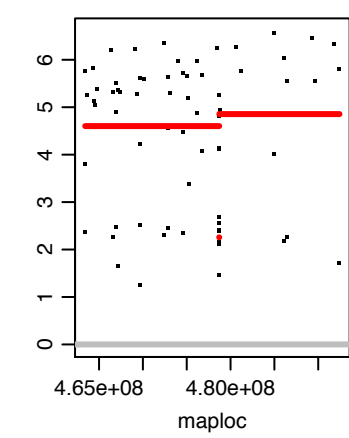

Chromosome HiC\_scaffold\_2

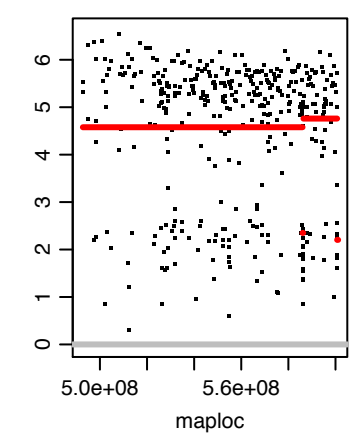

Chromosome HiC\_scaffold\_20

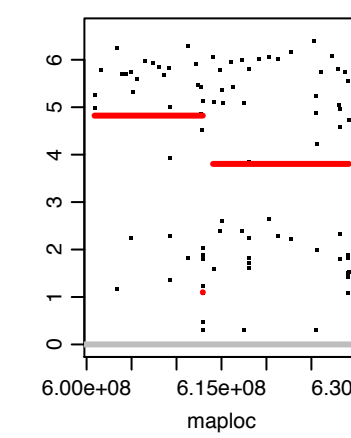

Chromosome HiC\_scaffold\_21

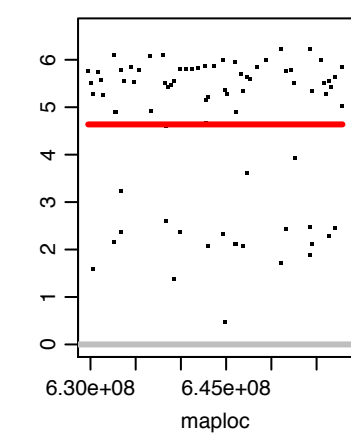

Chromosome HiC\_scaffold\_22

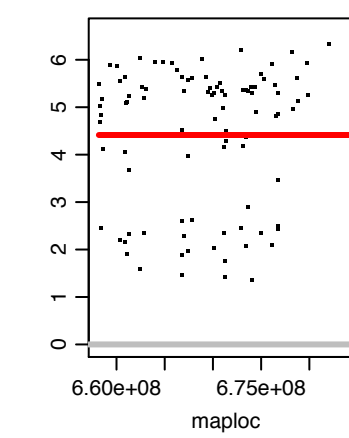

Chromosome HiC\_scaffold\_23

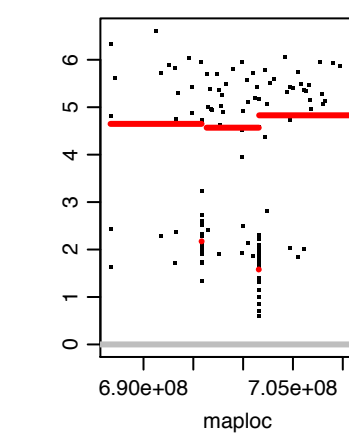

Chromosome HiC\_scaffold\_24

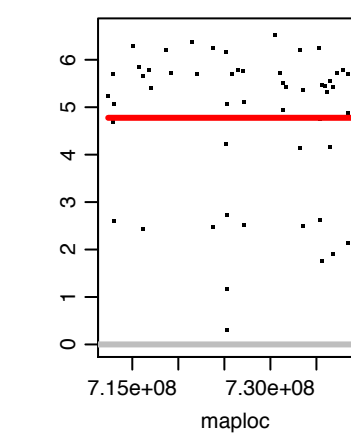

Chromosome HiC\_scaffold\_25

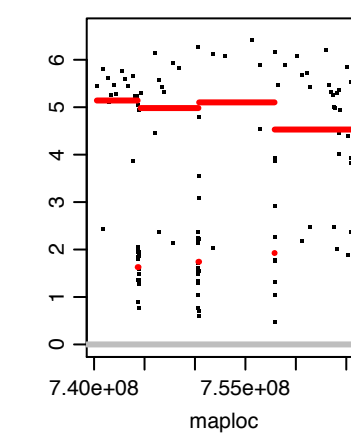

Chromosome HiC\_scaffold\_26

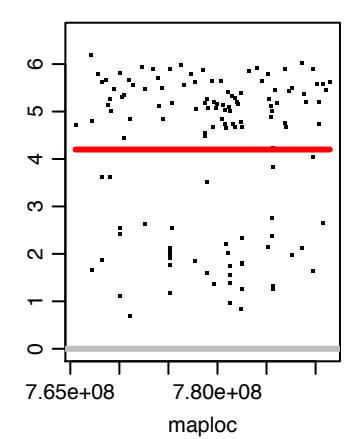

Chromosome HiC\_scaffold\_27

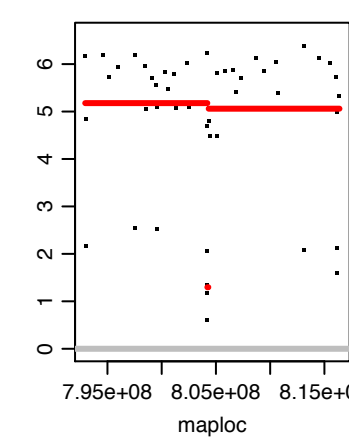

Chromosome HiC\_scaffold\_28

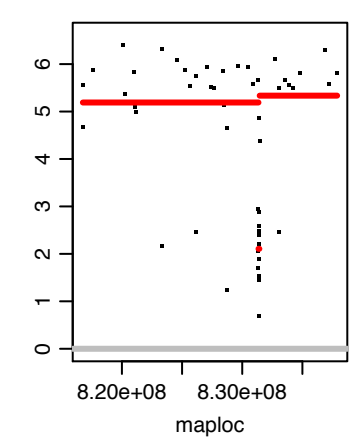

Chromosome HiC\_scaffold\_29

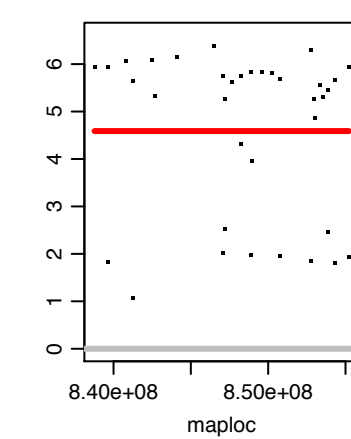

Chromosome HiC\_scaffold\_3

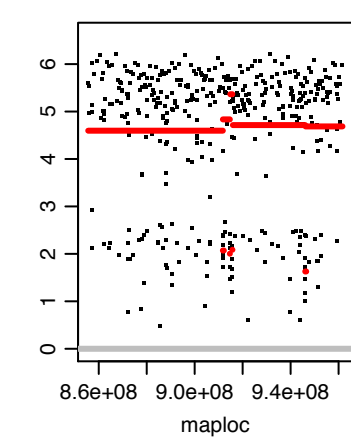

Chromosome HiC\_scaffold\_30

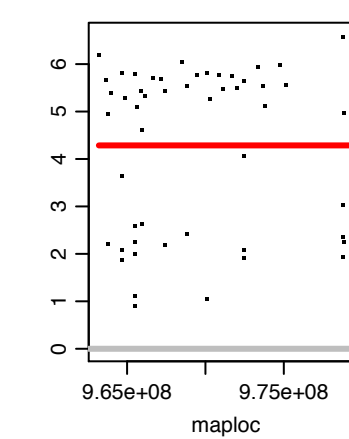

Chromosome HiC\_scaffold\_31

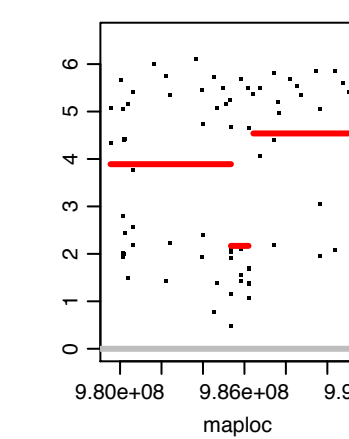

Chromosome HiC\_scaffold\_32

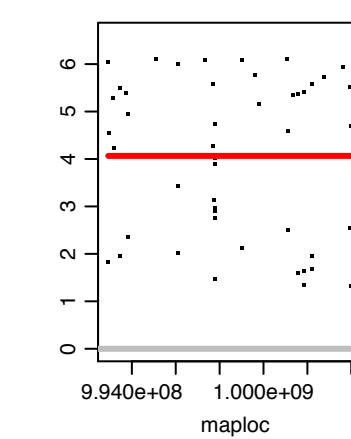

Chromosome HiC\_scaffold\_33

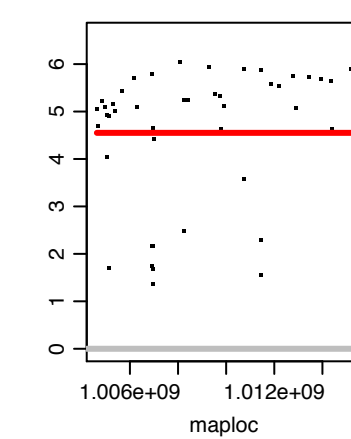

Chromosome HiC\_scaffold\_34

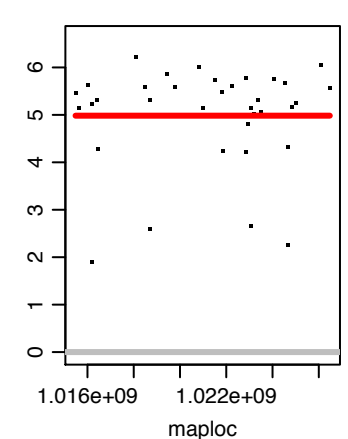

Chromosome HiC\_scaffold\_35

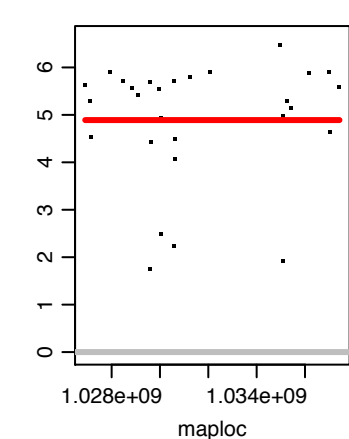

Chromosome HiC\_scaffold\_36

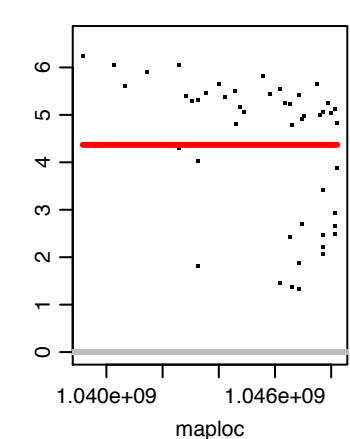

Chromosome HiC\_scaffold\_37

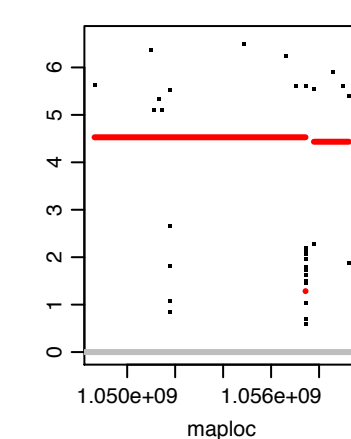

Chromosome HiC\_scaffold\_38

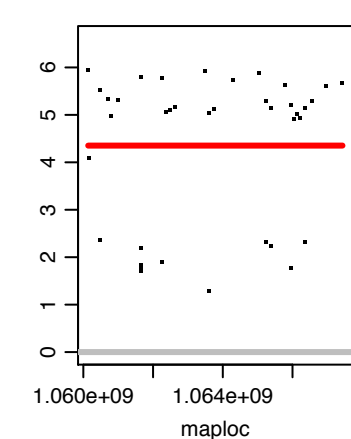

Chromosome HiC\_scaffold\_39

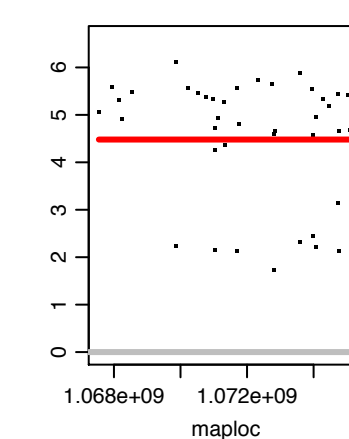

Chromosome HiC\_scaffold\_4

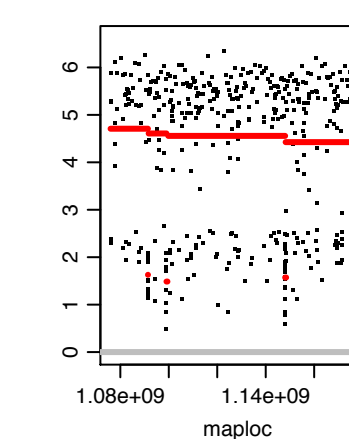

Chromosome HiC\_scaffold\_40

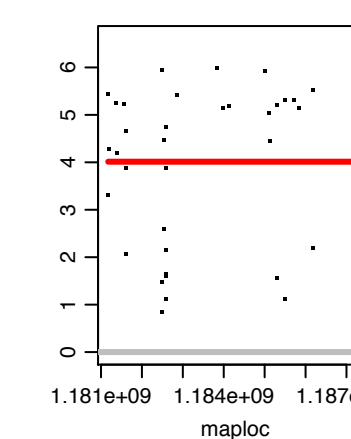

Chromosome HiC\_scaffold\_41

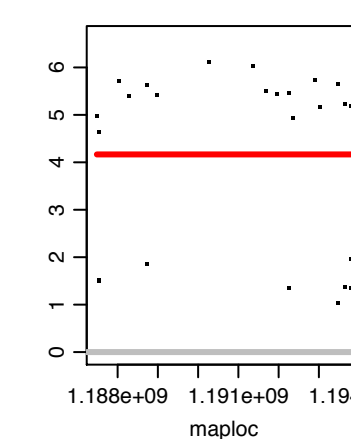

Chromosome HiC\_scaffold\_42

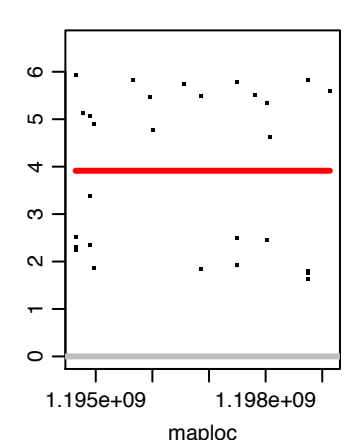

Chromosome HiC\_scaffold\_43

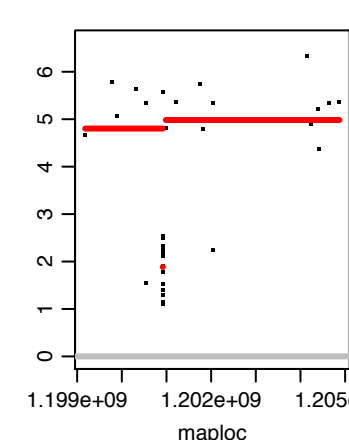

Chromosome HiC\_scaffold\_44

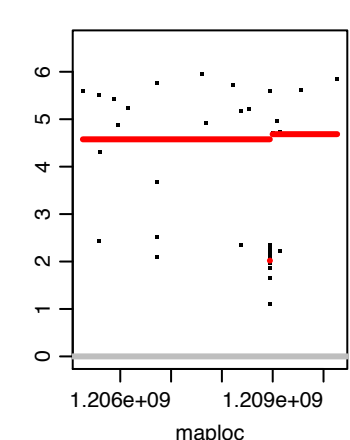

Chromosome HiC\_scaffold\_45

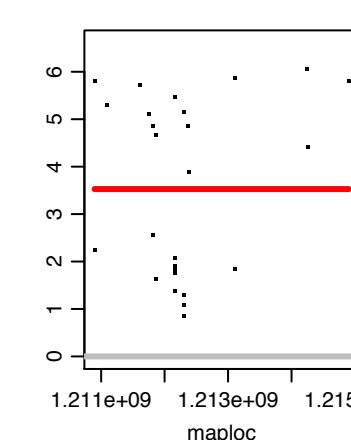

Chromosome HiC\_scaffold\_46

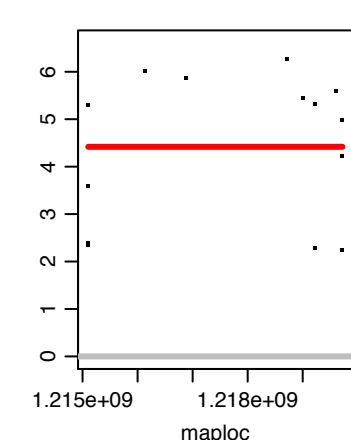

Chromosome HiC\_scaffold\_47

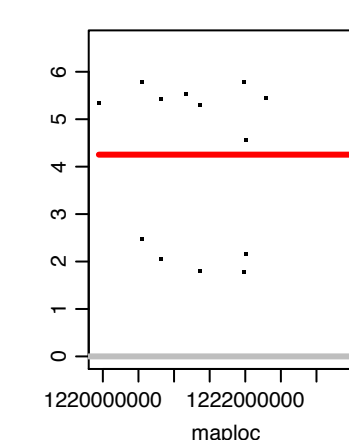

Chromosome HiC\_scaffold\_48

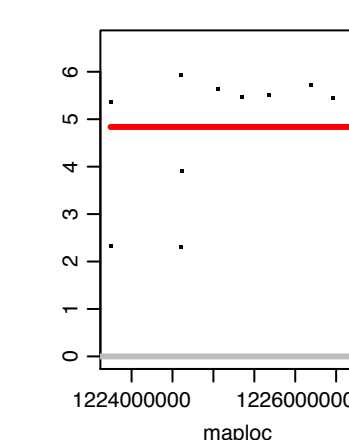

Chromosome HiC\_scaffold\_49

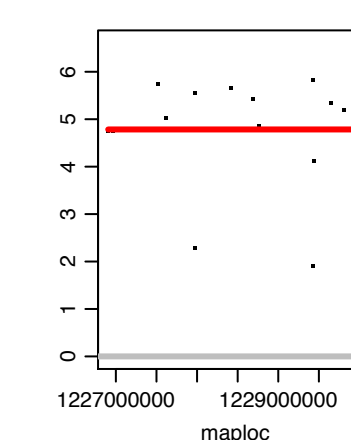

Chromosome HiC\_scaffold\_5

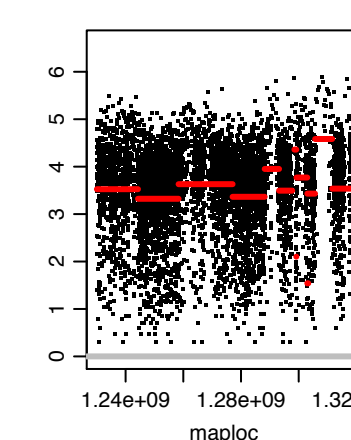

Chromosome HiC\_scaffold\_50

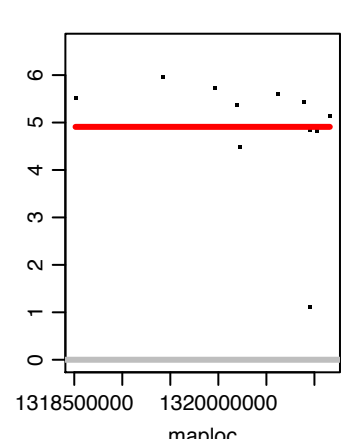

Chromosome HiC\_scaffold\_51

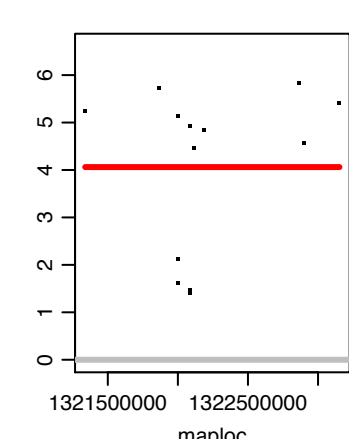

Chromosome HiC\_scaffold\_52

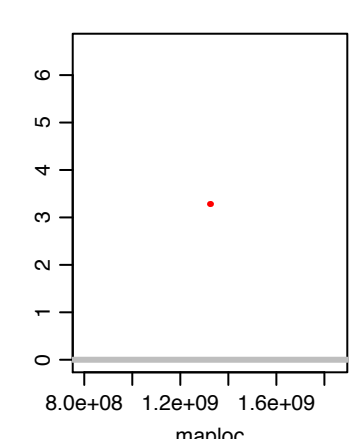

Chromosome HiC\_scaffold\_53

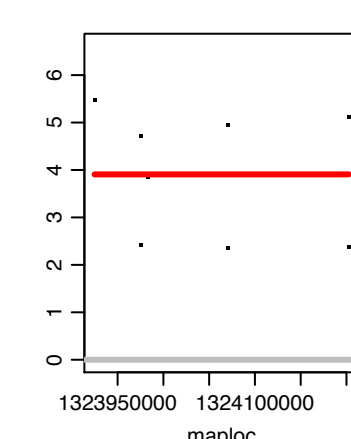

Chromosome HiC\_scaffold\_54

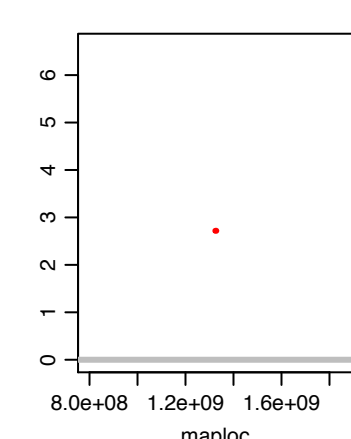

Chromosome HiC\_scaffold\_6

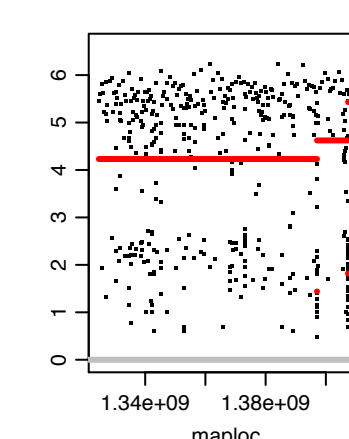

Chromosome HiC\_scaffold\_7

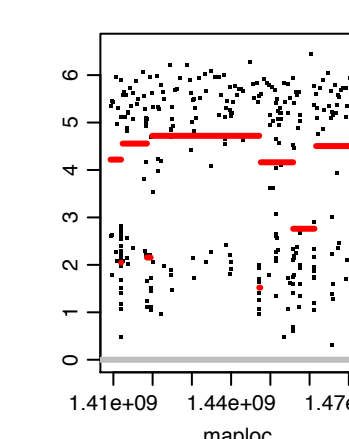

Chromosome HiC\_scaffold\_8

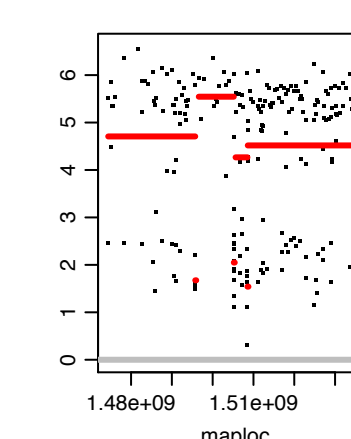

Chromosome HiC\_scaffold\_9

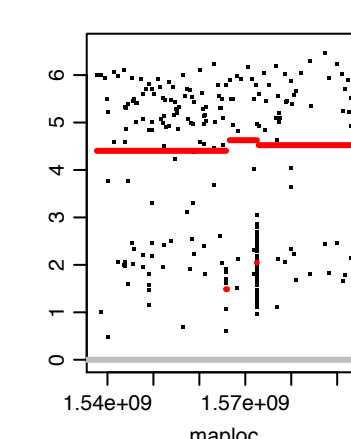



ARU\_7.reg

Chromosome HiC\_scaffold\_1

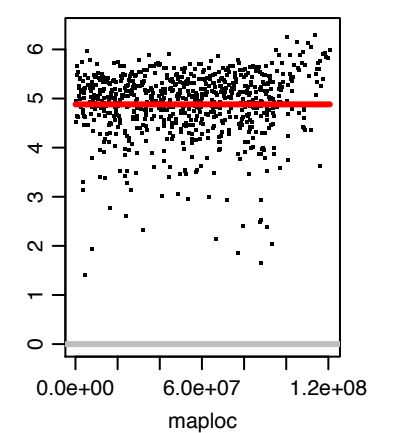

Chromosome HiC\_scaffold\_10

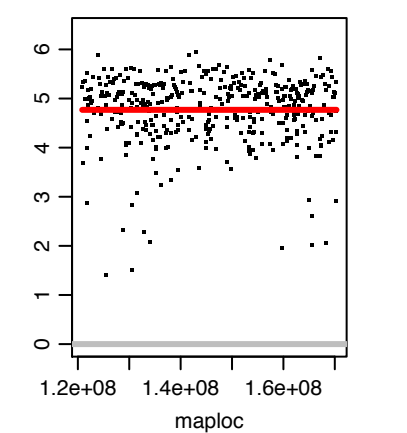

Chromosome HiC\_scaffold\_11

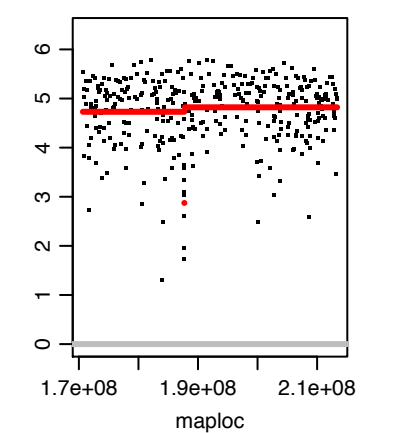

Chromosome HiC\_scaffold\_12

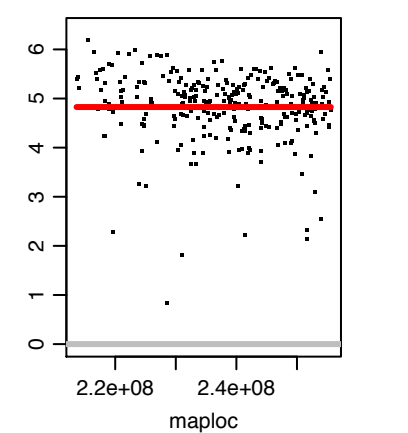

Chromosome HiC\_scaffold\_13

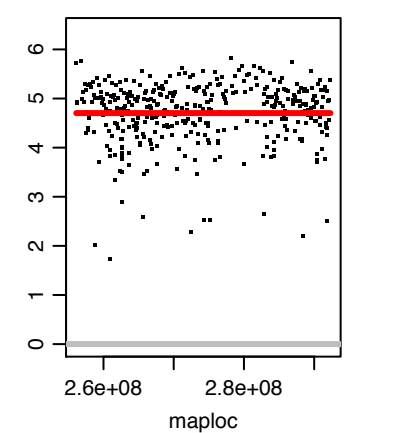

Chromosome HiC\_scaffold\_14

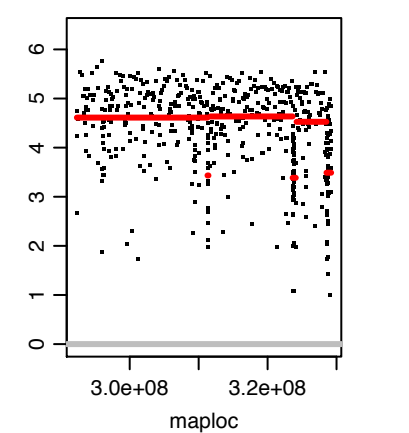

Chromosome HiC\_scaffold\_15

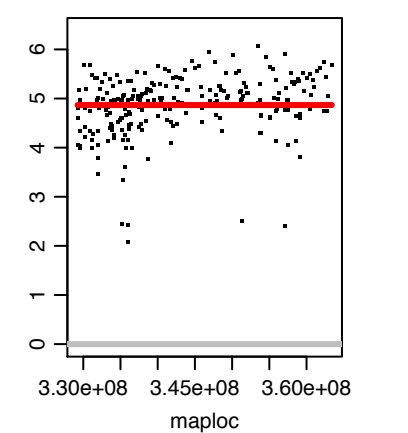

Chromosome HiC\_scaffold\_16

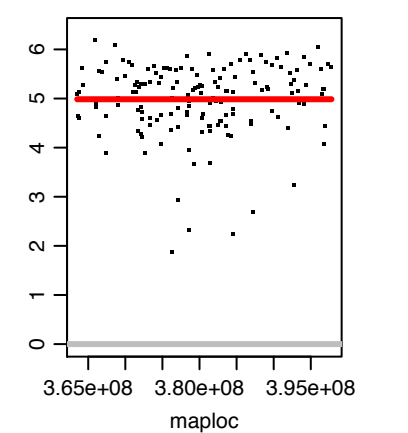

Chromosome HiC\_scaffold\_17

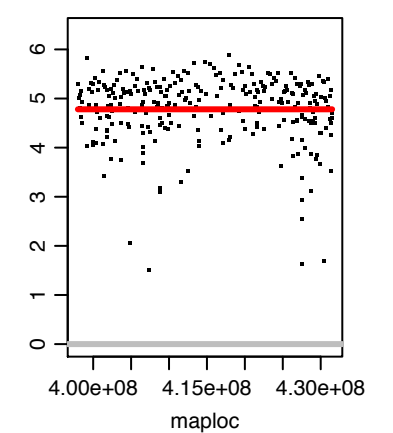

Chromosome HiC\_scaffold\_18

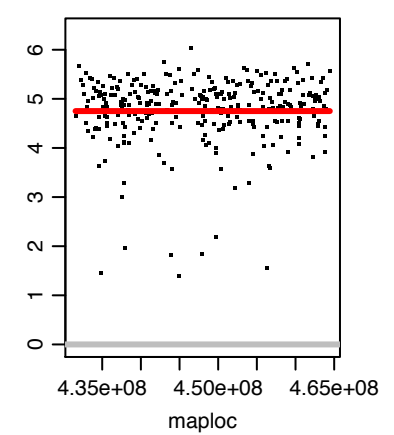

Chromosome HiC\_scaffold\_19

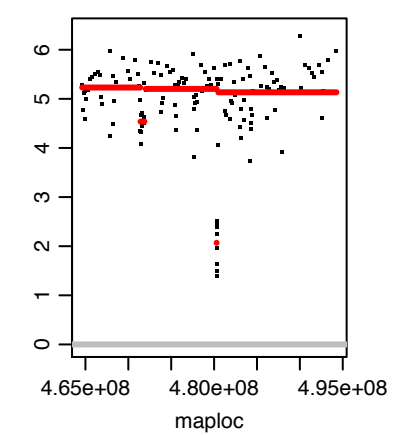

Chromosome HiC\_scaffold\_2

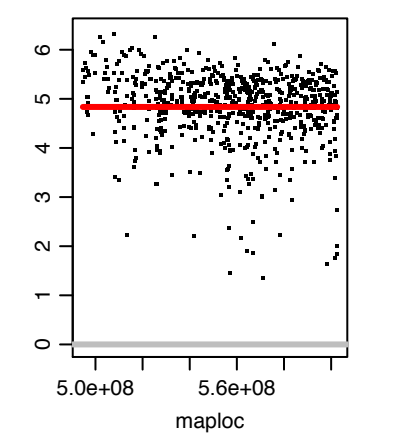

Chromosome HiC\_scaffold\_20

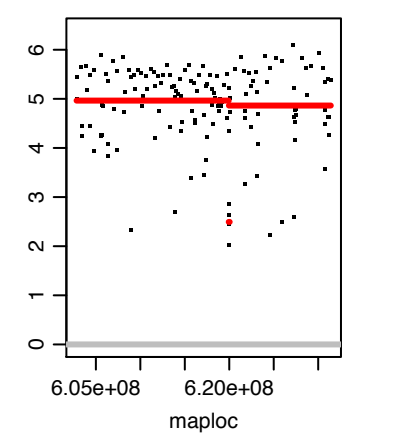

Chromosome HiC\_scaffold\_21

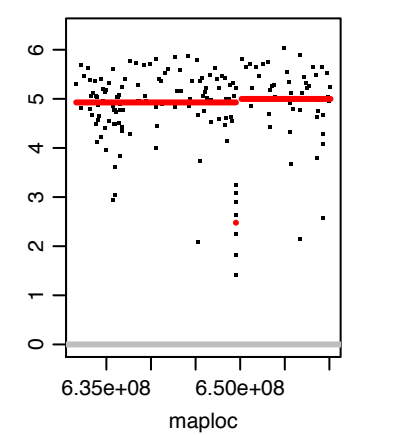

Chromosome HiC\_scaffold\_22

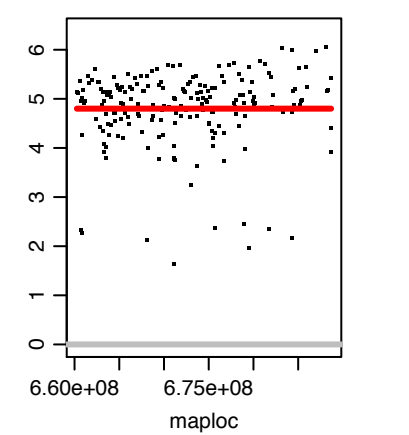

Chromosome HiC\_scaffold\_23

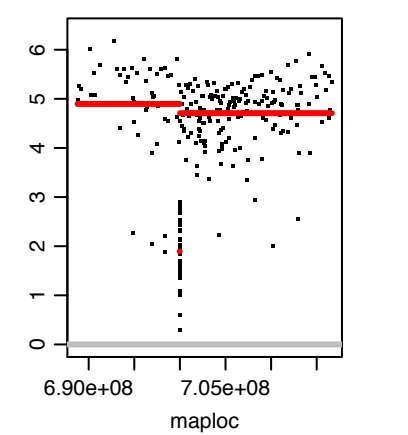

Chromosome HiC\_scaffold\_24

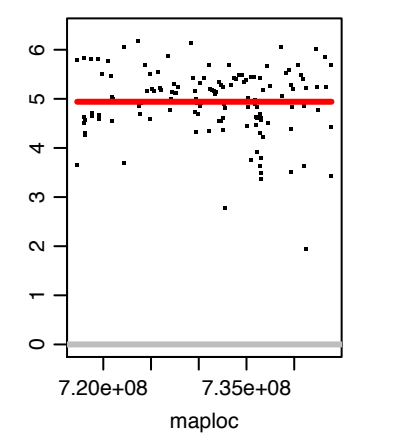

Chromosome HiC\_scaffold\_25

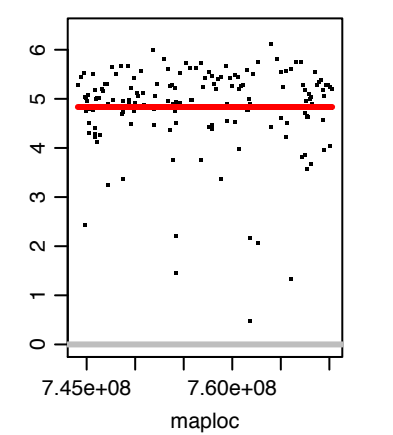

Chromosome HiC\_scaffold\_26

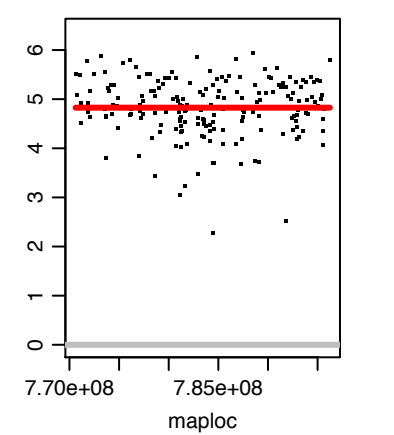

Chromosome HiC\_scaffold\_27

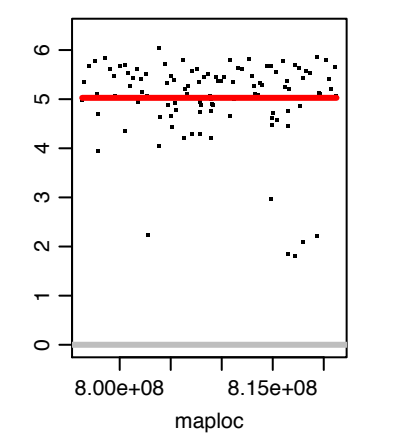

Chromosome HiC\_scaffold\_28

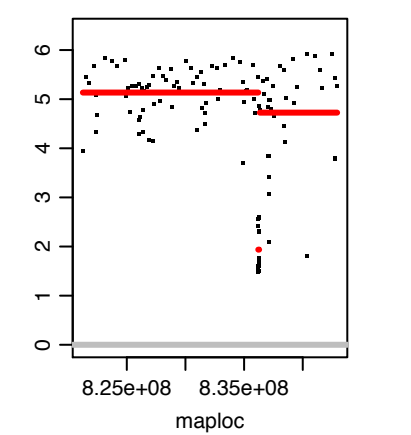

Chromosome HiC\_scaffold\_29

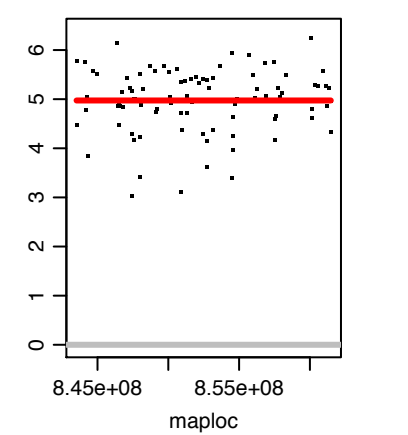

Chromosome HiC\_scaffold\_3

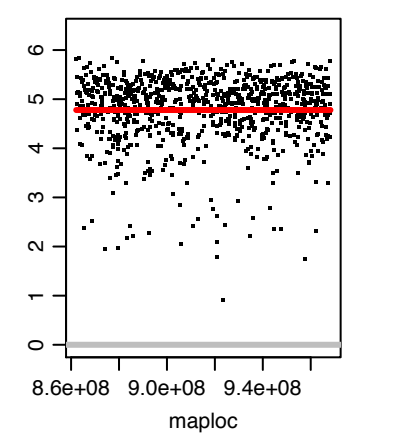

Chromosome HiC\_scaffold\_30

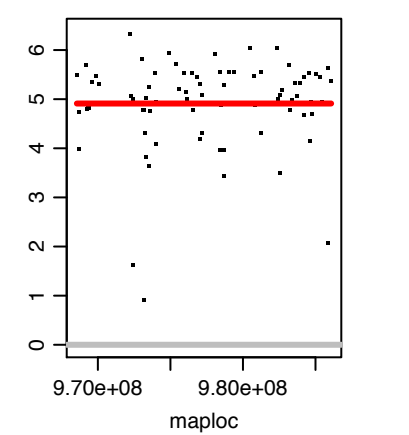

Chromosome HiC\_scaffold\_31

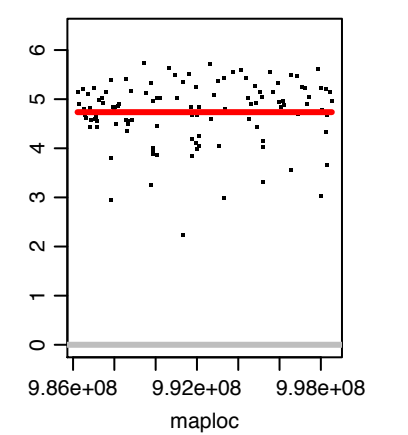

Chromosome HiC\_scaffold\_32

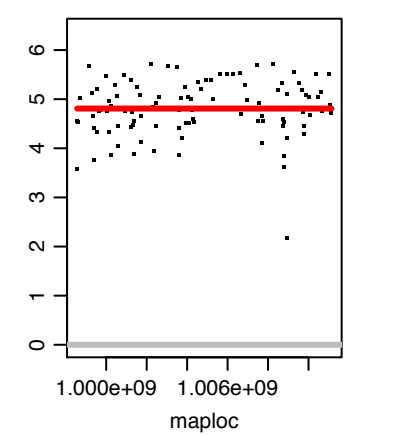

Chromosome HiC\_scaffold\_33

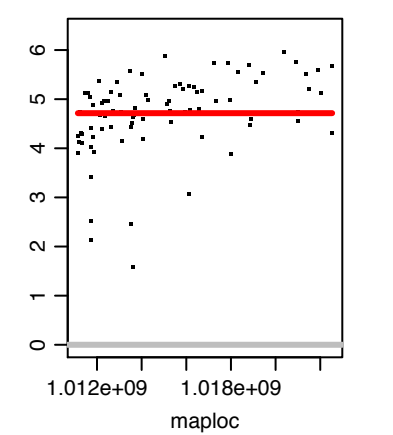

Chromosome HiC\_scaffold\_34

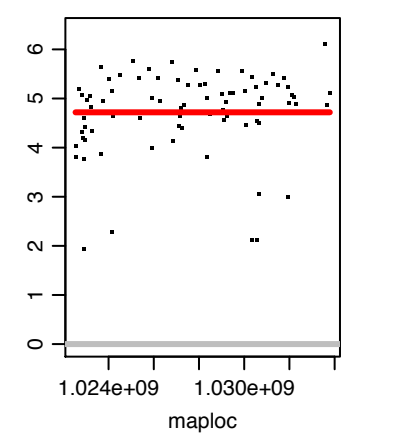

Chromosome HiC\_scaffold\_35

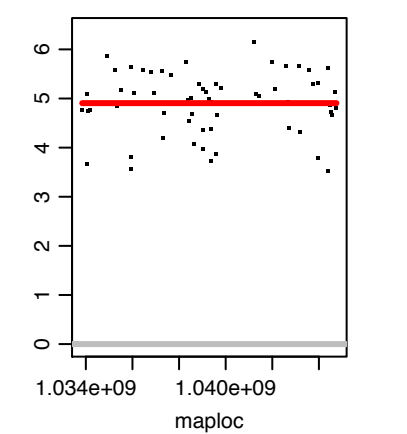

Chromosome HiC\_scaffold\_36

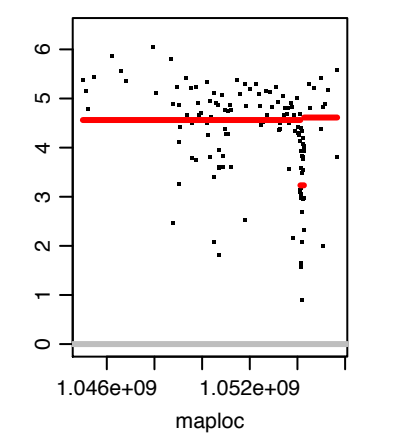

Chromosome HiC\_scaffold\_37

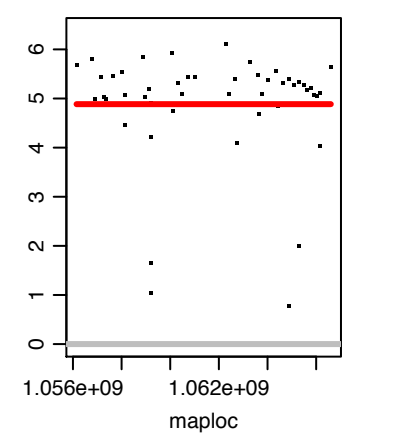

Chromosome HiC\_scaffold\_38

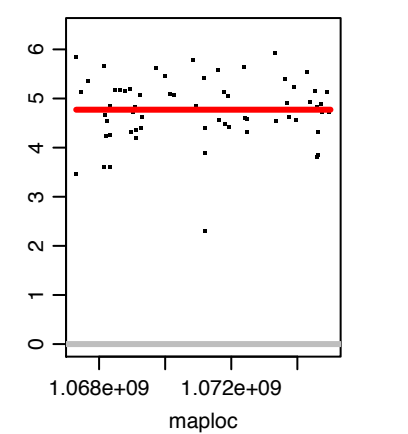

Chromosome HiC\_scaffold\_39

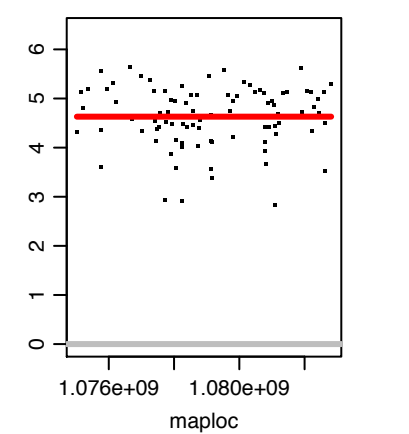

Chromosome HiC\_scaffold\_4

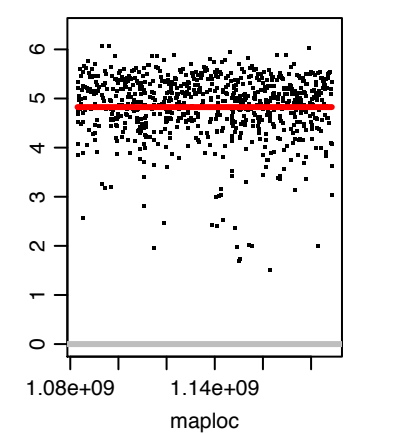

Chromosome HiC\_scaffold\_40

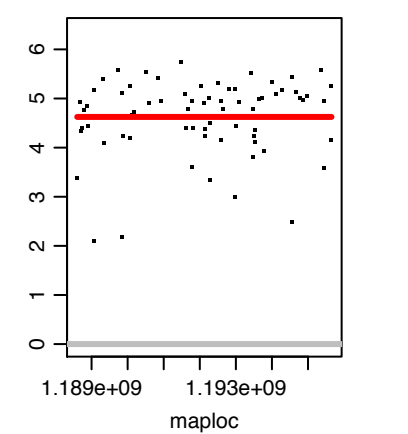

Chromosome HiC\_scaffold\_41

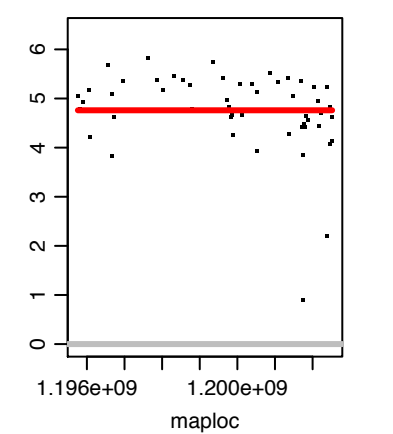

Chromosome HiC\_scaffold\_42

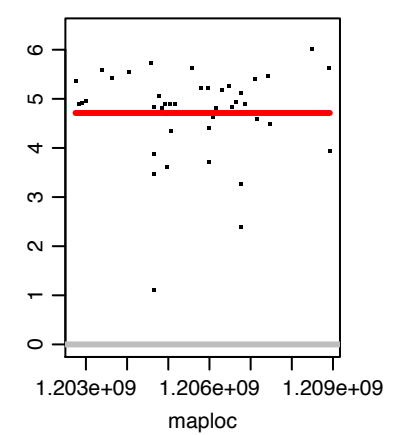

Chromosome HiC\_scaffold\_43

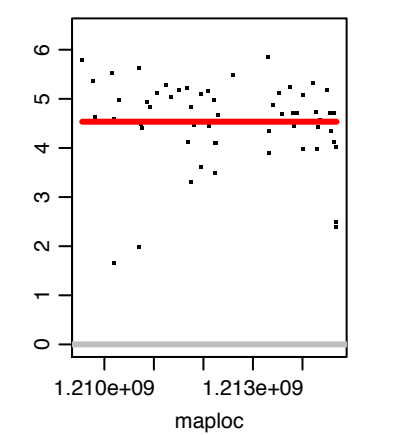

Chromosome HiC\_scaffold\_44

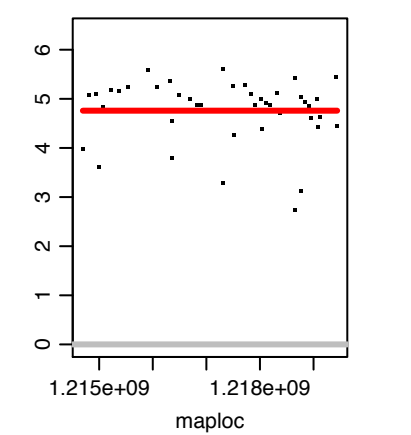

Chromosome HiC\_scaffold\_45

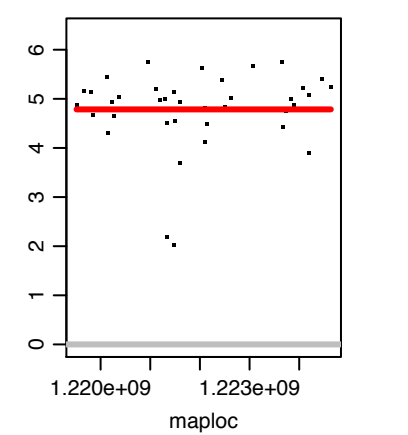

Chromosome HiC\_scaffold\_46

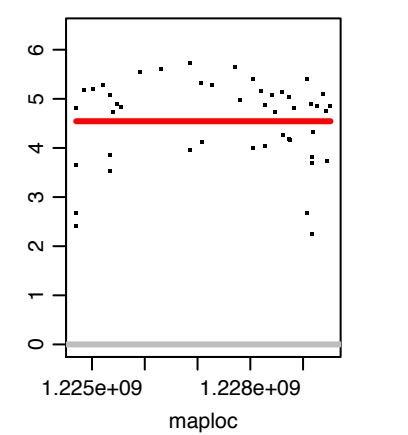

Chromosome HiC\_scaffold\_47

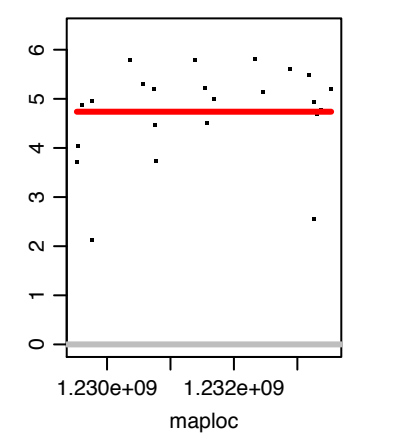

Chromosome HiC\_scaffold\_48

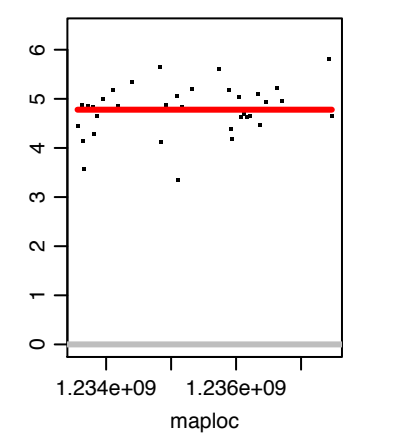

Chromosome HiC\_scaffold\_49

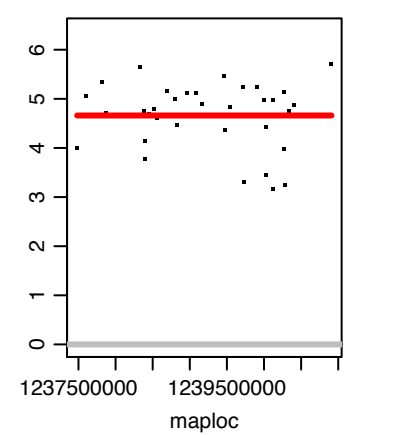

Chromosome HiC\_scaffold\_5

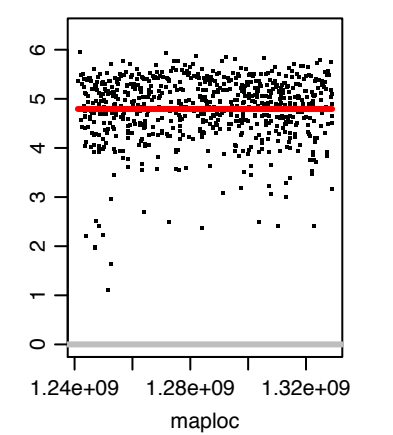

Chromosome HiC\_scaffold\_50

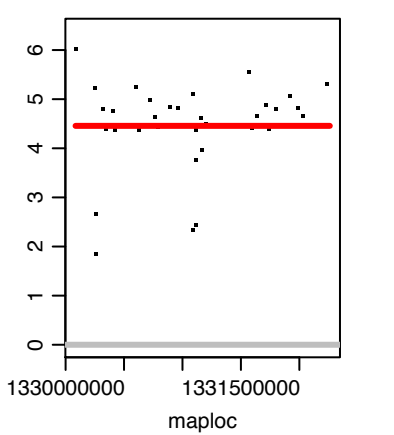

Chromosome HiC\_scaffold\_51

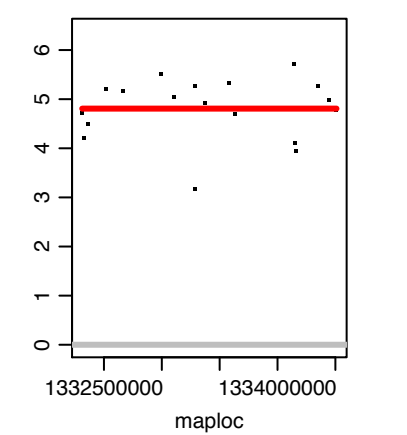

Chromosome HiC\_scaffold\_52

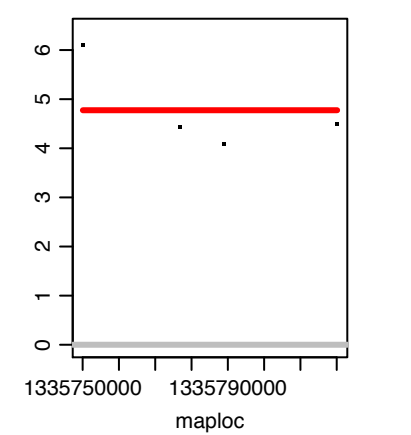

Chromosome HiC\_scaffold\_53

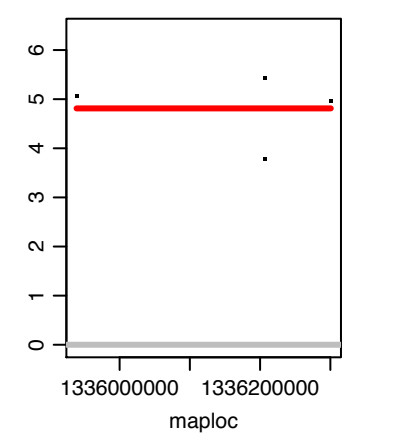

Chromosome HiC\_scaffold\_54

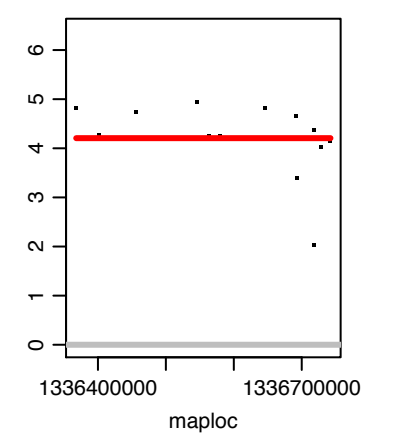

Chromosome HiC\_scaffold\_55

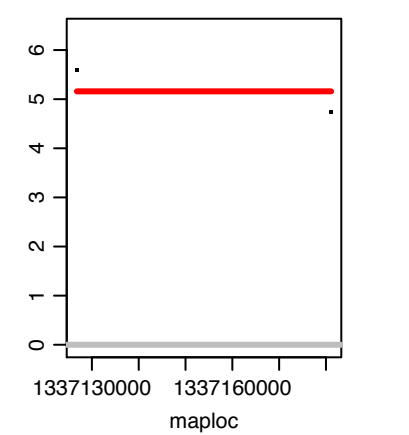

Chromosome HiC\_scaffold\_6

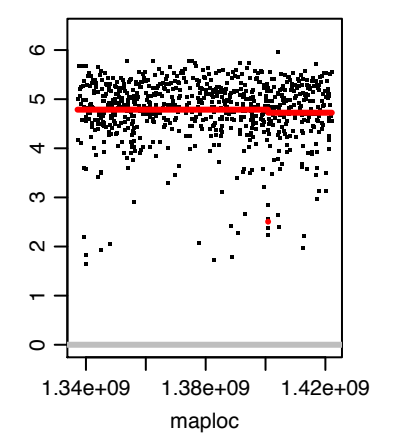

Chromosome HiC\_scaffold\_7

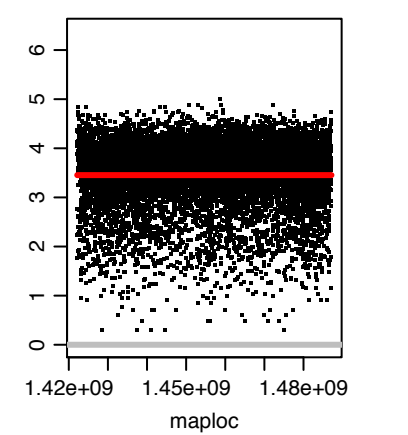

Chromosome HiC\_scaffold\_8

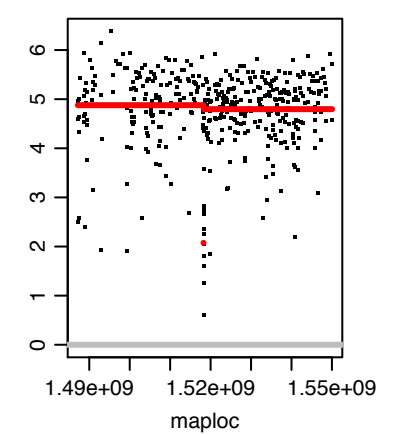

Chromosome HiC\_scaffold\_9

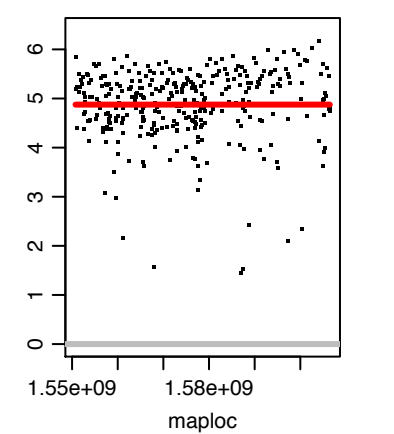

## ARU\_8q.reg

Chromosome HiC\_scaffold\_1

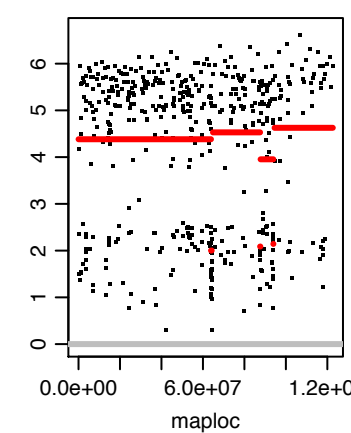

Chromosome HiC\_scaffold\_10

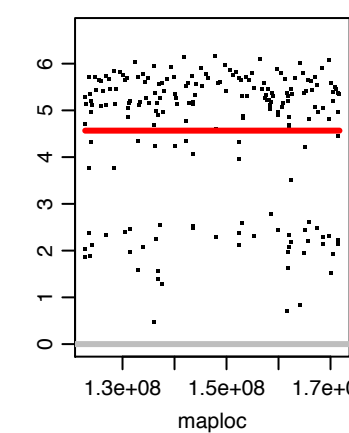

Chromosome HiC\_scaffold\_11

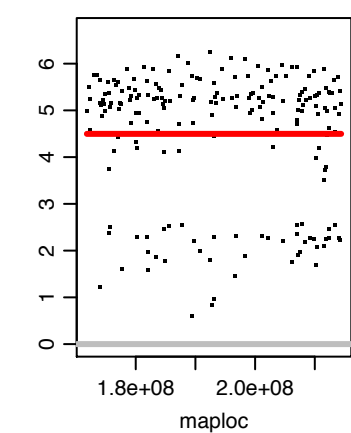

Chromosome HiC\_scaffold\_12

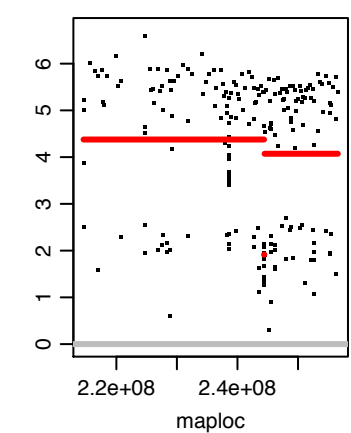

Chromosome HiC\_scaffold\_13

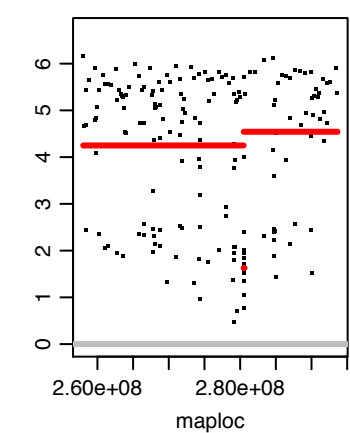

Chromosome HiC\_scaffold\_14

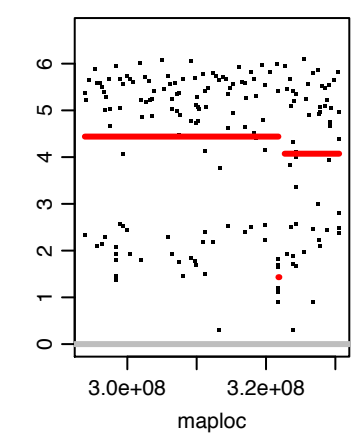

Chromosome HiC\_scaffold\_15

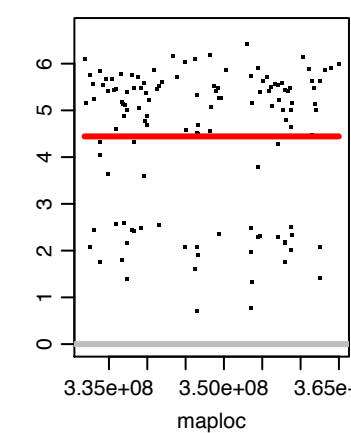

Chromosome HiC\_scaffold\_16

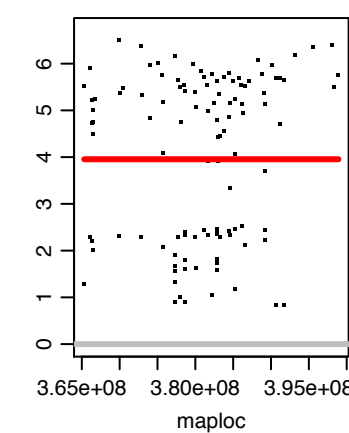

Chromosome HiC\_scaffold\_17

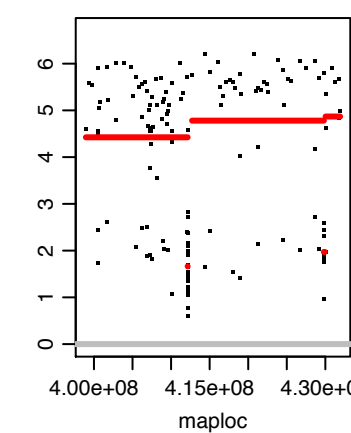

Chromosome HiC\_scaffold\_18

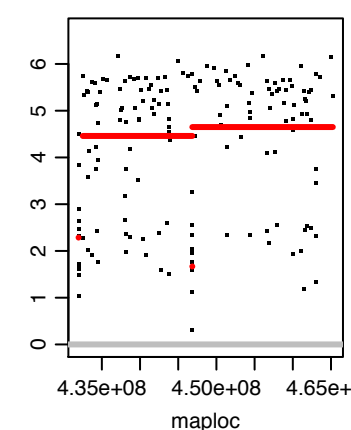

Chromosome HiC\_scaffold\_19

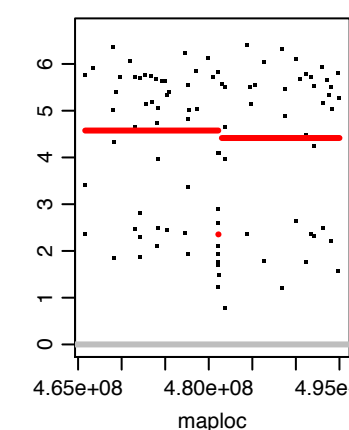

Chromosome HiC\_scaffold\_2

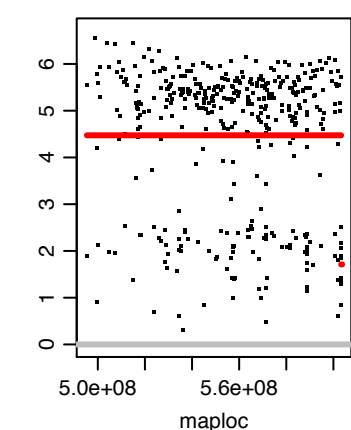

Chromosome HiC\_scaffold\_20

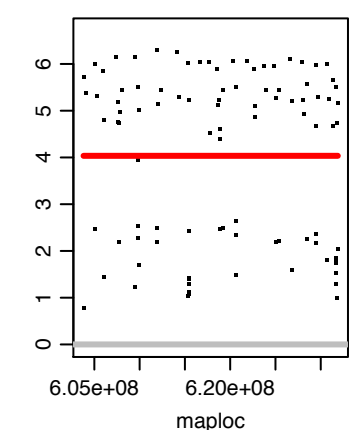

Chromosome HiC\_scaffold\_21

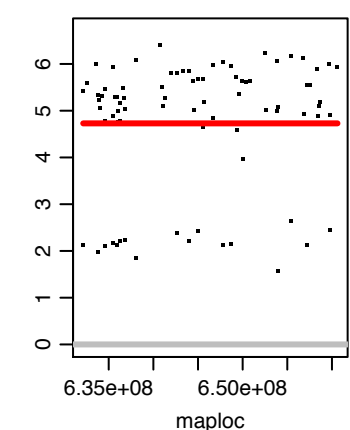

Chromosome HiC\_scaffold\_22

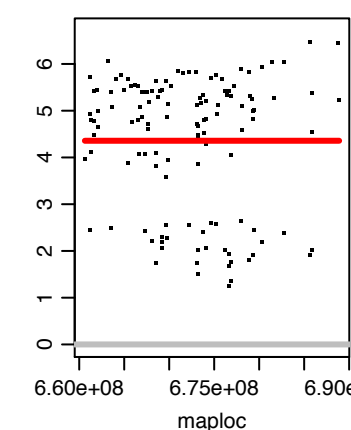

Chromosome HiC\_scaffold\_23

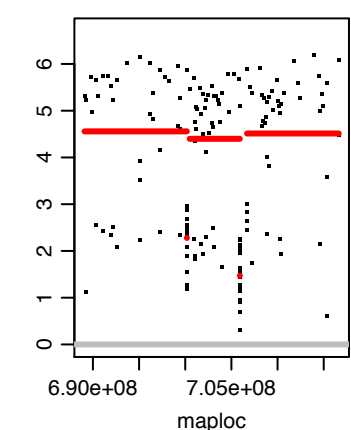

Chromosome HiC\_scaffold\_24

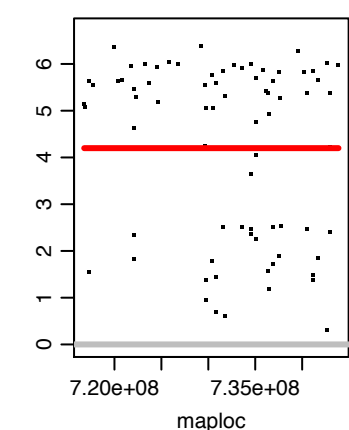

Chromosome HiC\_scaffold\_25

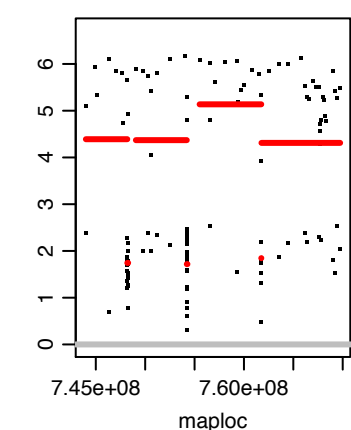

Chromosome HiC\_scaffold\_26

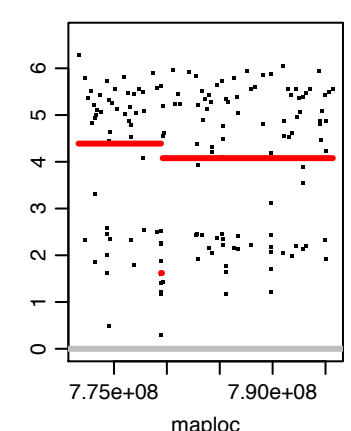

Chromosome HiC\_scaffold\_27

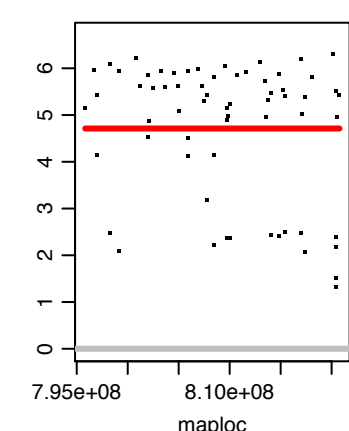

Chromosome HiC\_scaffold\_28

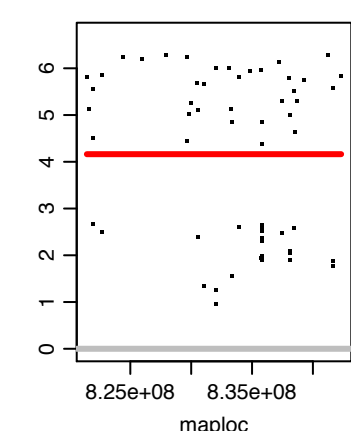

Chromosome HiC\_scaffold\_29

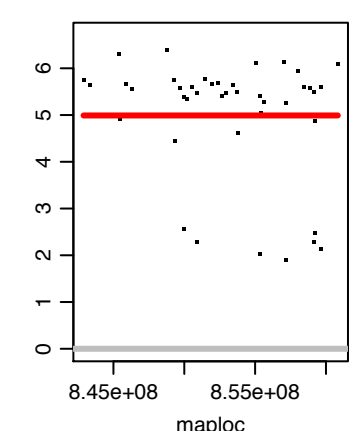

Chromosome HiC\_scaffold\_3

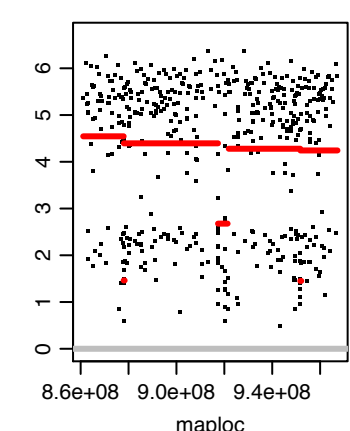

Chromosome HiC\_scaffold\_30

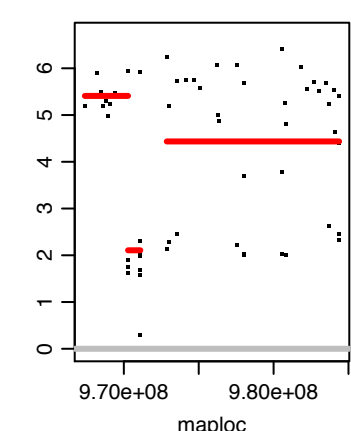

Chromosome HiC\_scaffold\_31

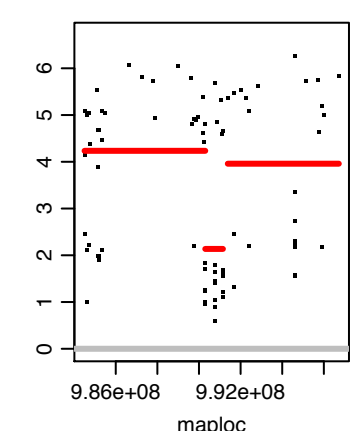

Chromosome HiC\_scaffold\_32

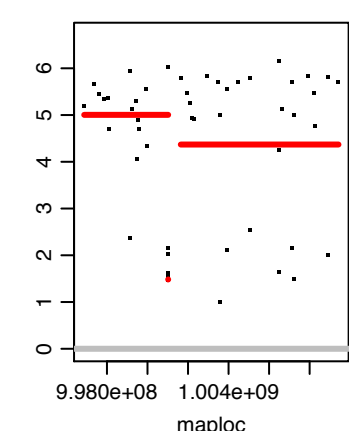

Chromosome HiC\_scaffold\_33

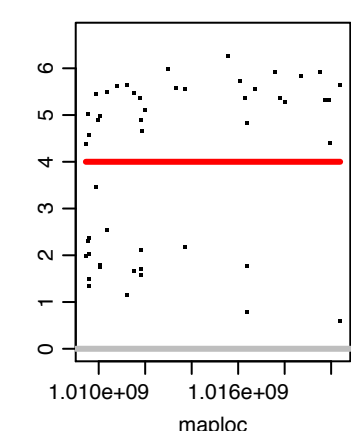

Chromosome HiC\_scaffold\_34

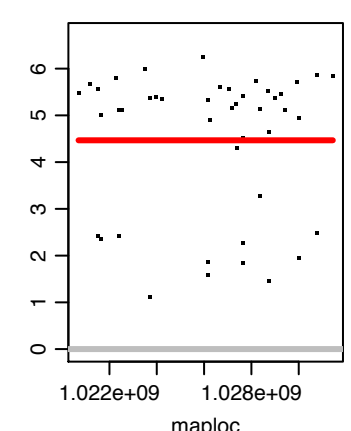

Chromosome HiC\_scaffold\_35

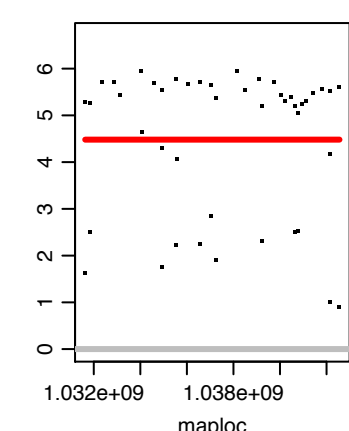

Chromosome HiC\_scaffold\_36

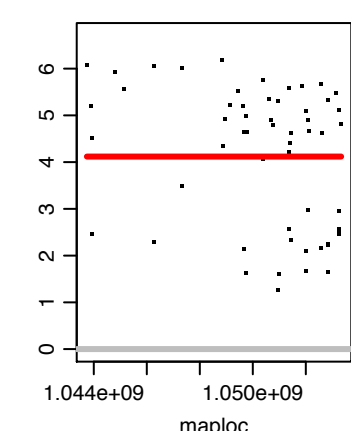

Chromosome HiC\_scaffold\_37

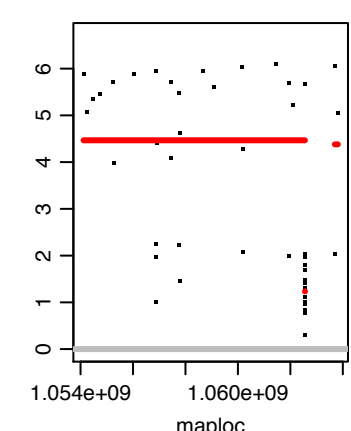

Chromosome HiC\_scaffold\_38

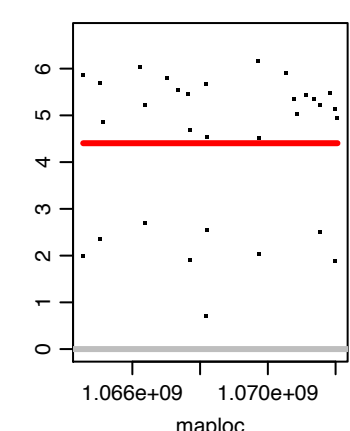

Chromosome HiC\_scaffold\_39

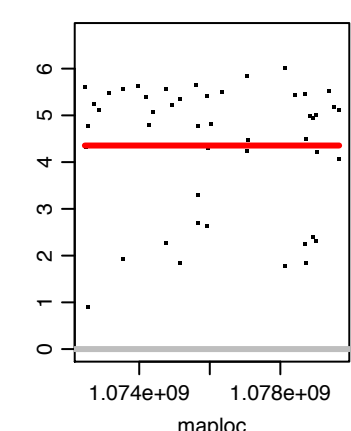

Chromosome HiC\_scaffold\_4

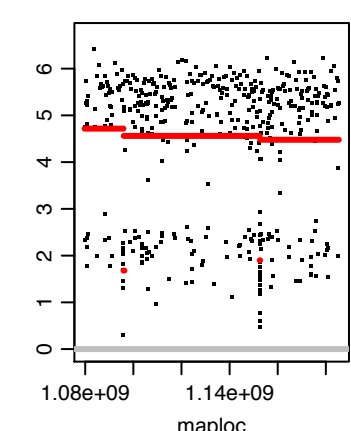

Chromosome HiC\_scaffold\_40

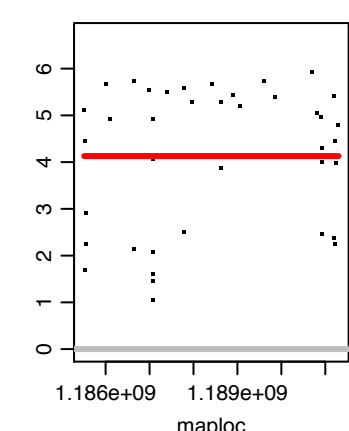

Chromosome HiC\_scaffold\_41

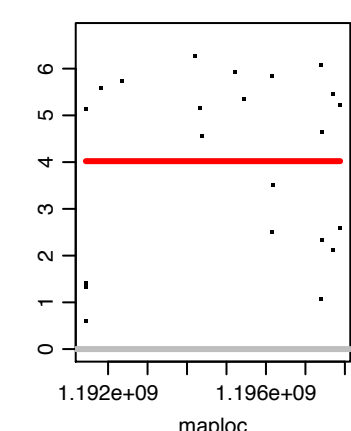

Chromosome HiC\_scaffold\_42

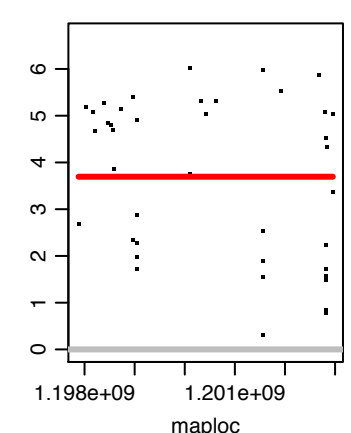

Chromosome HiC\_scaffold\_43

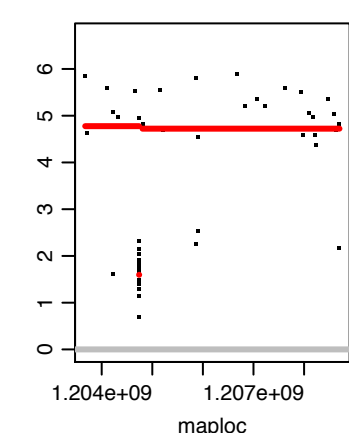

Chromosome HiC\_scaffold\_44

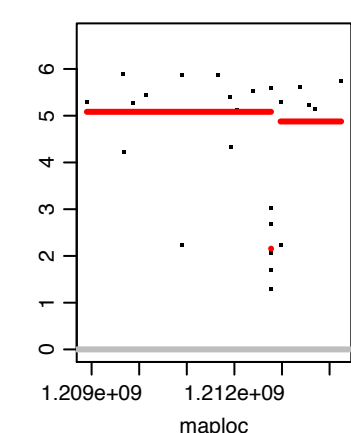

Chromosome HiC\_scaffold\_45

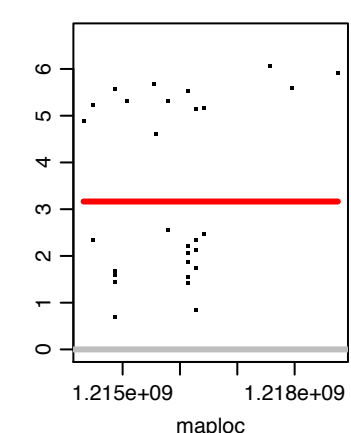

Chromosome HiC\_scaffold\_46

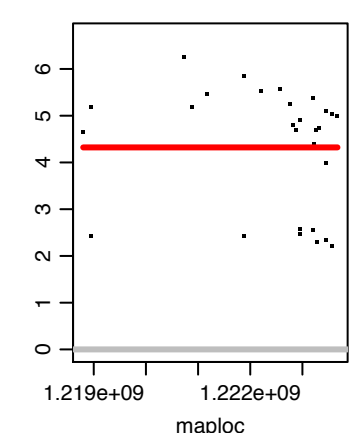

Chromosome HiC\_scaffold\_47

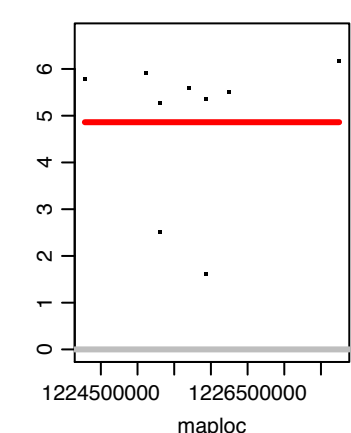

Chromosome HiC\_scaffold\_48

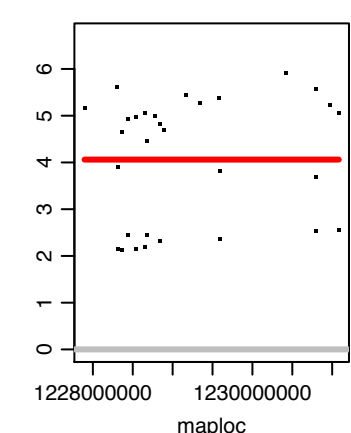

Chromosome HiC\_scaffold\_49

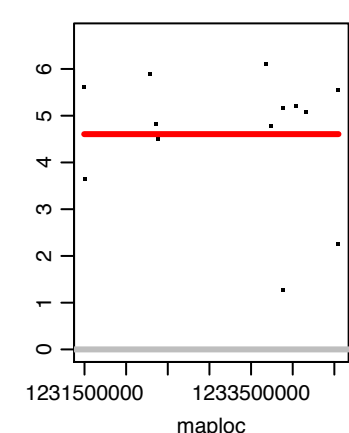

Chromosome HiC\_scaffold\_5

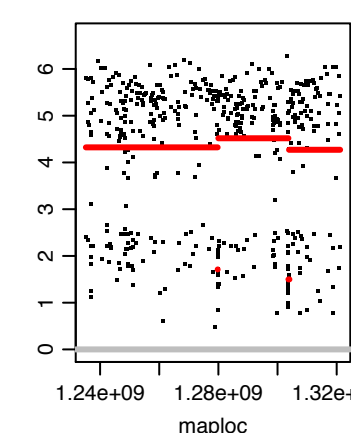

Chromosome HiC\_scaffold\_50

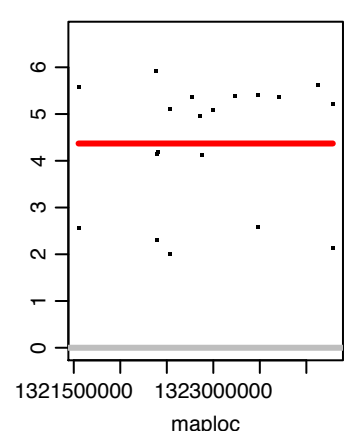

Chromosome HiC\_scaffold\_51

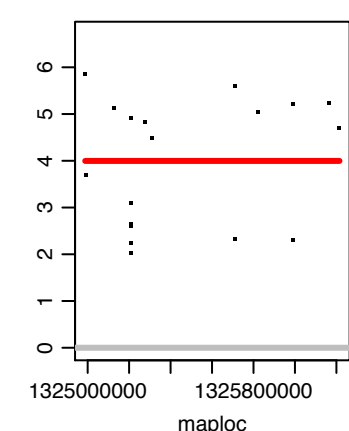

Chromosome HiC\_scaffold\_52

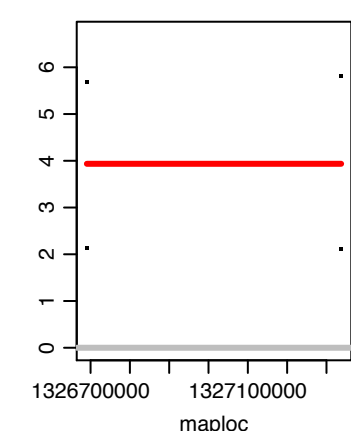

Chromosome HiC\_scaffold\_53

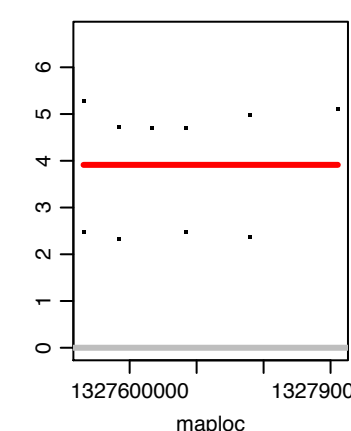

Chromosome HiC\_scaffold\_54

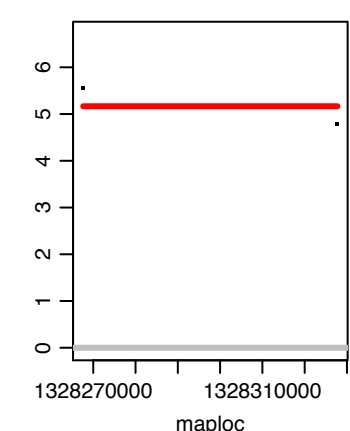

Chromosome HiC\_scaffold\_6

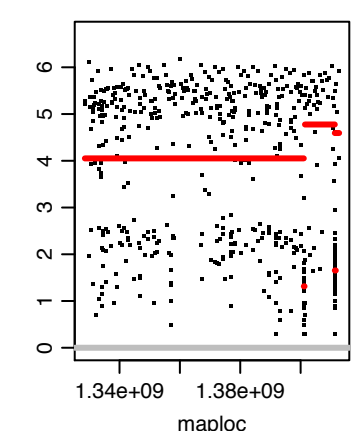

Chromosome HiC\_scaffold\_7

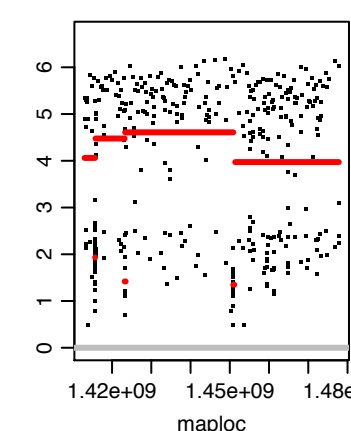

Chromosome HiC\_scaffold\_8

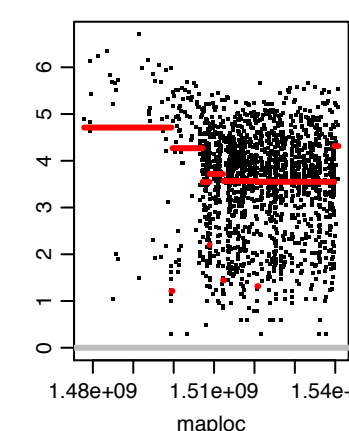

Chromosome HiC\_scaffold\_9

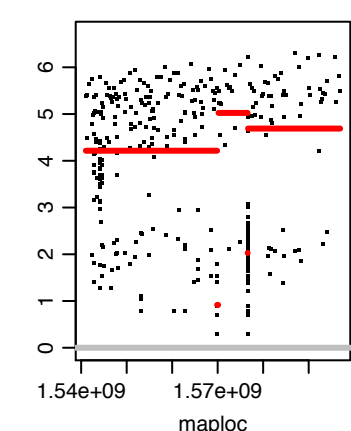

## ARU\_9

Chromosome HiC\_scaffold\_1

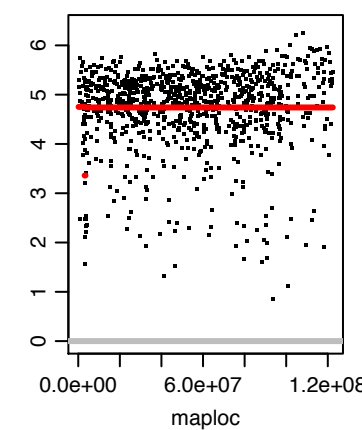

Chromosome HiC\_scaffold\_10

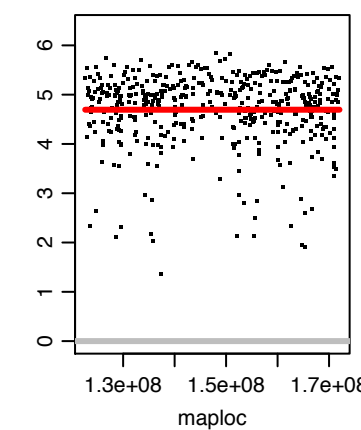

Chromosome HiC\_scaffold\_11

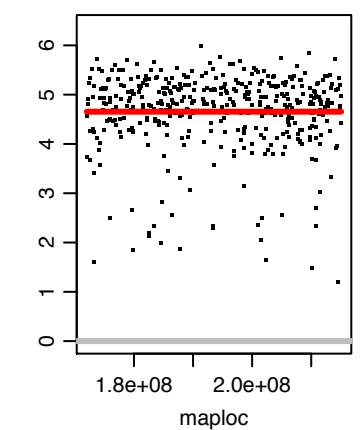

Chromosome HiC\_scaffold\_12

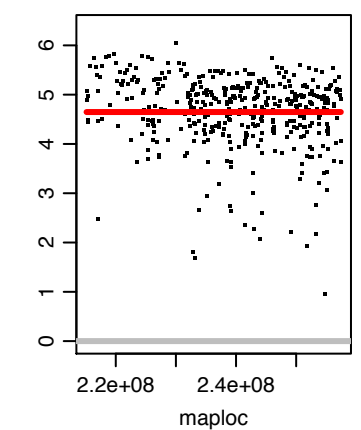

Chromosome HiC\_scaffold\_13

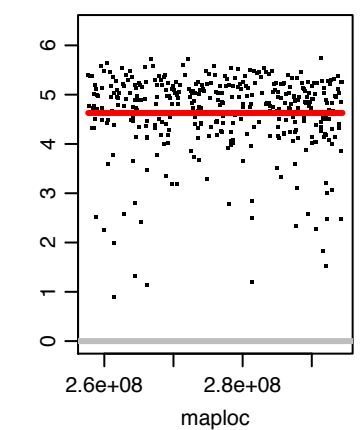

Chromosome HiC\_scaffold\_14

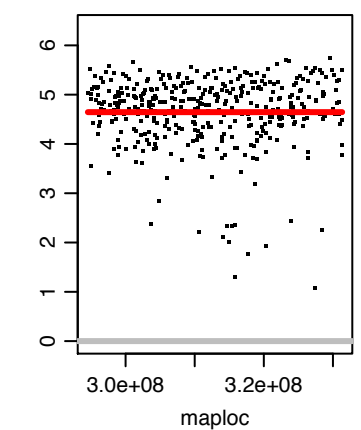

Chromosome HiC\_scaffold\_15

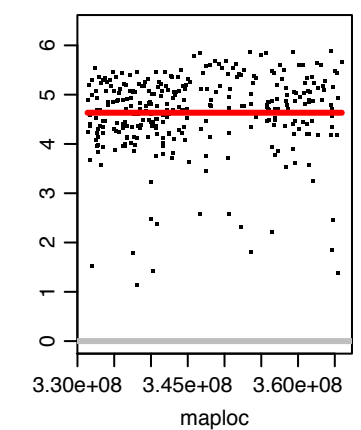

Chromosome HiC\_scaffold\_16

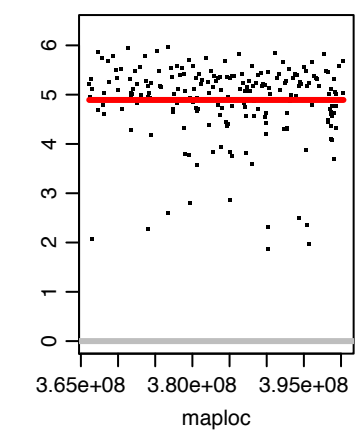

Chromosome HiC\_scaffold\_17

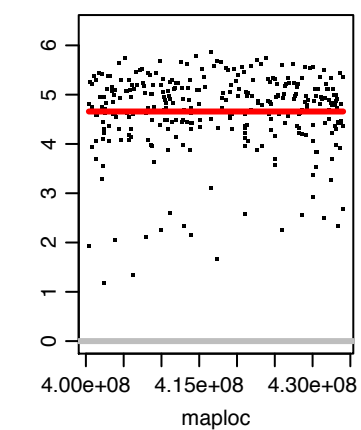

Chromosome HiC\_scaffold\_18

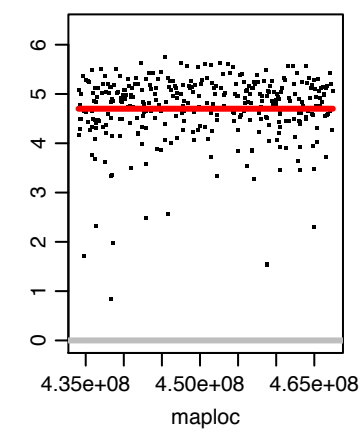

Chromosome HiC\_scaffold\_19

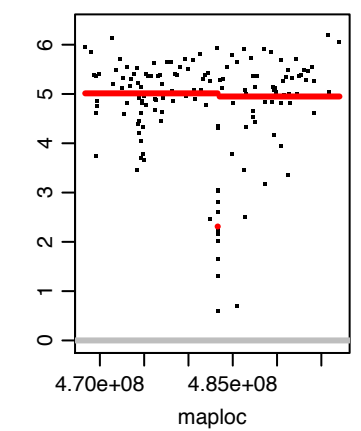

Chromosome HiC\_scaffold\_2

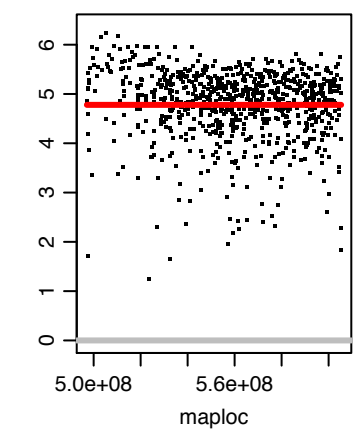

Chromosome HiC\_scaffold\_20

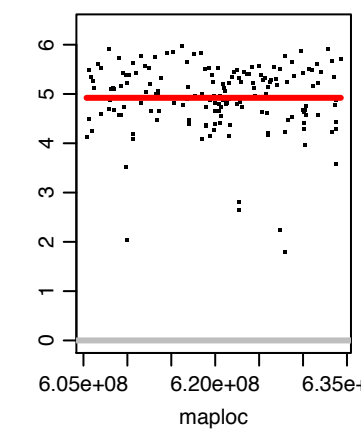

Chromosome HiC\_scaffold\_21

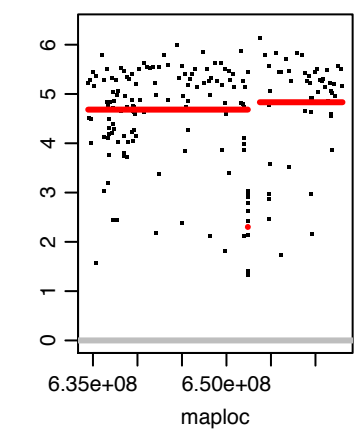

Chromosome HiC\_scaffold\_22

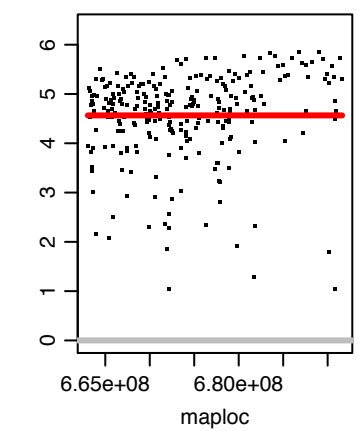

Chromosome HiC\_scaffold\_23

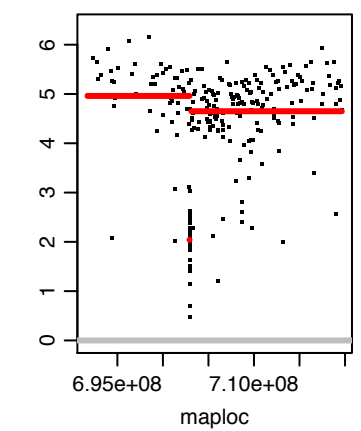

Chromosome HiC\_scaffold\_24

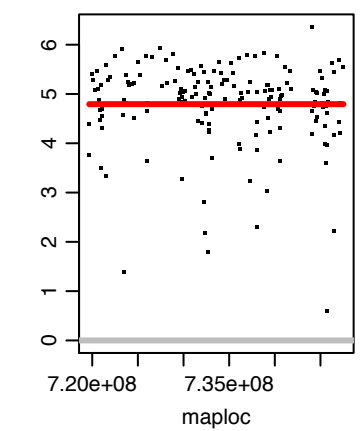

Chromosome HiC\_scaffold\_25

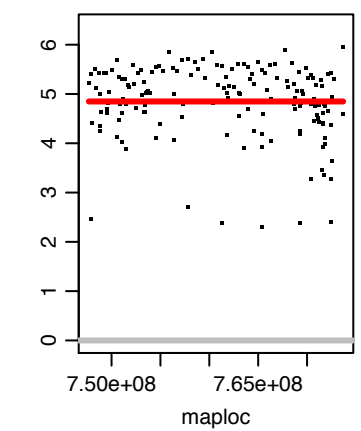

Chromosome HiC\_scaffold\_26

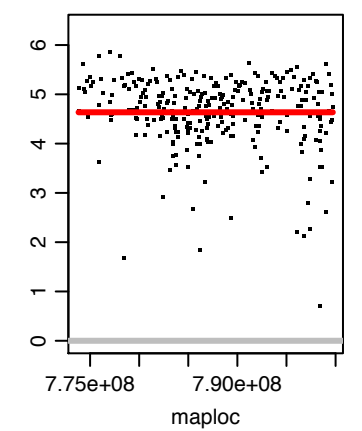

Chromosome HiC\_scaffold\_27

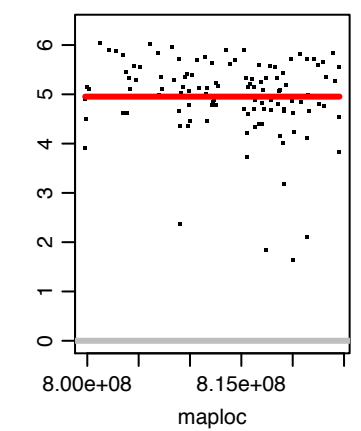

Chromosome HiC\_scaffold\_28

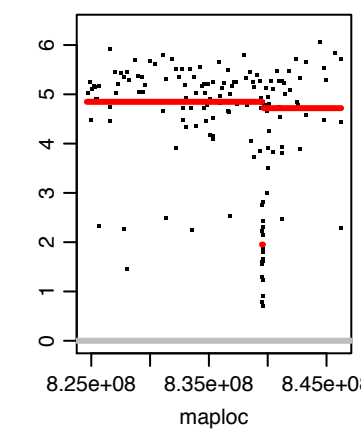

Chromosome HiC\_scaffold\_29

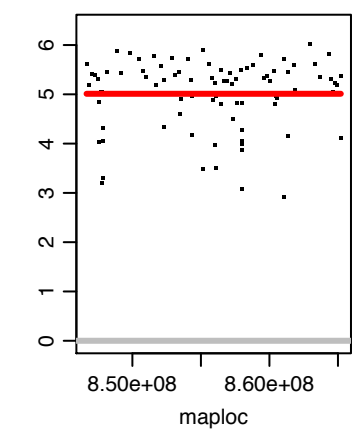

Chromosome HiC\_scaffold\_3

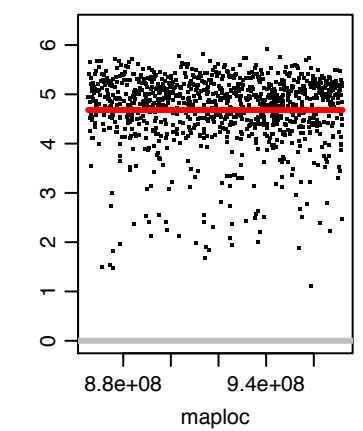

Chromosome HiC\_scaffold\_30

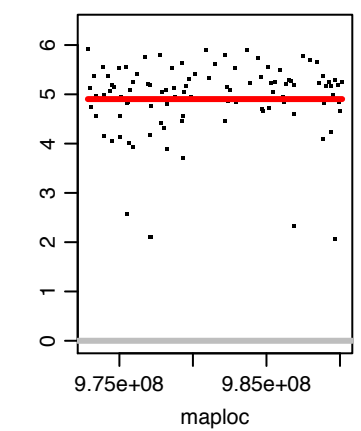

Chromosome HiC\_scaffold\_31

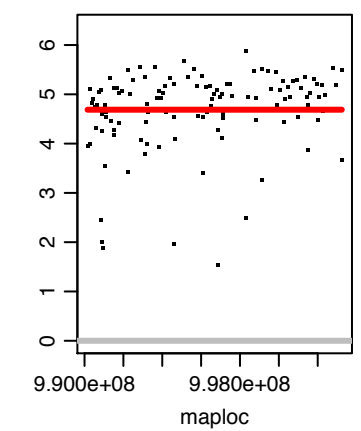

Chromosome HiC\_scaffold\_32

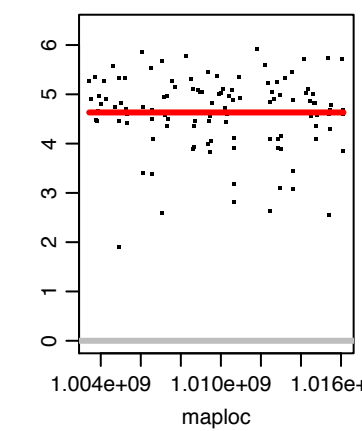

Chromosome HiC\_scaffold\_33

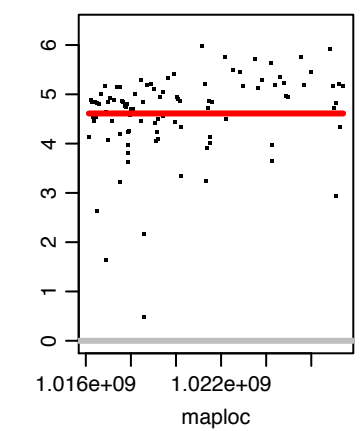

Chromosome HiC\_scaffold\_34

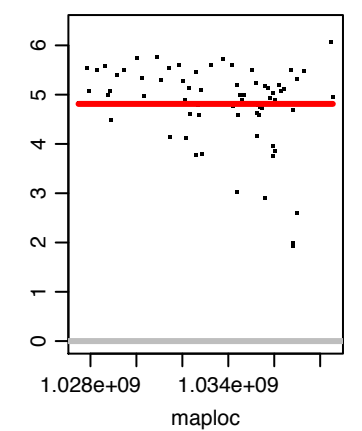

Chromosome HiC\_scaffold\_35

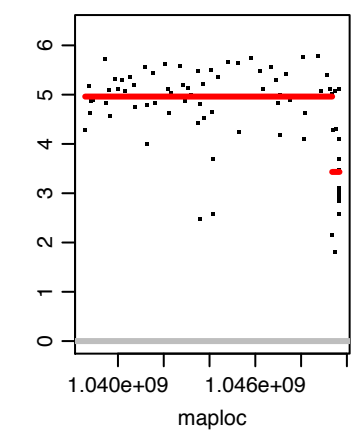

Chromosome HiC\_scaffold\_36

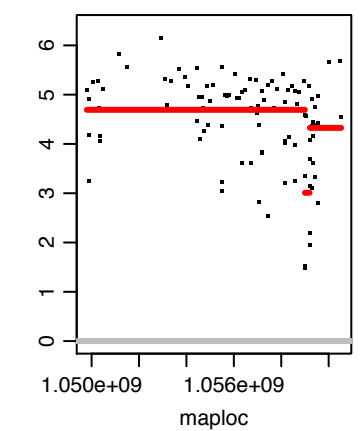

Chromosome HiC\_scaffold\_37

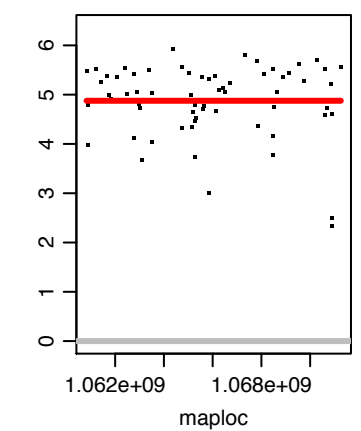

Chromosome HiC\_scaffold\_38

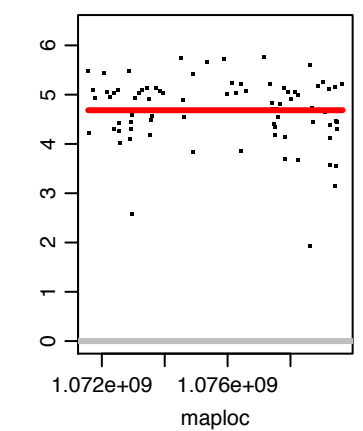

Chromosome HiC\_scaffold\_39

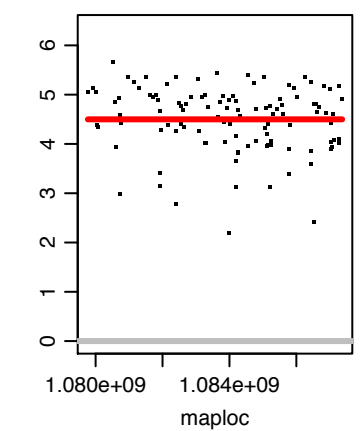

Chromosome HiC\_scaffold\_4

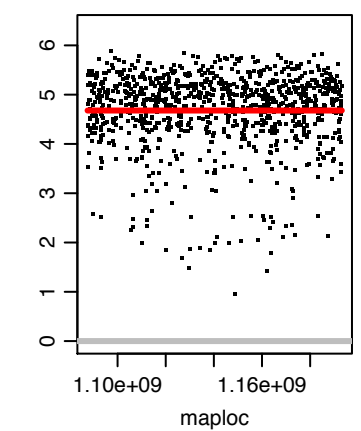

Chromosome HiC\_scaffold\_40

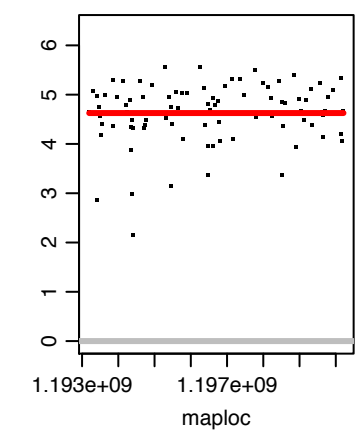

Chromosome HiC\_scaffold\_41

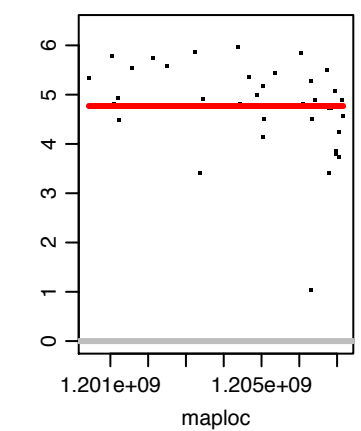

Chromosome HiC\_scaffold\_42

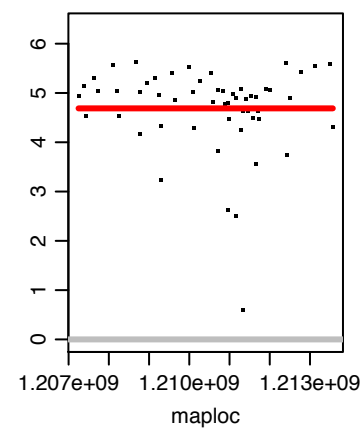

Chromosome HiC\_scaffold\_43

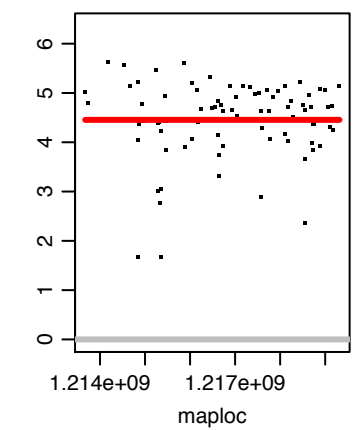

Chromosome HiC\_scaffold\_44

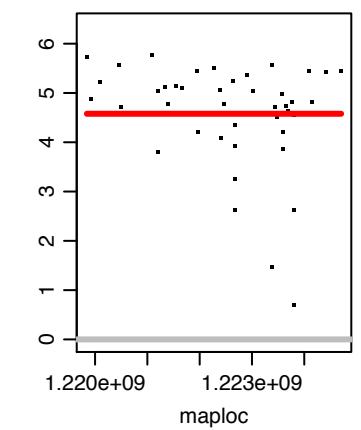

Chromosome HiC\_scaffold\_45

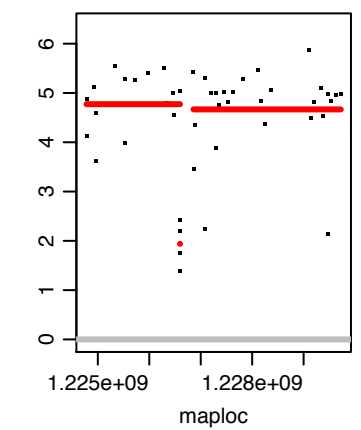

Chromosome HiC\_scaffold\_46

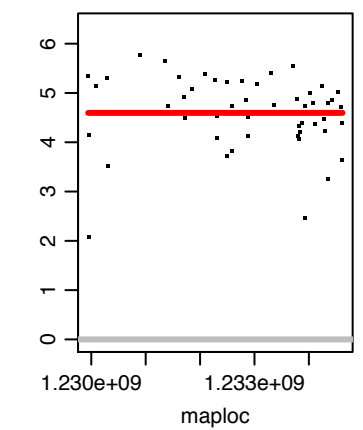

Chromosome HiC\_scaffold\_47

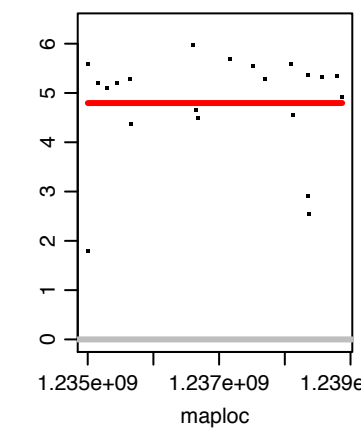

Chromosome HiC\_scaffold\_48

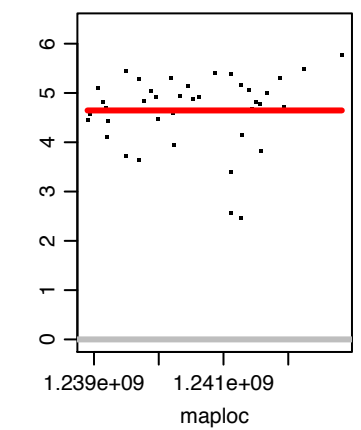

Chromosome HiC\_scaffold\_49

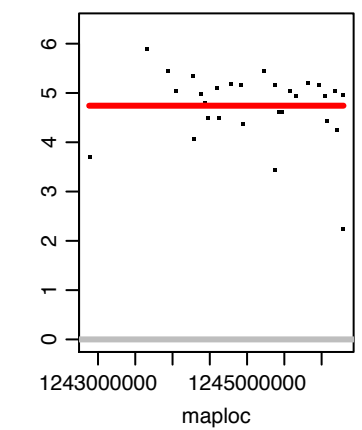

Chromosome HiC\_scaffold\_5

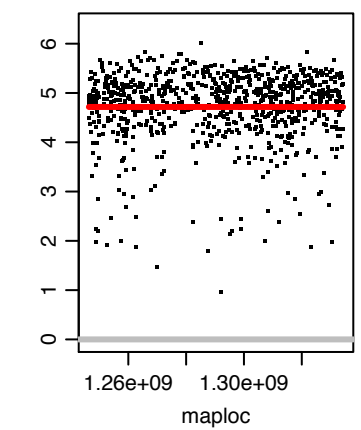

Chromosome HiC\_scaffold\_50

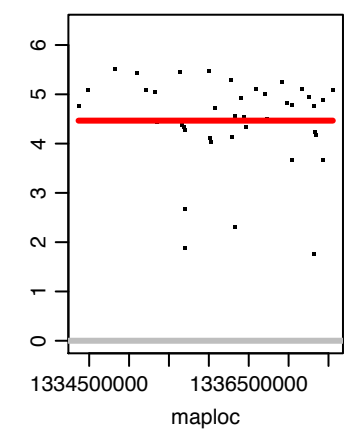

Chromosome HiC\_scaffold\_51

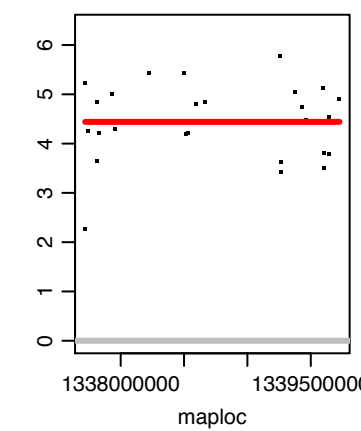

Chromosome HiC\_scaffold\_52

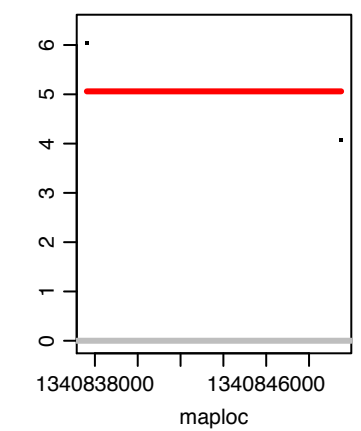

Chromosome HiC\_scaffold\_53

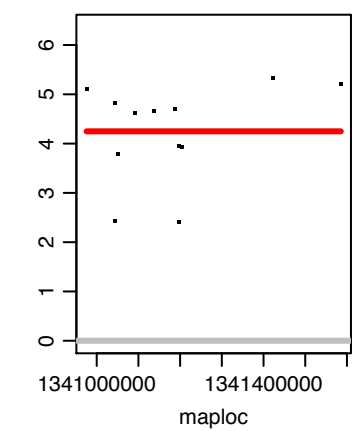

Chromosome HiC\_scaffold\_54

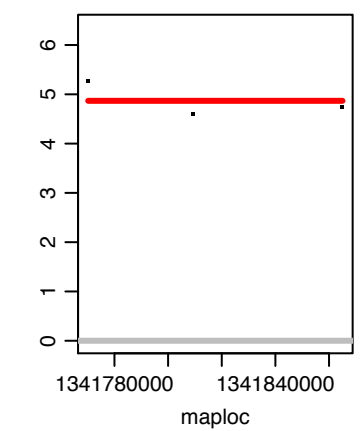

Chromosome HiC\_scaffold\_6

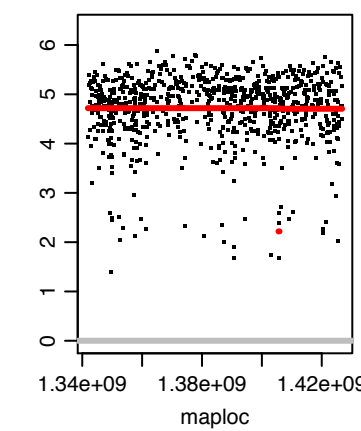

Chromosome HiC\_scaffold\_7

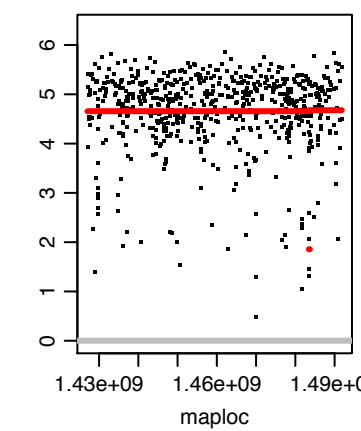

Chromosome HiC\_scaffold\_8

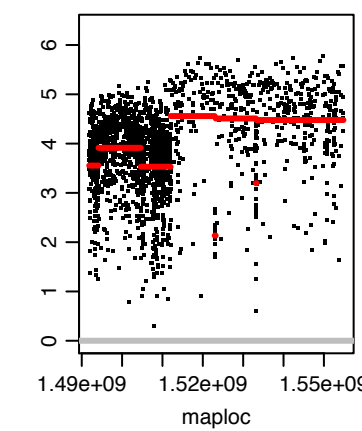

Chromosome HiC\_scaffold\_9

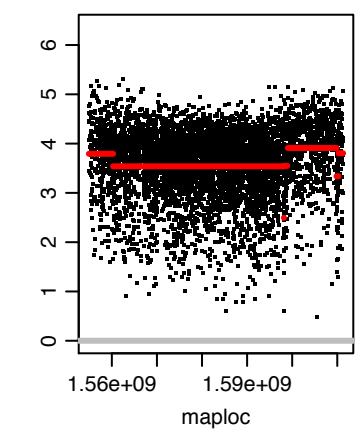



ARU\_13

Chromosome HiC\_scaffold\_1

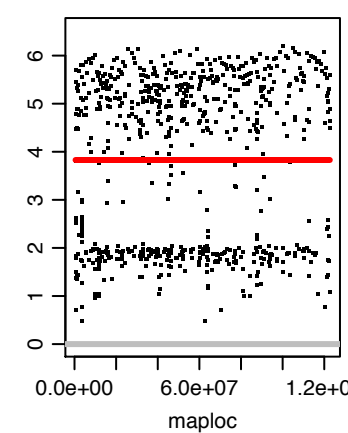

Chromosome HiC\_scaffold\_10

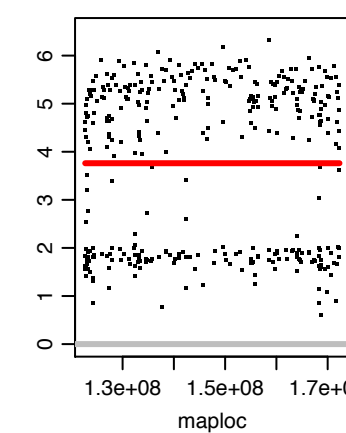

Chromosome HiC\_scaffold\_11

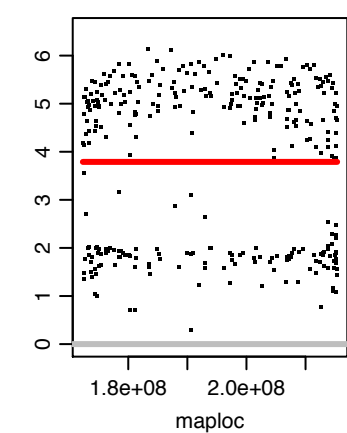

Chromosome HiC\_scaffold\_12

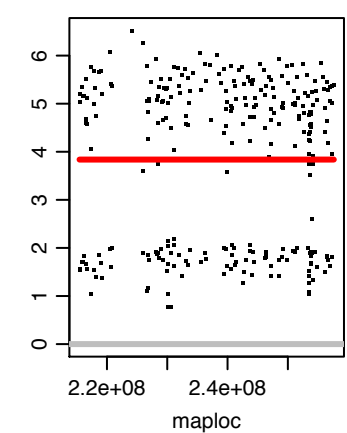

Chromosome HiC\_scaffold\_13

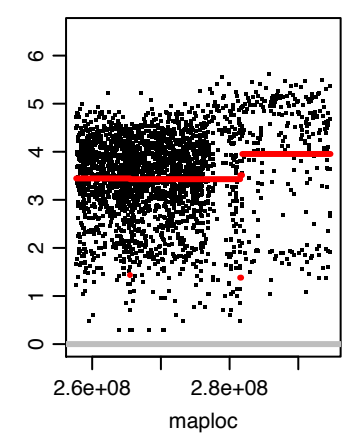

Chromosome HiC\_scaffold\_14

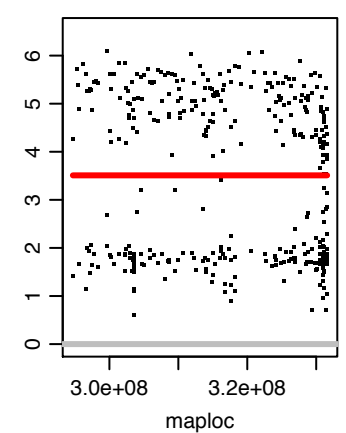

Chromosome HiC\_scaffold\_15

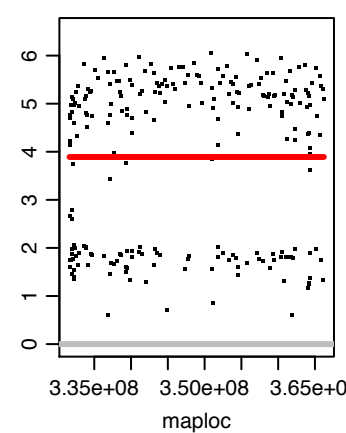

Chromosome HiC\_scaffold\_16

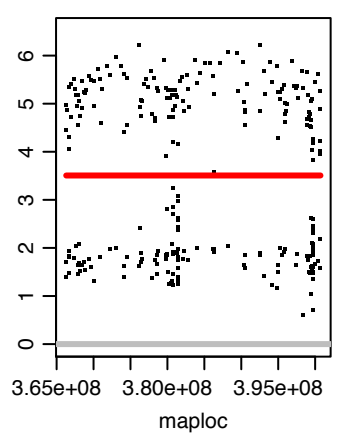

Chromosome HiC\_scaffold\_17

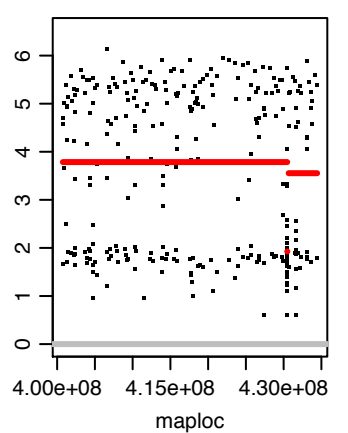

Chromosome HiC\_scaffold\_18

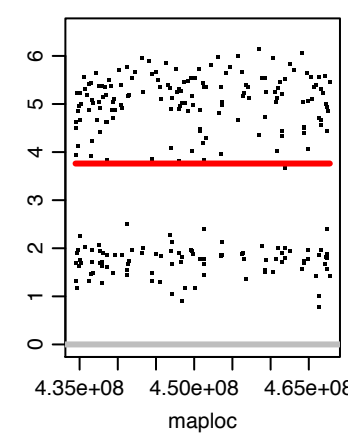

Chromosome HiC\_scaffold\_19

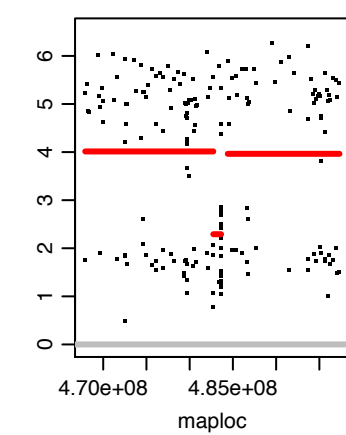

Chromosome HiC\_scaffold\_2

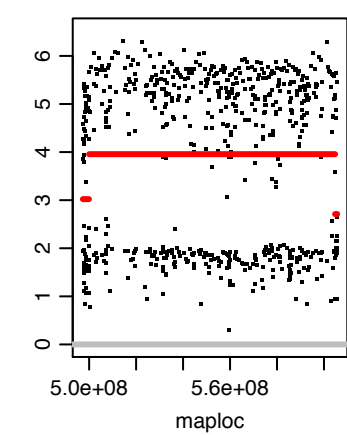

Chromosome HiC\_scaffold\_20

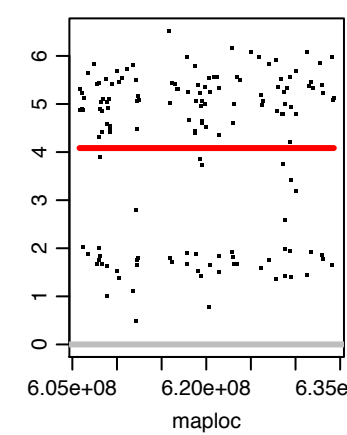

Chromosome HiC\_scaffold\_21

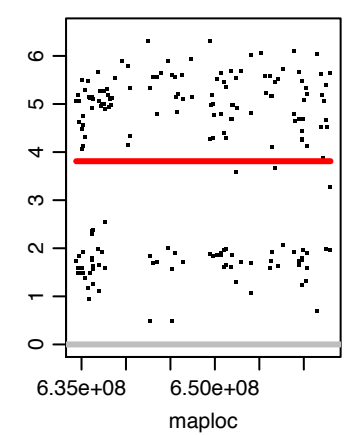

Chromosome HiC\_scaffold\_22

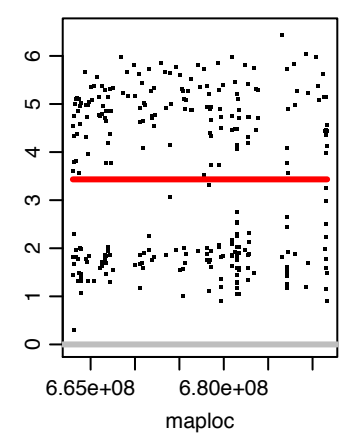

Chromosome HiC\_scaffold\_23

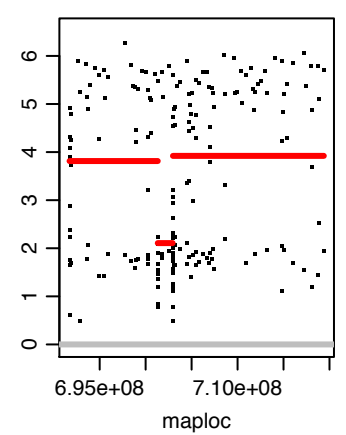

Chromosome HiC\_scaffold\_24

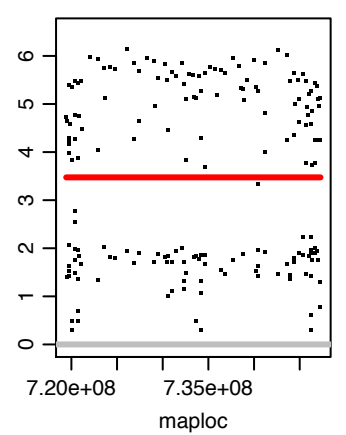

Chromosome HiC\_scaffold\_25

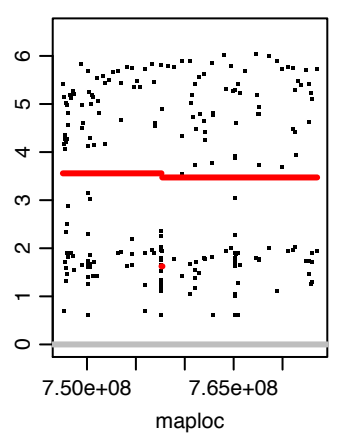

Chromosome HiC\_scaffold\_26

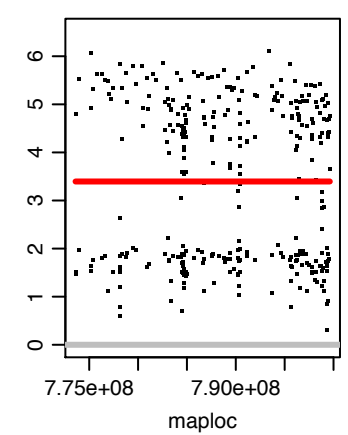

Chromosome HiC\_scaffold\_27

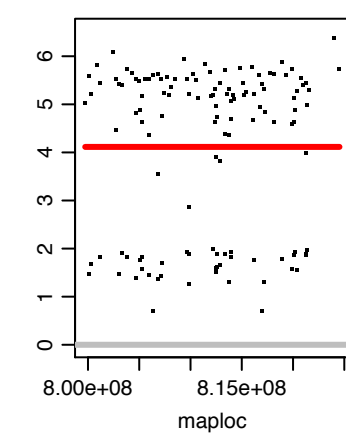

Chromosome HiC\_scaffold\_28

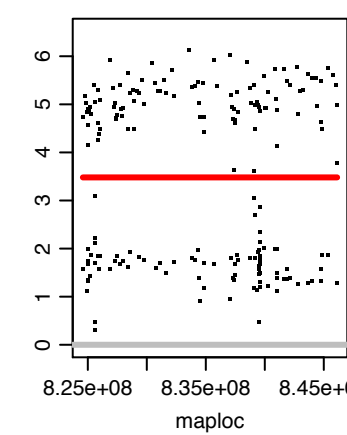

Chromosome HiC\_scaffold\_29

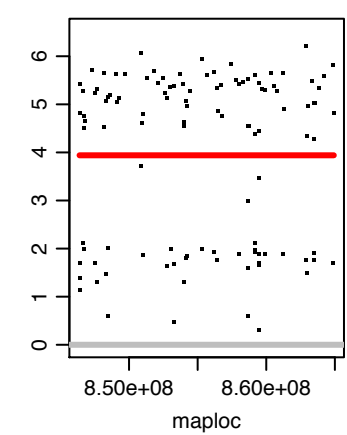

Chromosome HiC\_scaffold\_3

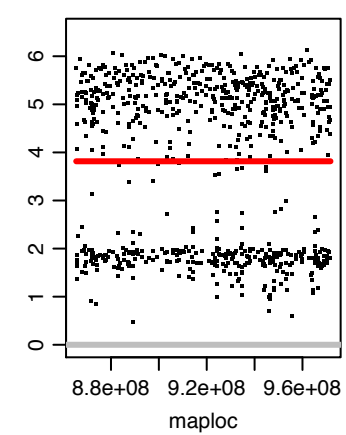

Chromosome HiC\_scaffold\_30

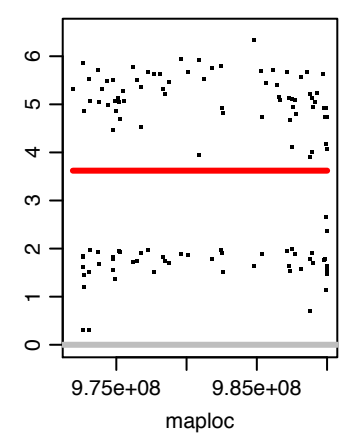

Chromosome HiC\_scaffold\_31

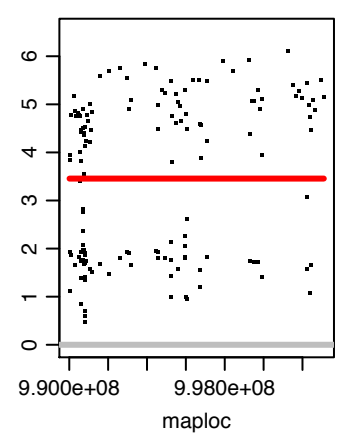

Chromosome HiC\_scaffold\_32

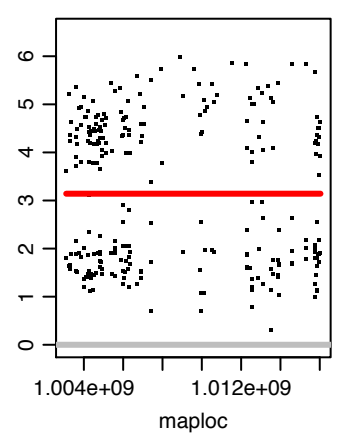

Chromosome HiC\_scaffold\_33

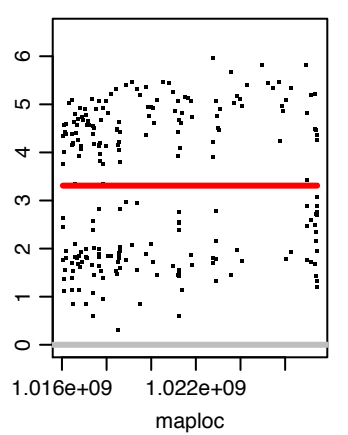

Chromosome HiC\_scaffold\_34

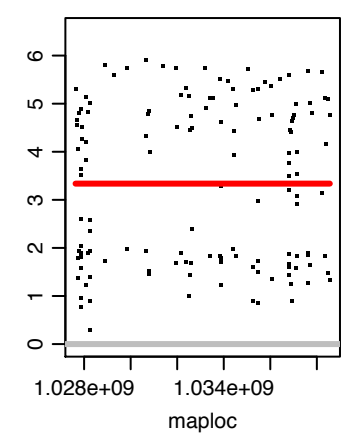

Chromosome HiC\_scaffold\_35

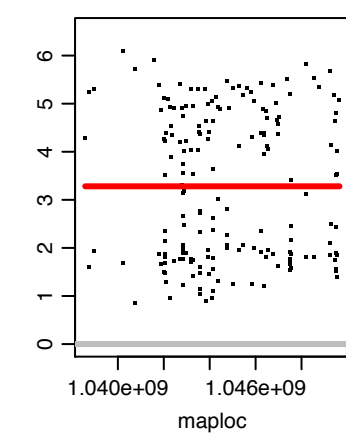

Chromosome HiC\_scaffold\_36

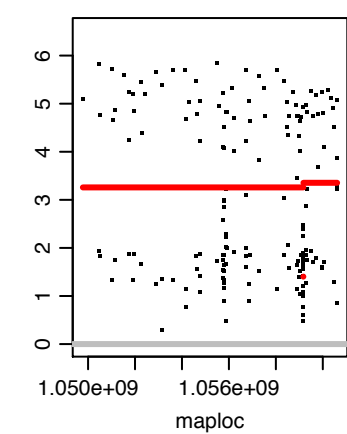

Chromosome HiC\_scaffold\_37

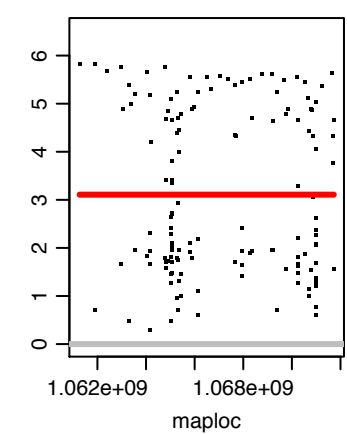

Chromosome HiC\_scaffold\_38

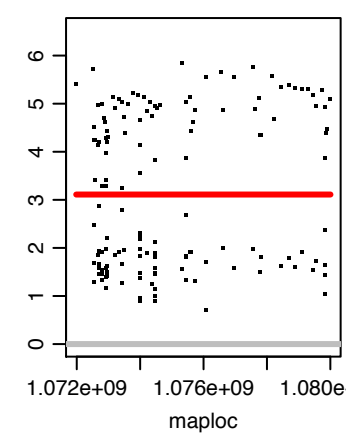

Chromosome HiC\_scaffold\_39

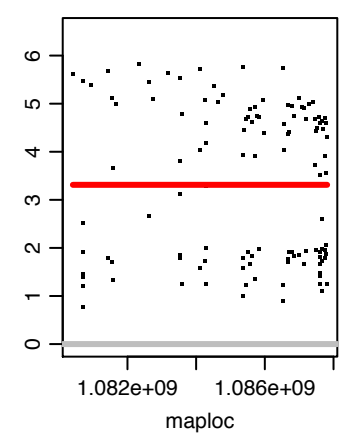

Chromosome HiC\_scaffold\_4

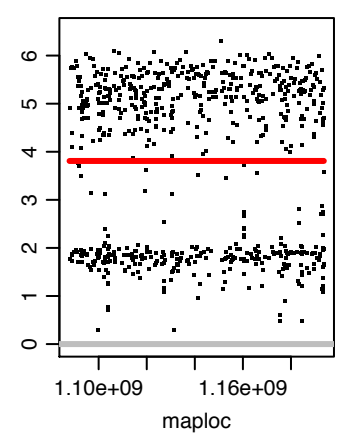

Chromosome HiC\_scaffold\_40

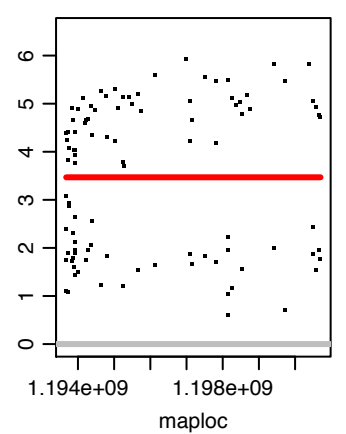

Chromosome HiC\_scaffold\_41

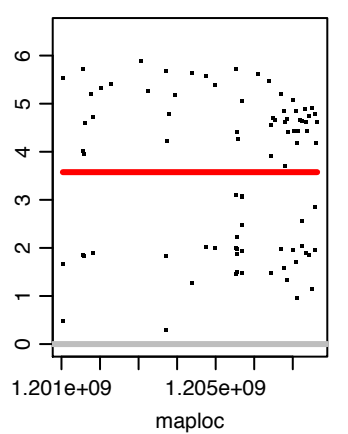

Chromosome HiC\_scaffold\_42

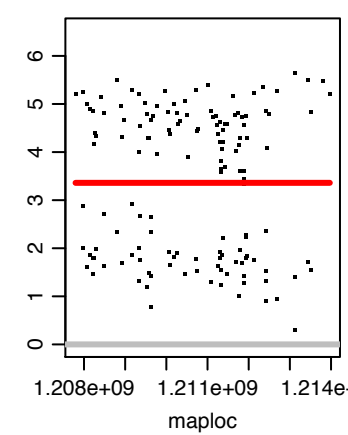

Chromosome HiC\_scaffold\_43

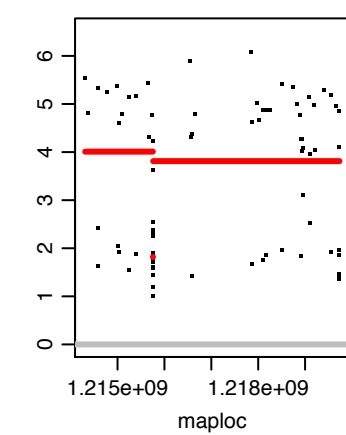

Chromosome HiC\_scaffold\_44

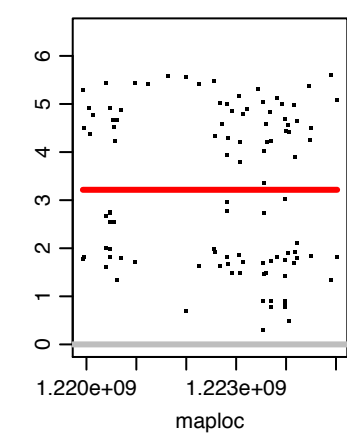

Chromosome HiC\_scaffold\_45

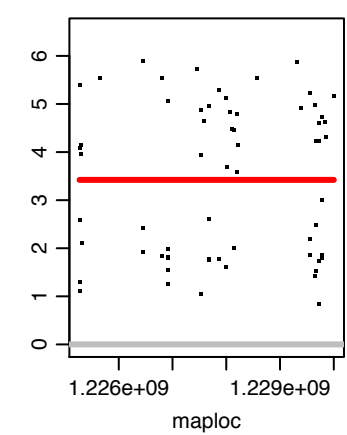

Chromosome HiC\_scaffold\_46

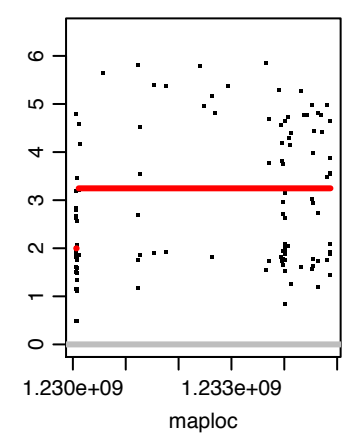

Chromosome HiC\_scaffold\_47

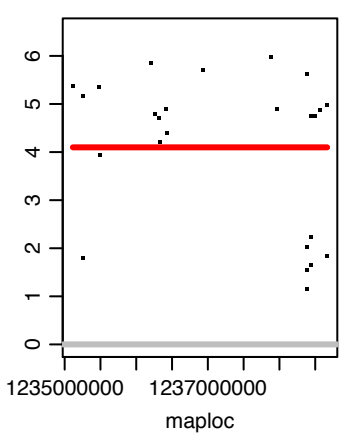

Chromosome HiC\_scaffold\_48

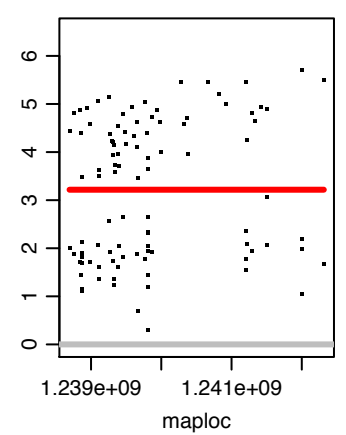

Chromosome HiC\_scaffold\_49

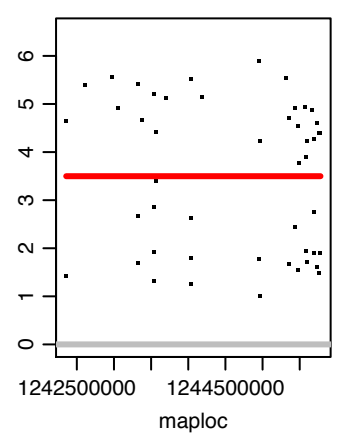

Chromosome HiC\_scaffold\_5

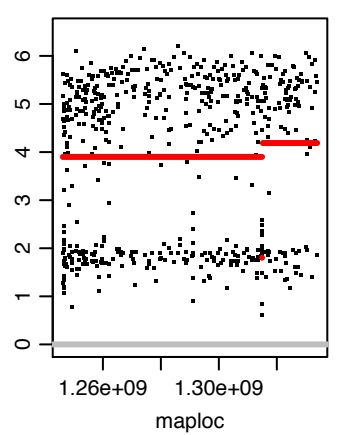

Chromosome HiC\_scaffold\_50

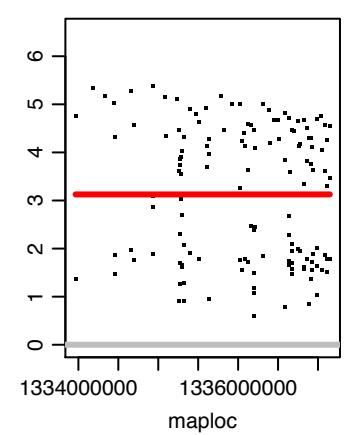

Chromosome HiC\_scaffold\_51

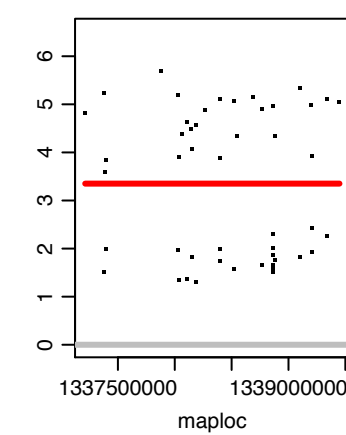

Chromosome HiC\_scaffold\_52

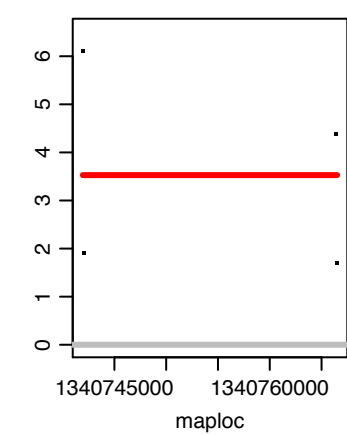

Chromosome HiC\_scaffold\_53

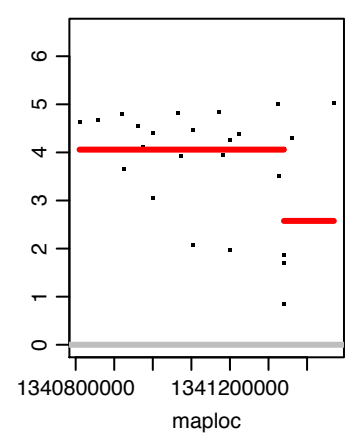

Chromosome HiC\_scaffold\_54

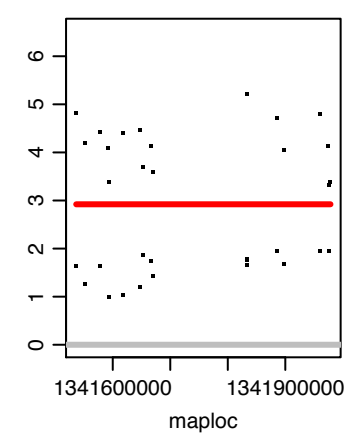

Chromosome HiC\_scaffold\_55

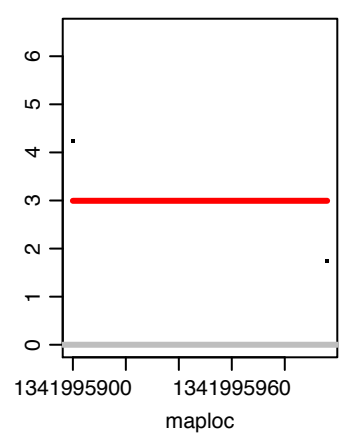

Chromosome HiC\_scaffold\_6

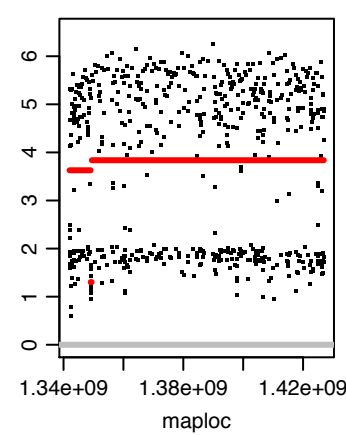

Chromosome HiC\_scaffold\_7

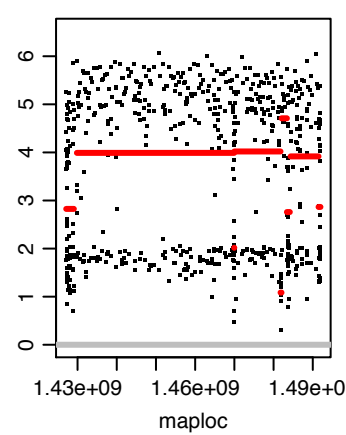

Chromosome HiC\_scaffold\_8

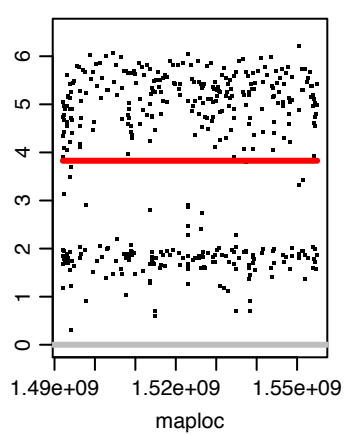

Chromosome HiC\_scaffold\_9

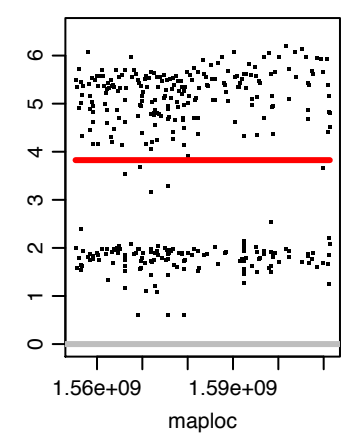

## ARU\_14

Chromosome HiC\_scaffold\_1

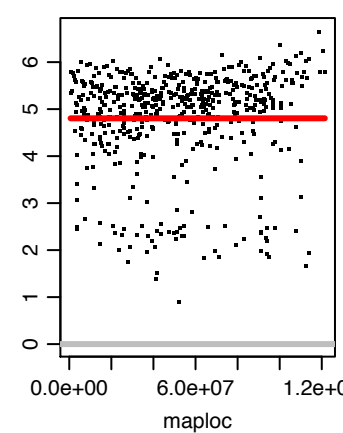

Chromosome HiC\_scaffold\_10

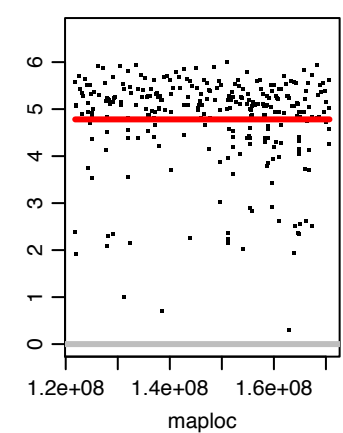

Chromosome HiC\_scaffold\_11

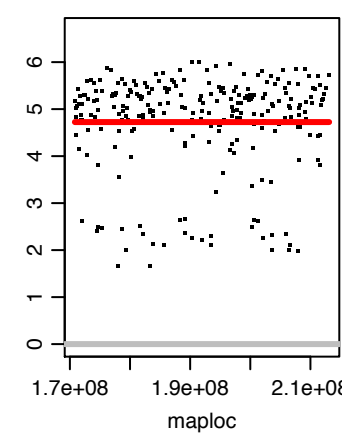

Chromosome HiC\_scaffold\_12

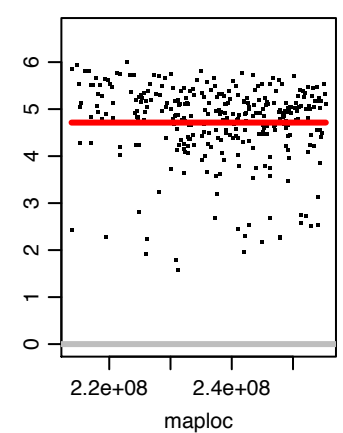

Chromosome HiC\_scaffold\_13

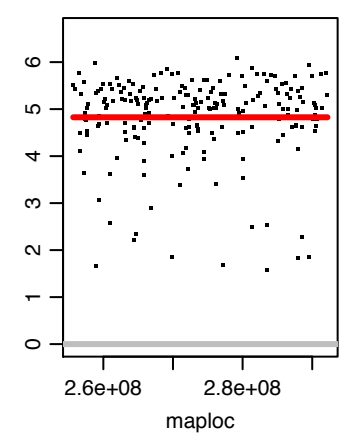

Chromosome HiC\_scaffold\_14

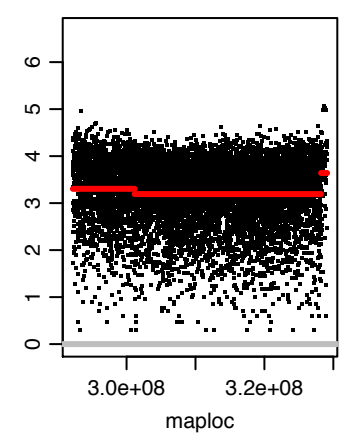

Chromosome HiC\_scaffold\_15

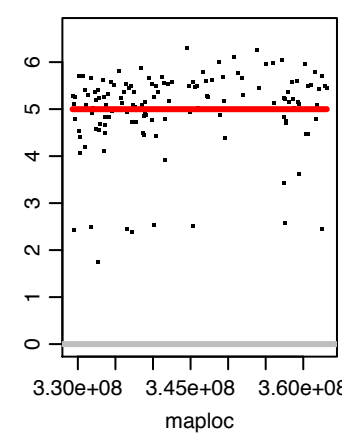

Chromosome HiC\_scaffold\_16

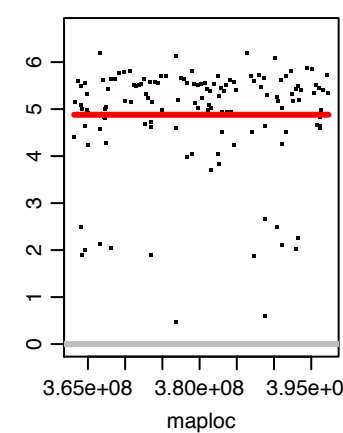

Chromosome HiC\_scaffold\_17

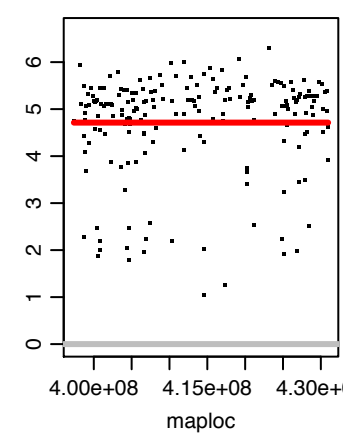

Chromosome HiC\_scaffold\_18

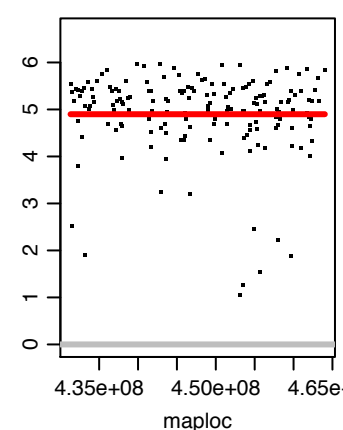

Chromosome HiC\_scaffold\_19

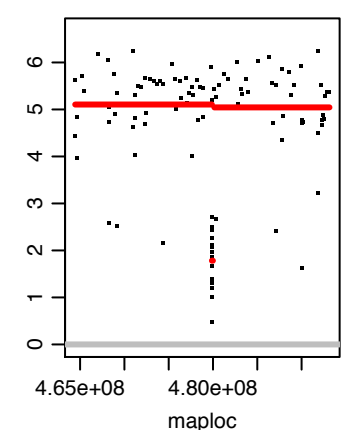

Chromosome HiC\_scaffold\_2

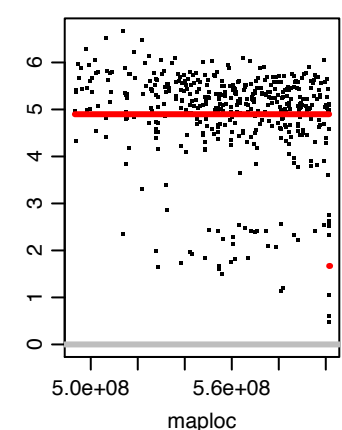

Chromosome HiC\_scaffold\_20

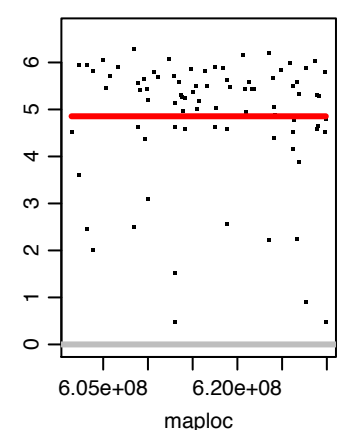

Chromosome HiC\_scaffold\_21

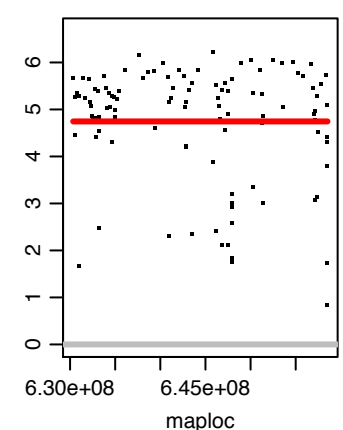

Chromosome HiC\_scaffold\_22

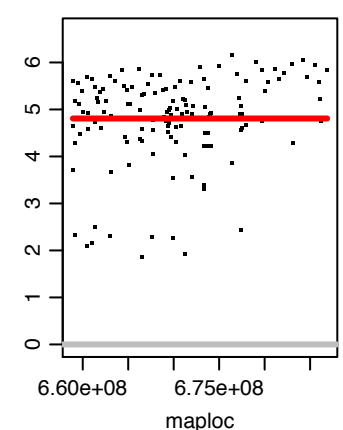

Chromosome HiC\_scaffold\_23

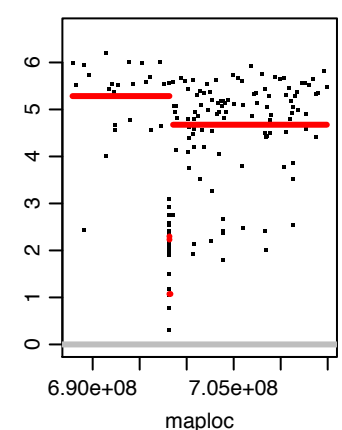

Chromosome HiC\_scaffold\_24

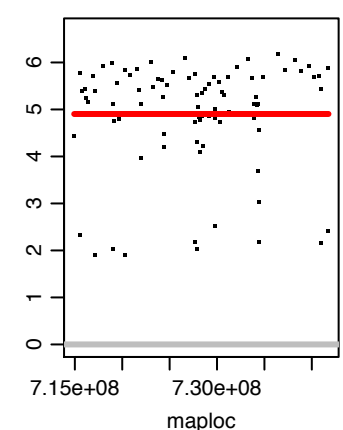

Chromosome HiC\_scaffold\_25

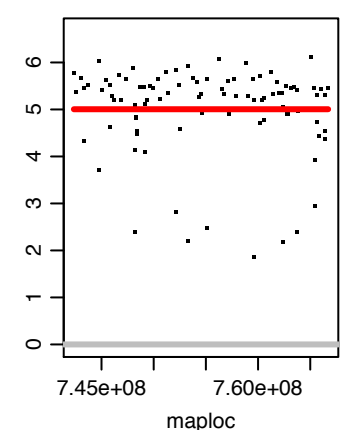

Chromosome HiC\_scaffold\_26

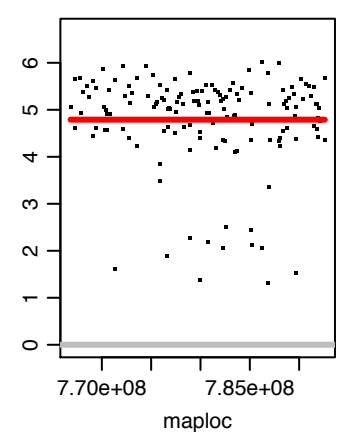

Chromosome HiC\_scaffold\_27

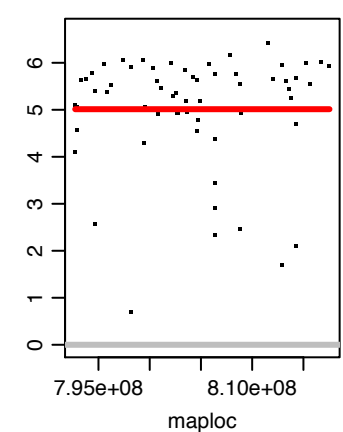

Chromosome HiC\_scaffold\_28

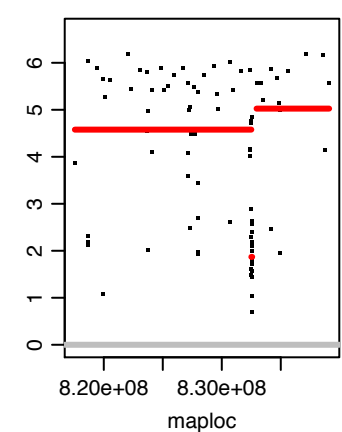

Chromosome HiC\_scaffold\_29

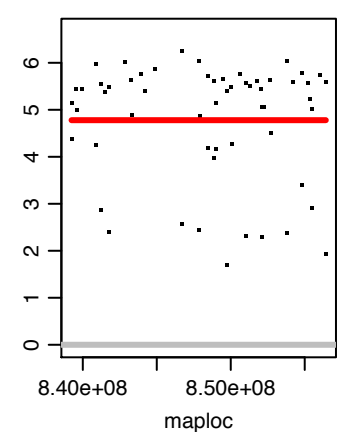

Chromosome HiC\_scaffold\_3

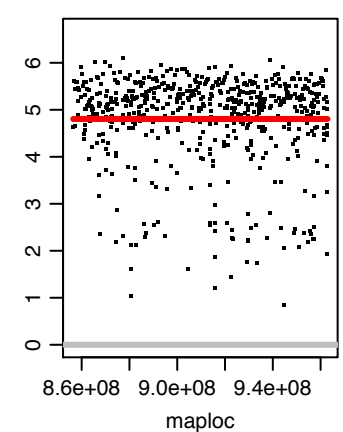

Chromosome HiC\_scaffold\_30

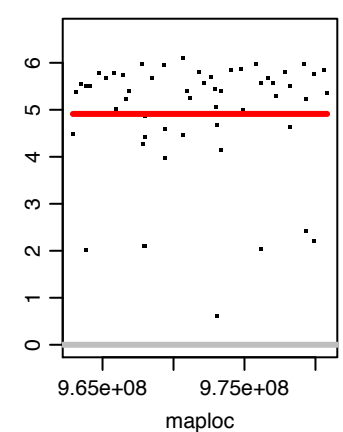

Chromosome HiC\_scaffold\_31

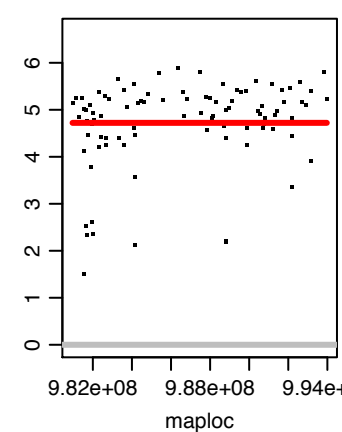

Chromosome HiC\_scaffold\_32

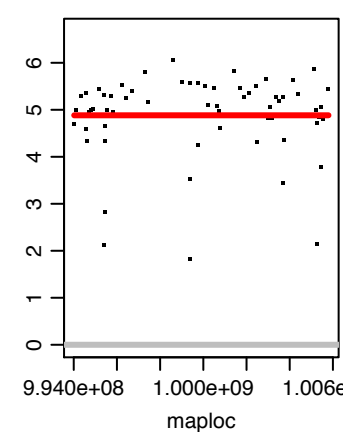

Chromosome HiC\_scaffold\_33

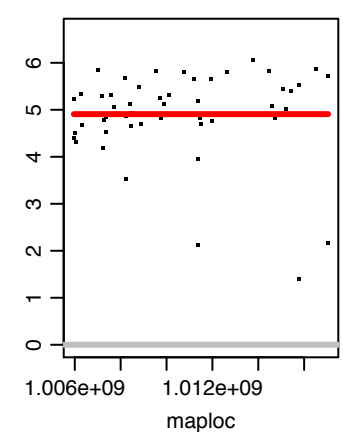

Chromosome HiC\_scaffold\_34

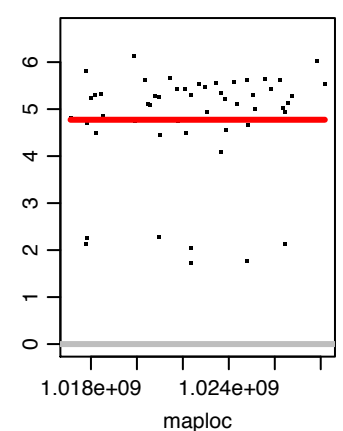

Chromosome HiC\_scaffold\_35

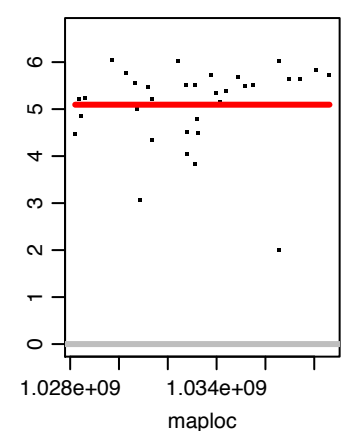

Chromosome HiC\_scaffold\_36

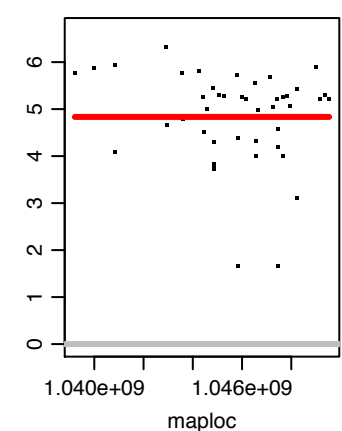

Chromosome HiC\_scaffold\_37

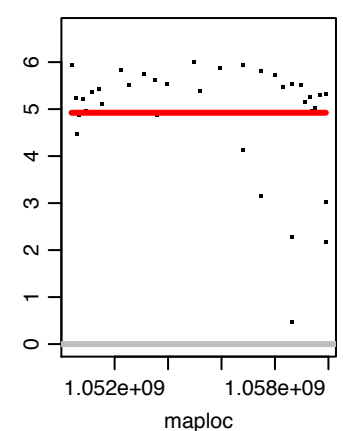

Chromosome HiC\_scaffold\_38

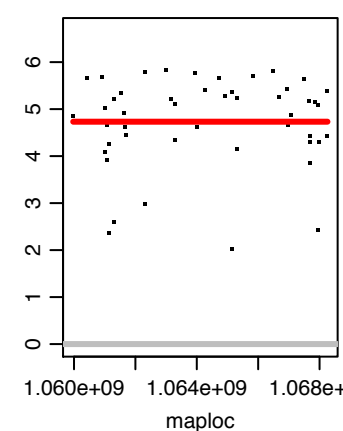

Chromosome HiC\_scaffold\_39

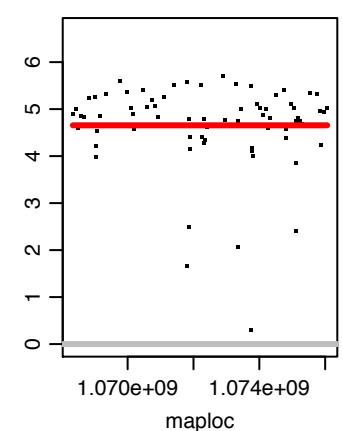

Chromosome HiC\_scaffold\_4

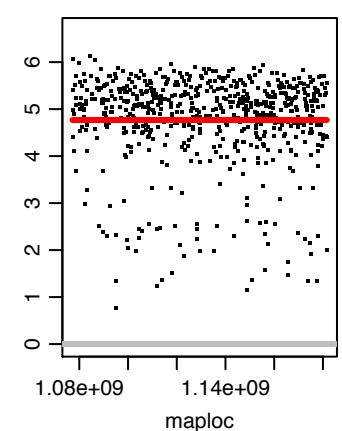

Chromosome HiC\_scaffold\_40

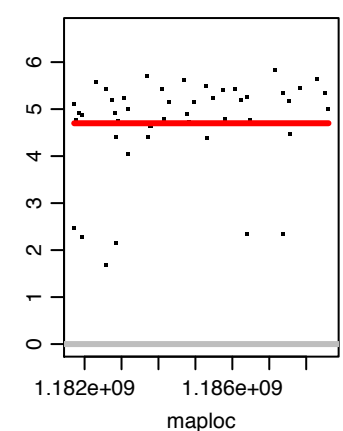

Chromosome HiC\_scaffold\_41

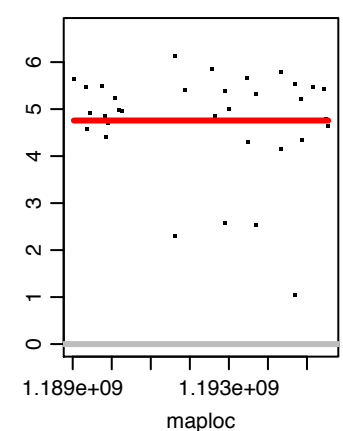

Chromosome HiC\_scaffold\_42

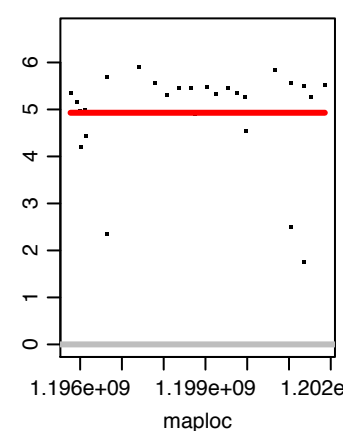

Chromosome HiC\_scaffold\_43

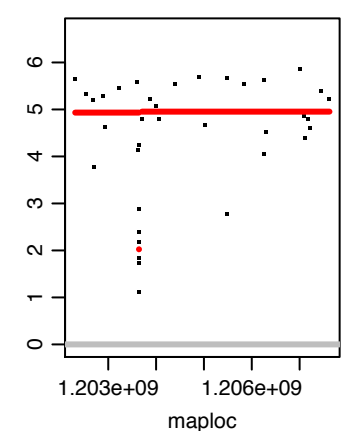

Chromosome HiC\_scaffold\_44

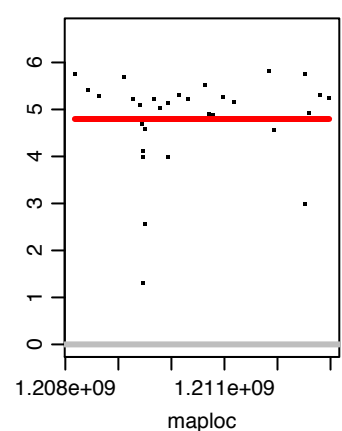

Chromosome HiC\_scaffold\_45

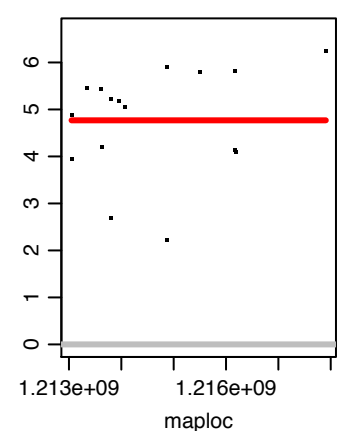

Chromosome HiC\_scaffold\_46

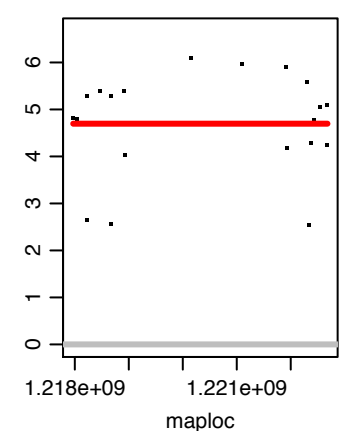

Chromosome HiC\_scaffold\_47

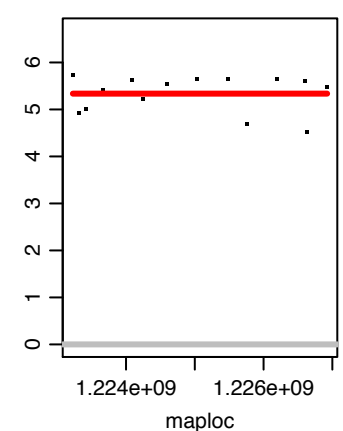

Chromosome HiC\_scaffold\_48

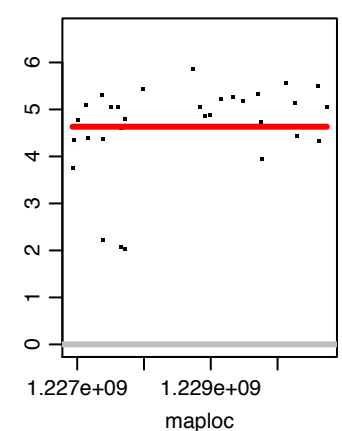

Chromosome HiC\_scaffold\_49

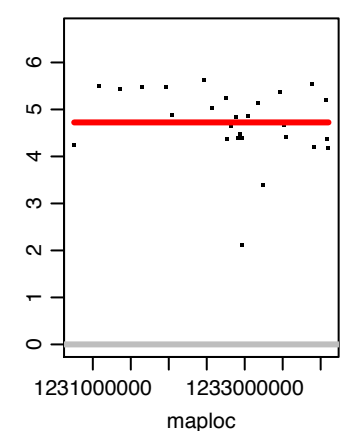

Chromosome HiC\_scaffold\_5

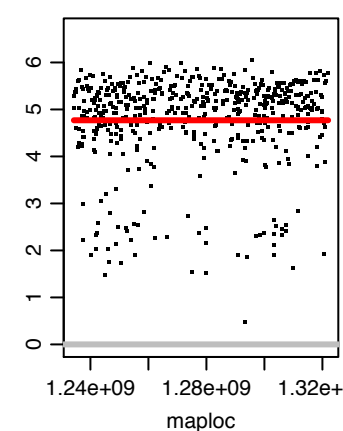

Chromosome HiC\_scaffold\_50

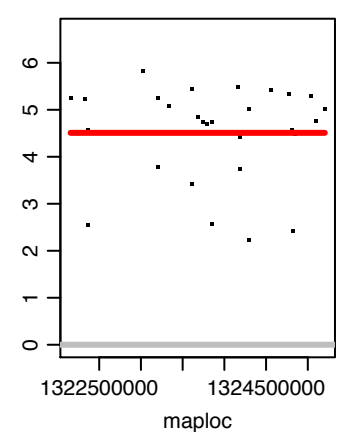

Chromosome HiC\_scaffold\_51

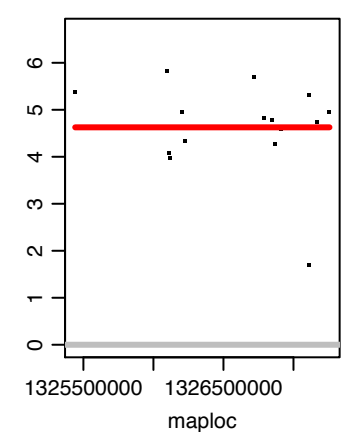

Chromosome HiC\_scaffold\_52

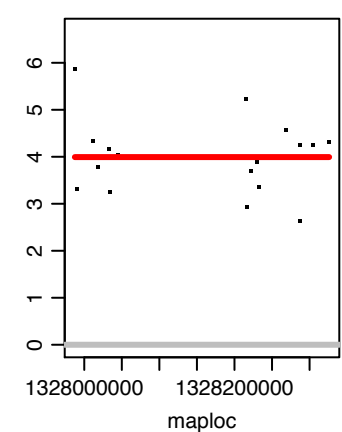

Chromosome HiC\_scaffold\_53

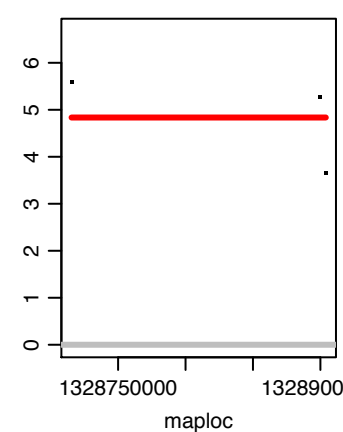

Chromosome HiC\_scaffold\_54

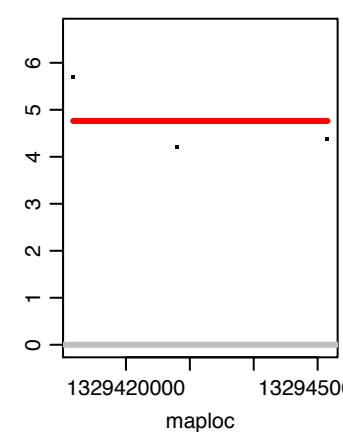

Chromosome HiC\_scaffold\_6

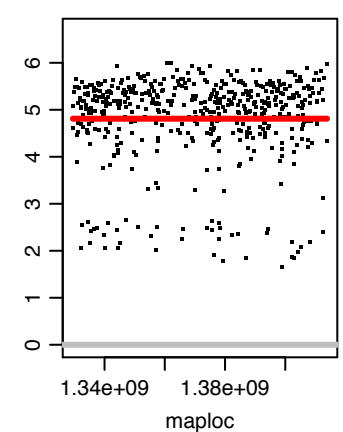

Chromosome HiC\_scaffold\_7

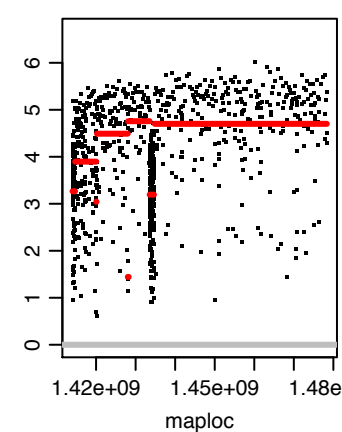

Chromosome HiC\_scaffold\_8

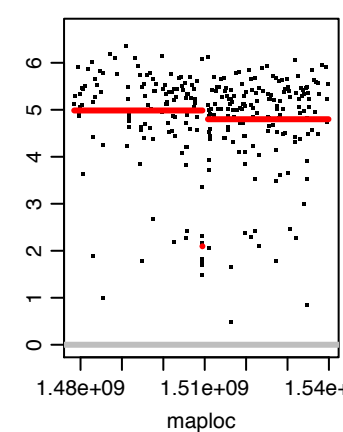

Chromosome HiC\_scaffold\_9

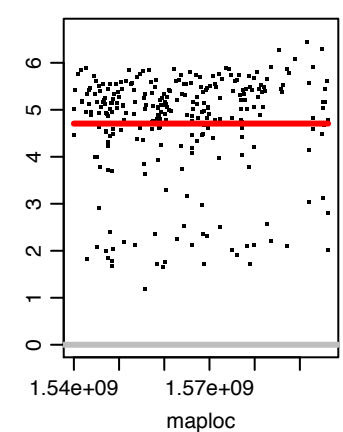

Supplement: 41559_2020_1166_MOESM1_ESM.pdf [file 41559_2020_1166_MOESM1_ESM.pdf]
